# Supplementary material for: Alkyl–aryl ketone synthesis via nickel-catalyzed reductive coupling of alkyl halides with aryl acids and anhydrides
Source: Royal Society of Chemistry journal article supplement (doi:10.1039/c5cc03113c), 2015-01-01

## Supporting Information

### **Alkyl-Aryl Ketone Synthesis via Nickel-Catalyzed Reductive Coupling of Alkyl Halides with Aryl Acids and Anhydrides**

Xiao Jia,<sup>a</sup> Xinghua Zhang,<sup>b\*</sup> Qun Qian,<sup>a\*</sup> Hegui Gong<sup>b\*</sup>

<sup>a</sup> Department of Chemistry, Shanghai University, 99 Shang-Da Road, Shanghai  
200444, China

<sup>b</sup> School of Chemical and Environmental Engineering, Shanghai Institute of Technology, 100 Hai-Quan  
Road, Shanghai 201418, China

hegui\_gong@shu.edu.cn

#### Table of Contents

|      |                                                        |         |
|------|--------------------------------------------------------|---------|
| I.   | <u>Experimental Section</u> .....                      | S2-S19  |
|      | Part 1. General Information.....                       | S2-S2   |
|      | Part 2. Details of Optimization of Glycosyl Bromides.. | S3-S5   |
|      | Part 3. Ketone Synthesis via Reductive coupling.....   | S6-S19  |
| II.  | <u>References</u> .....                                | S20     |
| III. | <u>Spectral Data for New Compounds</u> .....           | S21-S52 |

## Experimental Section

### Part 1. General Information

Experiments were conducted under a nitrogen atmosphere in oven-dried or flame-dried glassware with magnetic stirring, unless otherwise specified. For product purification by flash column chromatography, silica gel (300–400 mesh) and petroleum ether (bp 60–90 °C) were used. NMR spectra were measured on 500 MHz instruments at room temperature. Reference peaks for chloroform in <sup>1</sup>H NMR and <sup>13</sup>C NMR spectra were set at 7.26 ppm and 77.0 ppm, respectively. High-resolution mass spectra (HRMS) were obtained using a Ion Spec 4.7 TESLA FTMS. Low resolution mass spectra were recorded on GCMS-QP2010 SE (SHIMADZU). Melting point was recorded on a micro melting point apparatus (X-4, YUHUA Co., Ltd, Gongyi, China).

The following chemicals were purchased and used as received: Zn (99.9%, powder), NiI<sub>2</sub> (99.5%, Alfa Aesar), Ni(cod)<sub>2</sub> (99%, Stream), NiCl<sub>2</sub> (99.5%, Alfa Aesar), NiBr<sub>2</sub> (99.5%, Alfa Aesar), Ni(acac)<sub>2</sub> (99%, Alfa Aesar), Ni(ClO<sub>4</sub>)<sub>2</sub>·6H<sub>2</sub>O (99.5%, Alfa Aesar), 2,2'-bipyridine (**4a**, Aldrich), 4,4'-Di-*tert*-butyl-2,2'-bipyridine (**4b**, Aldrich), 4,4'-dimethyl-2,2'-bipyridine (**4c**, Aldrich), 4,4'-dimethoxy-2,2'-bipyridine (**4d**, Aldrich), 1,10-phenanthroline (**5a**, Aldrich), 4,7-diphenyl-1,10-phenanthroline (**5b**, Aldrich), DMA (99.8%, Super Dry, with molecular sieves), DMF (99.8%, Super Dry, with molecular sieves), Dioxane (99.5%, Super Dry, with molecular sieves), THF (99.5%, Super Dry, with molecular sieves), CH<sub>3</sub>CN (99.5%, Super Dry, with molecular sieves), MgCl<sub>2</sub> (99%, Alfa Aesar), TBAI (99%, Aladdin), Boc<sub>2</sub>O (99%, Aladdin), 2-iodopropane (TCI), iodocyclohexane (TCI), 2,3,4,6-Tetra-O-acetyl- $\alpha$ -D-glucopyranosyl bromide (98%, Aladdin), 2,3,4,6-Tetra-O-acetyl- $\alpha$ -D-galactopyranosyl bromide (93%, Aladdin), benzoic anhydride (Alfa Aesar). Ligands **3a**<sup>1</sup>, **3b**<sup>2</sup>, **3c**<sup>3</sup>, **5c**<sup>4</sup>, **6**<sup>5</sup>, **L-1**<sup>6</sup>, were synthesized according to the literature procedures. The anhydrides were prepared based on reported procedures<sup>7</sup>.

### Part 2. Details of Optimization of Glycosyl Bromides

**A typical procedure for optimization reactions of glycosyl bromide with benzoic anhydride:** To a flame-dried Schlenk tube equipped with a stir bar was loaded benzoic anhydride (51.0 mg, 0.225 mmol, 150%), followed by addition of zinc powder (29.4 mg, 0.45 mmol, 300%), glycosyl bromide (61.7 mg, 0.15 mmol, 100%), MgCl<sub>2</sub> (28.6mg, 0.3mmol, 200%), ligand (0.018 mmol, 12%) and Ni sources (0.015 mmol, 10%). The tube was evacuated and refilled nitrogen (N<sub>2</sub>) three time. Solvent (0.5 mL) was added via syringe. After the reaction mixture was allowed to stir for 12 hours under N<sub>2</sub> atmosphere at 25 °C, the suspension was partitioned between Na<sub>2</sub>CO<sub>3</sub> (saturated) and EtOAc. The organic phase was dried (over MgSO<sub>4</sub>) and filtered. The mixture was concentrated under reduced pressure, and the residue was loaded onto a silica column. Flash column chromatography provided the product as oil or solid.

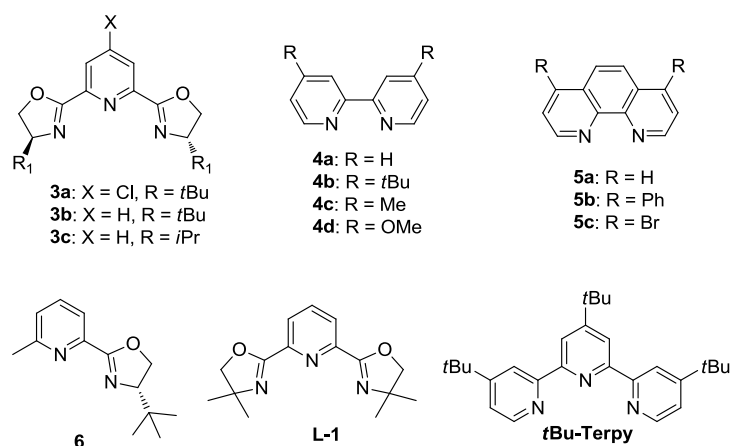

**Table S1:** Screening of catalysts

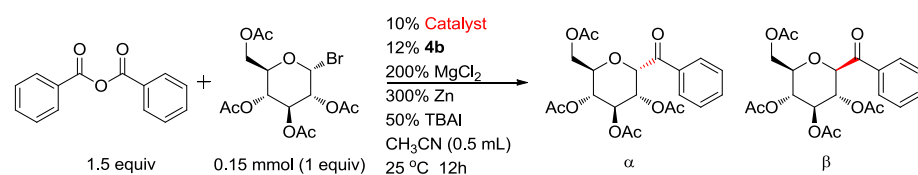

| Entry | Catalyst                                               | Yield (%) <sup>a</sup> | $\alpha/\beta$  |
|-------|--------------------------------------------------------|------------------------|-----------------|
| 1     | Ni(COD) <sub>2</sub>                                   | 20                     | 4.6/1           |
| 2     | NiI <sub>2</sub>                                       | trace                  | 2.85/1          |
| 3     | NiBr <sub>2</sub>                                      | 20                     | 3.3/1           |
| 4     | NiCl <sub>2</sub>                                      | trace                  | ND <sup>b</sup> |
| 5     | Ni(acac) <sub>2</sub>                                  | 25                     | 7/1             |
| 6     | Ni(ClO <sub>4</sub> ) <sub>2</sub> · 6H <sub>2</sub> O | 22                     | 5.5/1           |
| 7     | NiBr <sub>2</sub> ·dimethoxyethane                     | 21                     | 5/1             |
| 8     | none                                                   | ND <sup>b</sup>        |                 |

<sup>a</sup> Determined by NMR using trimethyl(phenyl)silane as the internal standard. <sup>b</sup> Not detected.

**Table S2:** Screening of ligands

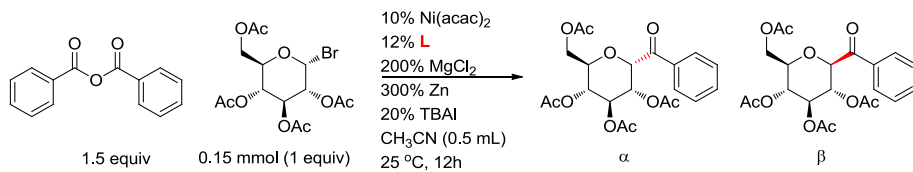

| Entry | Ligands           | Yield(%) <sup>a</sup> | $\alpha/\beta$ |
|-------|-------------------|-----------------------|----------------|
| 1     | 3b                | 14                    | 4.7/1          |
| 2     | 4a                | 37                    | 4.3/1          |
| 3     | 4b                | 25                    | 7/1            |
| 4     | 4c                | 29                    | 4.2/1          |
| 5     | 4d                | 28                    | 4/1            |
| 6     | 5a                | 62                    | 5.5/1          |
| 7     | 5b                | 31                    | 4/1            |
| 8     | L-1               | 21                    | 4.9/1          |
| 9     | <i>t</i> Bu-Terpy | trace <sup>b</sup>    |                |

<sup>a</sup> Determined by NMR using trimethyl(phenyl)silane as the internal standard. <sup>b</sup> Not detected.

**Table S3:** Screening of additives

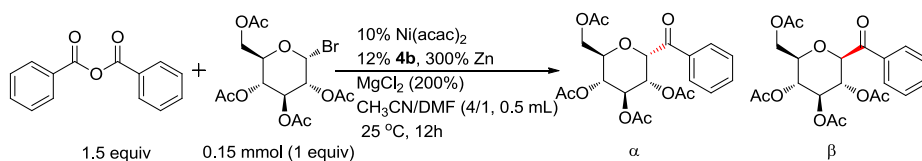

| Entry | TBAI | Yield(%) <sup>a</sup> | $\alpha/\beta$ |
|-------|------|-----------------------|----------------|
| 1     | none | none <sup>b</sup>     |                |
| 2     | 10   | 34                    | 3.9/1          |
| 3     | 20   | 67                    | 2.7/1          |
| 4     | 30   | 59                    | 3.5/1          |
| 5     | 40   | 55                    | 3.1/1          |
| 6     | 50   | 54                    | 2.5/1          |

<sup>a</sup> Determined by NMR using trimethyl(phenyl)silane as the internal standard. <sup>b</sup> Not detected.

**Table S4:** Solvent screening

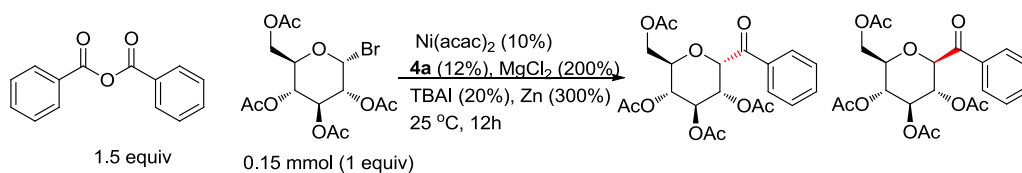

| Entry | Solvent (0.5 mL)             | Yield(%) <sup>a</sup> | $\alpha/\beta$ |
|-------|------------------------------|-----------------------|----------------|
| 1     | CH <sub>3</sub> CN           | 37                    | 4.3/1          |
| 2     | THF                          | 17                    | 1.6/1          |
| 3     | DMF                          | trace <sup>b</sup>    |                |
| 4     | DMSO                         | ND <sup>b</sup>       |                |
| 5     | CH <sub>3</sub> CN/DMF (4/1) | 68                    | 3.2/1          |
| 6     | CH <sub>3</sub> CN/THF (4/1) | 47                    | 2.5/1          |
| 7     | CH <sub>3</sub> CN/THF (4/1) | 51                    | 2.3/1          |
| 8     | CH <sub>3</sub> CN/THF (2/3) | 36                    | 2.8/1          |
| 9     | CH <sub>3</sub> CN/THF (4/1) | 37                    | 2.7/1          |

<sup>a</sup> Determined by NMR using trimethyl(phenyl)silane as the internal standard. <sup>b</sup> Not detected.

**Table S4:** Catalysts and Solvent screening

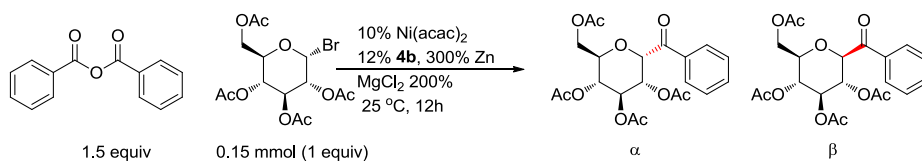

| Entry          | Catalysts                                            | Solvent (0.5 mL)                                | Yield(%) <sup>a</sup> | $\alpha/\beta$ |
|----------------|------------------------------------------------------|-------------------------------------------------|-----------------------|----------------|
| 1              | Ni(acac) <sub>2</sub>                                | CH <sub>3</sub> CN/DMF (4/1)                    | 68                    | 3.2/1          |
| 2              | Ni(COD) <sub>2</sub>                                 | CH <sub>3</sub> CN/DMF (4/1)                    | 35                    | 3.9/1          |
| 3              | Ni(ClO <sub>4</sub> ) <sub>2</sub> 6H <sub>2</sub> O | CH <sub>3</sub> CN/DMF (4/1)                    | 78                    | 3.1/1          |
| 4 <sup>b</sup> | Ni(ClO <sub>4</sub> ) <sub>2</sub> 6H <sub>2</sub> O | CH <sub>3</sub> CN/DMF (4/1)                    | 83 <sup>b</sup>       | 2.7/1          |
| 5              | Ni(ClO <sub>4</sub> ) <sub>2</sub> 6H <sub>2</sub> O | CH <sub>3</sub> CN/DMF (9/1, 1 mL) <sup>c</sup> | 90                    | 2.7/1          |

<sup>a</sup> Determined by NMR using trimethyl(phenyl)silane as the internal standard. <sup>b</sup> 20°C. <sup>c</sup>

### Part 3. Ketone Synthesis via Reductive Coupling.

**General procedure A for ketone synthesis via reductive coupling of alkyl bromides with aryl acids:** To a flame-dried Schlenk tube equipped with a stir bar was loaded aryl acids (0.225 mmol, 150%), followed by addition of zinc power (29.4 mg, 0.45 mmol, 300%), alkyl bromides (0.150 mmol, 100%), MgCl<sub>2</sub> (35.7 mg, 0.380 mmol, 250%), 4,4'-di-*tert*-butyl-2,2'-bipyridine (2.8 mg, 0.011 mmol, 7%) and Ni(acac)<sub>2</sub> (1.9 mg, 0.015 mmol, 5%). The tube was evacuated and refilled nitrogen (N<sub>2</sub>) three time. Boc<sub>2</sub>O (98.2 mg, 0.45 mmol) and CH<sub>3</sub>CN/DMF (1:4, 1 mL) was then added via syringe. After the reaction mixture was stirred for 12 hours under N<sub>2</sub> atmosphere at 25 °C, it was directly loaded onto a silica column without work-up. The residue in the reaction vessel was rinsed with small amount of DCM. Flash column chromatography provided the product as a solid or oil.

**General procedure B for ketone synthesis via reductive coupling of alkyl iodides with aryl acids:** To a flame-dried Schlenk tube equipped with a stir bar was loaded aryl acids (0.45 mmol), followed by addition of zinc power (58.8 mg, 0.9 mmol, 300%), MgCl<sub>2</sub> (57.2 mg, 0.6 mmol, 200%), 2,2'-bipyridine (5.6 mg, 0.036 mmol, 12%) and Ni(ClO<sub>4</sub>)<sub>2</sub>·6H<sub>2</sub>O (11 mg, 0.030 mmol, 10%). The tube was evacuated and refilled nitrogen (N<sub>2</sub>) three time. Boc<sub>2</sub>O (196.4mg, 0.9 mmol, 300%), alkyl iodides (0.3 mmol, 100%) and CH<sub>3</sub>CN/DMF (4:1, 1 mL) was added via syringe. After the reaction mixture was stirred for 12 hours under N<sub>2</sub> atmosphere at 25 °C, it was directly loaded onto a silica column without work-up. The residue in the reaction vessel was rinsed with small amount of DCM. Flash column chromatography provided the product as a solid or oil.

**General procedure C for ketone synthesis via reductive coupling of glycosyl bromides with aryl anhydrides:** To a flame-dried Schlenk tube equipped with a stir bar was loaded aryl anhydrides (0.45 mmol, 150%), followed by addition of zinc power (58.8 mg, 0.9 mmol, 300%), TBAI (22.2 mg, 0.06 mmol, 20%), glycosyl bromides (0.300 mmol, 100%), MgCl<sub>2</sub> (57.2 mg, 0.6 mmol), 2,2'-bipyridine (5.6 mg, 0.036 mmol, 12%) and Ni(ClO<sub>4</sub>)<sub>2</sub>·6H<sub>2</sub>O (11 mg, 0.03 mmol, 10%). The tube was evacuated and refilled nitrogen (N<sub>2</sub>) three time. CH<sub>3</sub>CN/DMF (9:1, 1 mL) was added via syringe. After the reaction mixture was stirred for 12 hours under N<sub>2</sub> atmosphere at 25 °C, the suspension was washed with Na<sub>2</sub>CO<sub>3</sub> (saturated) and extracted by EtOAc. The organic phase was dried (over MgSO<sub>4</sub>) and filtered. The mixture was concentrated under reduced pressure, and the residue was

loaded onto a silica column. Flash column chromatography provided the product as a solid or oil.

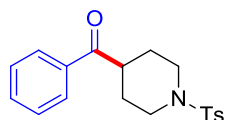

**Phenyl(1-tosylpiperidin-4-yl)methanone (2a).**

According to the general procedure A, the title compound was obtained in (45.3 mg, 0.132 mmol) 88% yield as a white solid. Purification of the crude material was performed by column chromatography (SiO<sub>2</sub>: 20% ethyl acetate in petroleum ether).<sup>8</sup>

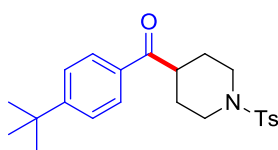

**(4-*tert*-Butylphenyl)(1-tosylpiperidin-4-yl)methanone (2b)**

According to the general procedure A, this compound was obtained in (50.3 mg, 0.126 mmol) 84% yield as a white solid. Purification of the crude material was performed by column chromatography (SiO<sub>2</sub>: 20% ethyl acetate in petroleum ether).<sup>8</sup>

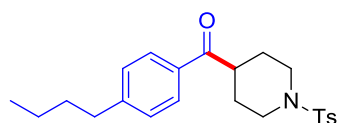

**(4-Butylphenyl)(1-tosylpiperidin-4-yl)methanone (2c).**

According to the general procedure A, this compound was obtained in (46.1 mg, 0.116 mmol) 77% yield as a white solid. Purification of the crude material was performed by column chromatography (SiO<sub>2</sub>: 20% ethyl acetate in petroleum ether). <sup>1</sup>H NMR (500 MHz, CDCl<sub>3</sub>): δ 7.76 (d, *J* = 8.2 Hz, 2H), 7.65 (d, *J* = 8.2 Hz, 2H), 7.33 (d, *J* = 7.9 Hz, 2H), 7.22 (d, *J* = 8.3 Hz, 2H), 3.76 (dt, *J* = 12.2, 4.3 Hz, 2H), 3.20–3.14 (m, 1H), 2.65–2.62 (t, *J* = 7.8 Hz, 2H), 2.51 (td, *J* = 11.4, 3.4 Hz, 2H), 2.44 (s, 3H), 1.94–1.83 (m, 4H), 1.61–1.55 (m, 2H), 1.33 (h, *J* = 7.4 Hz, 2H), 0.91 (t, *J* = 7.4 Hz, 3H). <sup>13</sup>C NMR (125 MHz, CDCl<sub>3</sub>): δ 201.0, 149.0, 143.5, 133.14, 133.08, 129.6, 128.7, 128.3, 127.7, 45.6, 42.1, 35.6, 33.1, 27.9, 22.2, 21.5, 13.8. HRMS (ESI): calcd for C<sub>23</sub>H<sub>29</sub>NO<sub>3</sub>S [M]<sup>+</sup> 399.1868, found 399.1868. m.p. 119–120 °C.

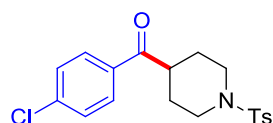

**(4-Chlorophenyl)(1-tosylpiperidin-4-yl)methanone (2d).**

According to the general procedure A, this compound was obtained in (39.6 mg, 0.105 mmol) 70% yield as a white solid. Purification of the crude material was performed by column chromatography (SiO<sub>2</sub>: 20% ethyl acetate in petroleum ether).<sup>8</sup>

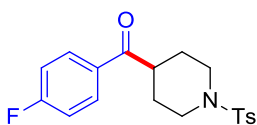

**(4-Fluorophenyl)(1-tosylpiperidin-4-yl)methanone (2e).**

According to the general procedure A, this compound was obtained in (41.7 mg, 0.116 mmol) 77% yield as a white solid. Purification of the crude material was performed by column chromatography (SiO<sub>2</sub>: 20% ethyl acetate in petroleum ether).<sup>8</sup>

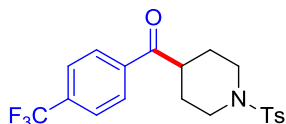

**(1-Tosylpiperidin-4-yl)(4-(trifluoromethyl)phenyl)methanone**

According to the general procedure A, this compound was obtained in (21.6 mg, 0.053 mmol) 35% yield as a white solid. Purification of the crude material was performed by column chromatography (SiO<sub>2</sub>: 20% ethyl acetate in petroleum ether). <sup>1</sup>H NMR (500 MHz, CDCl<sub>3</sub>): δ7.94 (d, *J* = 8.1 Hz, 2H), 7.69 (d, *J* = 8.3 Hz, 2H), 7.65 (d, *J* = 8.2 Hz, 2H), 7.34 (d, *J* = 8.2 Hz, 2H), 3.77 (dt, *J* = 12.0, 3.4 Hz, 2H), 3.20-3.14 (m, 1H), 2.52 (td, *J* = 11.6, 3.1 Hz, 2H), 2.45 (s, 3H), 1.98–1.81 (m, 4H). <sup>13</sup>C NMR (125 MHz, CDCl<sub>3</sub>): δ200.4, 143.7, 138.3, 134.8, 134.5, 134.3, 134.0, 133.0, 129.7, 128.5, 127.6, 126.7, 125.82, 125.80, 125.77, 125.74, 124.5, 122.3, 120.2, 45.4, 42.6, 27.6, 21.5. HRMS (ESI): calcd for C<sub>20</sub>H<sub>20</sub>F<sub>3</sub>NO<sub>3</sub>S [M]<sup>+</sup> 411.1116, found 411.1091.

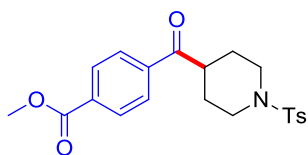

**Methyl 4-(1-tosylpiperidine-4-carbonyl)benzoate (2g)**

According to the general procedure A, this compound was obtained in (24.1 mg, 0.06 mmol) 40% yield as a white solid. Purification of the crude material was performed by column chromatography (SiO<sub>2</sub>: 20% ethyl acetate in petroleum ether). <sup>1</sup>H NMR (500 MHz, CDCl<sub>3</sub>): δ8.07 (d, *J* = 8.5 Hz, 2H) 7.87 (d, *J* = 8.4 Hz, 2H), 7.64 (d, *J* = 8.2 Hz, 2H), 7.33 (d, *J* = 8.0 Hz, 2H), 3.92 (s, 3H), 3.78–3.74 (m, 2H), 3.24-3.18 (m, 1H), 2.51 (td, *J* = 11.5, 3.1 Hz, 2H), 2.44 (s, 3H), 1.98-1.86 (m, 4H), 1.36 (s, 1H). <sup>13</sup>C NMR (125 MHz, CDCl<sub>3</sub>): δ201.0, 166.1, 143.7, 138.9, 134.0, 133.0, 130.0, 129.7, 128.0, 127.7, 52.5, 45.5, 42.7, 27.7, 21.6. HRMS (ESI): calcd for C<sub>21</sub>H<sub>23</sub>NO<sub>5</sub>S [M]<sup>+</sup> 401.1297, found 401.1263. m.p. 173-174 °C.

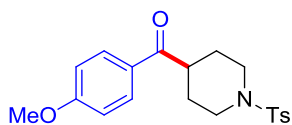

**(4-Methoxyphenyl)(1-tosylpiperidin-4-yl)methanone (2h).**

According to the general procedure A, this compound was obtained in (44.8 mg, 0.12 mmol) 80% yield as a white solid. Purification of the crude material was performed by column chromatography (SiO<sub>2</sub>: 20% ethyl acetate in petroleum ether).<sup>8</sup>



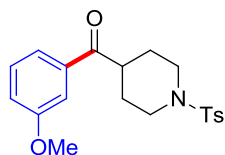

**(3-Methoxyphenyl)(1-tosylpiperidin-4-yl)methanone (2i).**

According to the general procedure A, this compound was obtained in (44.8 mg, 0.12 mmol) 80% yield as a white solid. Purification of the crude material was performed by column chromatography (SiO<sub>2</sub>: 20% ethyl acetate in petroleum ether).<sup>8</sup>

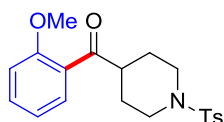

**(2-Methoxyphenyl)(1-tosylpiperidin-4-yl)methanone (2j).**

According to the general procedure A, this compound was obtained in 53% yield (29.7 mg, 0.080 mmol) as a white solid. Purification of the crude material was performed by column chromatography (SiO<sub>2</sub>: 20% ethyl acetate in petroleum ether).

<sup>1</sup>H NMR (500 MHz, CDCl<sub>3</sub>): δ7.65 (d, *J* = 8.0 Hz, 2H), 7.46 (dd, *J* = 7.7, 1.8 Hz, 1H), 7.44-7.41(m, 1H), 7.32 (d, *J* = 8.0 Hz, 2H), 6.98 (t, *J* = 7.6 Hz, 1H), 6.91 (d, *J* = 8.4 Hz, 1H), 3.82 (s, 3H), 3.67 (dt, *J* = 11.9, 4.1 Hz, 2H), 3.12-3.18(m, 1H), 2.49 (td, *J* = 11.4, 2.9 Hz, 2H), 2.44 (s, 3H), 1.93 (dd, *J* = 13.5, 3.9 Hz, 2H), 1.80-1.72 (m, 2H). <sup>13</sup>C NMR (125 MHz, CDCl<sub>3</sub>): δ204.4, 157.5, 143.4, 133.4, 133.1, 130.1, 129.6, 127.9, 127.7, 120.9, 111.3, 55.5, 46.7, 45.7, 27.3, 21.5. HRMS (ESI): calcd for C<sub>20</sub>H<sub>23</sub>NO<sub>4</sub>S [M]<sup>+</sup> 373.1348, found 373.1344. m.p. 111–112 °C.

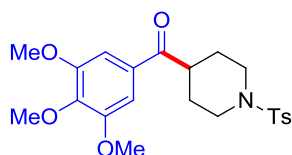

**(1-Tosylpiperidin-4-yl)(3,4,5-trimethoxyphenyl)methanone (2k).**

According to the general procedure A, this compound was obtained in 58% yield (37.7 mg, 0.087 mmol) as a white solid. Purification of the crude material was performed by column chromatography (SiO<sub>2</sub>: 30% ethyl acetate in petroleum ether).<sup>8</sup>

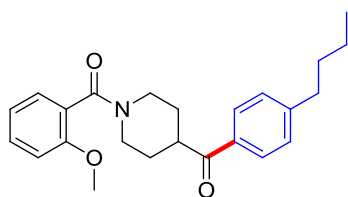

**(4-(4-butylbenzoyl)piperidin-1-yl)(2-methoxyphenyl)methanone (8)**

According to the general procedure A, this compound was obtained in (45.5 mg, 0.12 mmol) 80% yield as colorless oil. Purification of the crude material was performed by column chromatography (SiO<sub>2</sub>: 30% ethyl acetate in petroleum ether). <sup>1</sup>H NMR (500 MHz, CDCl<sub>3</sub>): δ7.85 (dd, *J* = 8.3, 3.3 Hz, 2H), 7.33–7.20

(m, 4H), 6.96 (m, 1H), 6.89 (d,  $J = 8.3$  Hz, 1H), 4.79–4.71 (m, 1H), 3.82 (d,  $J = 2.5$  Hz, 3H), 3.58 (dd,  $J = 13.9, 3.8$  Hz, 1H), 3.52–3.44 (m, 1H), 3.18–2.97 (m, 2H), 2.64 (t,  $J = 7.8$  Hz, 2H), 1.98 (m, 1H), 1.85–1.69 (m, 3H), 1.62–1.59 (m, 2H), 1.36–1.31 (m, 2H), 0.91 (t,  $J = 7.4$  Hz, 3H).  $^{13}\text{C}$  NMR (125 MHz,  $\text{CDCl}_3$ ):  $\delta$  201.4, 201.3, 167.7, 167.6, 155.24, 155.16, 148.88, 148.85, 133.2, 130.22, 130.17, 128.7, 128.3, 127.7, 127.6, 125.9, 125.8, 120.8, 120.7, 110.8, 110.7, 55.5, 55.4, 46.6, 46.0, 43.2, 43.1, 41.11, 41.10, 35.5, 33.1, 28.63, 28.57, 28.52, 28.46 22.2, 13.8. HRMS (ESI): calcd for  $\text{C}_{24}\text{H}_{29}\text{NO}_3$   $[\text{M}]^+$  379.2147, found 379.2147.

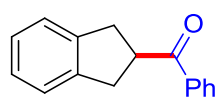

**(2,3-Dihydro-1H-inden-2-yl)(phenyl)methanone (9)**. According to the general procedure A, this compound was obtained in (27.7 mg, 0.125 mmol)

83% yield as a white solid. Purification of the crude material was performed by column chromatography ( $\text{SiO}_2$ : 10% ethyl acetate in petroleum ether).<sup>8</sup>

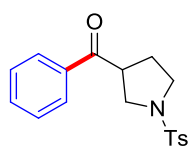

**Phenyl(1-tosylpyrrolidin-3-yl)methanone (10)**

According to the general procedure A, this compound was obtained in (34.5 mg, 0.105 mmol) 70% yield as a white solid. Purification of the crude material was

performed by column chromatography ( $\text{SiO}_2$ : 20% ethyl acetate in petroleum ether).  $^1\text{H}$  NMR (500 MHz,  $\text{CDCl}_3$ ):  $\delta$  7.88–7.84 (m, 2H), 7.75–7.70 (m, 2H), 7.60–7.56 (m, 1H), 7.50–7.45 (m, 2H), 7.33 (d,  $J = 8.2$  Hz, 2H), 3.93 (p,  $J = 7.7$  Hz, 1H), 3.71 (dd,  $J = 10.1, 8.0$  Hz, 1H), 3.47 (ddd,  $J = 9.8, 7.6, 6.4$  Hz, 1H), 3.38 (dd,  $J = 10.1, 7.3$  Hz, 1H), 3.25 (ddd,  $J = 9.9, 8.1, 6.0$  Hz, 1H), 2.45 (s, 3H), 2.22–2.05 (m, 2H).  $^{13}\text{C}$  NMR (125 MHz,  $\text{CDCl}_3$ ):  $\delta$  198.1, 143.6, 135.5, 133.6, 133.2, 129.7, 128.8, 128.3, 127.7, 50.0, 47.5, 45.0, 28.5, 21.5. HRMS (ESI): calcd for  $\text{C}_{18}\text{H}_{19}\text{NO}_3\text{S}$   $[\text{M}]^+$  329.1086, found 329.1079. m.p. 109–110 °C.

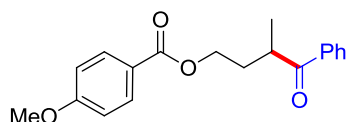

**3-Methyl-4-oxo-4-phenylbutyl 4-methoxybenzoate (11)**

According to the general procedure A, this compound was obtained in (29.5 mg, 0.0945 mmol) 63% yield as colorless oil.

Purification of the crude material was performed by column chromatography ( $\text{SiO}_2$ : 20% ethyl acetate in petroleum ether).<sup>8</sup>

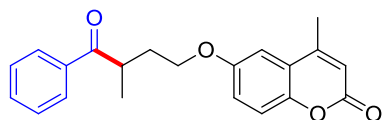

**4-Methyl-6-(3-methyl-4-oxo-4-phenylbutoxy)-2H-chromen-2-one (12)**

According to the general procedure A, this compound was obtained in (23.2 mg, 0.069 mmol) 46% yield as a white solid. Purification of the crude material was performed by column chromatography (SiO<sub>2</sub>: 20% ethyl acetate in petroleum ether). <sup>1</sup>H NMR (500 MHz, CDCl<sub>3</sub>): δ7.98–7.97 (m, 2H), 7.57–7.53 (m, 1H), 7.47–7.43 (m, 3H), 6.77 (dd, *J* = 6.3, 2.5 Hz, 2H), 6.73 (d, *J* = 2.4 Hz, 1H), 6.10 (q, *J* = 1.2 Hz, 1H), 4.09 (ddd, *J* = 9.5, 6.8, 5.4 Hz, 1H), 4.02 (ddd, *J* = 9.5, 6.9, 5.3 Hz, 1H), 3.83–3.76 (m, 1H), 2.42–2.38 (m, 1H), 2.36 (d, *J* = 1.3 Hz, 1H), 1.96 (ddt, *J* = 14.3, 6.9, 5.6 Hz, 1H), 1.28 (d, *J* = 7.0 Hz, 3H). <sup>13</sup>C NMR (125 MHz, CDCl<sub>3</sub>): δ203.4, 161.7, 161.2, 155.1, 152.4, 136.2, 133.0, 128.6, 128.2, 125.4, 113.5, 112.1, 111.9, 101.5, 66.2, 37.1, 32.5, 18.6, 17.8. HRMS (ESD): calcd for C<sub>21</sub>H<sub>20</sub>O<sub>4</sub> [M]<sup>+</sup> 336.1362, found 336.1335. m.p. 127–128 °C.

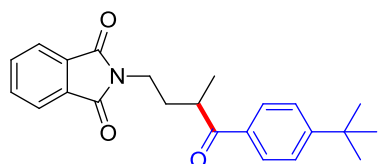

**2-(4-(4-(*tert*-Butyl)phenyl)-3-methyl-4-oxobutyl)isoindoline-1,3-dione (13)**

According to the general procedure A, this compound was obtained in (21.8 mg, 0.06 mmol) 40% yield as a colorless oil. Purification of the crude material was performed by column chromatography (SiO<sub>2</sub>: 20% ethyl acetate in petroleum ether).<sup>8</sup>

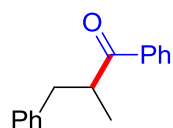

**2-Methyl-1,3-diphenylpropan-1-one(1a)henyl(1-tosylpyrrolidin-3-yl)methanone (14)**

According to the general procedure A, this compound was obtained in (24.9 mg, 0.111 mmol) 74% yield as a colorless oil. Purification of the crude material was performed by column chromatography (SiO<sub>2</sub>: 5% ethyl acetate in petroleum ether).<sup>8</sup>

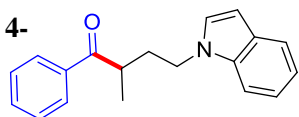

**(1H-Indol-1-yl)-2-methyl-1-phenylbutan-1-one (15)**

According to the general procedure A, this compound was obtained in (45.7 mg, 0.165 mmol) 55% yield as a colorless oil. Purification of the crude material was performed by column chromatography (SiO<sub>2</sub>: 10% ethyl acetate in petroleum ether). <sup>1</sup>H NMR (500 MHz, CDCl<sub>3</sub>): δ7.81–7.76 (m, 2H), 7.67 (d, *J* = 7.65 Hz, 1H), 7.56–7.53 (m, 1H), 7.42–7.39 (t, *J* = 7.74, 2H), 7.32 (d, *J* = 8.2 Hz, 1H), 7.18 (dt, *J* = 8.1, 7.0, 1.2 Hz, 1H), 7.12 (dt, *J* = 7.9, 7.0, 1.0 Hz, 1H),

7.03 (d,  $J = 3.1$  Hz, 1H), 6.51 (d,  $J = 3.1$  Hz, 1H), 4.26–4.13 (m, 2H), 3.36–3.29 (m, 1H), 2.50–2.43 (m, 1H), 2.00–1.92 (m, 1H), 1.24 (d,  $J = 7.1$  Hz, 3H).  $^{13}\text{C}$  NMR (125 MHz,  $\text{CDCl}_3$ ):  $\delta$ 203.1, 135.84, 135.80, 133.0, 128.60, 128.57, 128.2, 127.8, 121.5, 120.9, 119.3, 109.4, 101.2, 44.1, 37.6, 33.4, 17.8. HRMS (ESI): calcd for  $\text{C}_{19}\text{H}_{19}\text{NO}$   $[\text{M}]^+$  277.1467, found 277.1455.

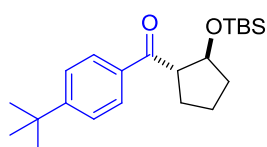

**(2-(*tert*-Butyldimethylsilyloxy)cyclopentyl)(4-*tert*-butylphenyl)methanone (16).**

According to the general procedure A, this compound was obtained in (52.4 mg, 0.146 mmol) 97% yield as a colorless oil. Purification of the crude material was performed by column chromatography ( $\text{SiO}_2$ : 3% ethyl acetate in petroleum ether).<sup>8</sup>

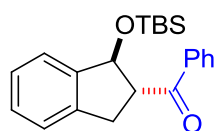

**(1-((*tert*-Butyldimethylsilyloxy)-2,3-dihydro-1H-inden-2-yl)(phenyl)methanone (17).**

According to the general procedure A, this compound was obtained in (45.5 mg, 0.129 mmol) 86% yield as a white solid. Purification of the crude material was performed by column chromatography ( $\text{SiO}_2$ : 5% ethyl acetate in petroleum ether).<sup>8</sup>

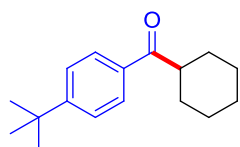

**(4-*tert*-Butylphenyl)(cyclohexyl)methanone (18).**

According to the general procedure B, this compound was obtained in (32.3 mg, 0.132 mmol) 88% yield as a colorless oil. Purification of the crude material was performed by column chromatography ( $\text{SiO}_2$ : 3% ethyl acetate in petroleum ether).<sup>8</sup>

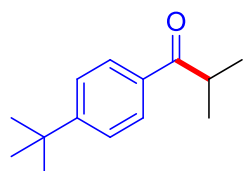

**1-(4-*tert*-Butylphenyl)-2-methylpropan-1-one (19).**

According to the general procedure B, this compound was obtained in (16.9 mg, 0.0825 mmol) 55% yield as a colorless oil. Purification of the crude material was performed by column chromatography ( $\text{SiO}_2$ : 3% ethyl acetate in petroleum ether).<sup>9</sup>

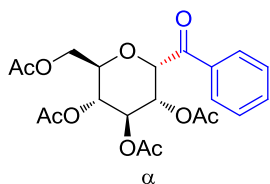

**(2*R*,3*R*,4*S*,5*R*,6*S*)-2-(Acetoxymethyl)-6-benzoyltetrahydro-2H-pyran-3,4,5-triyl triacetate ( $\alpha$ -21).**

According to the general procedure C, this compound was obtained in (117.7 mg, 0.27 mmol) 90% yield and ratio of  $\alpha$  to  $\beta$  (3.4:1) as a colorless oil. Purification of the crude material was performed by column chromatography (SiO<sub>2</sub>: 30% ethyl acetate in petroleum ether). <sup>1</sup>H NMR (500 MHz, CDCl<sub>3</sub>):  $\delta$ 7.94–7.92 (m, 2H), 7.59 (t,  $J$  = 7.4 Hz, 1H), 7.46 (t,  $J$  = 7.8 Hz, 2H), 5.87 (t,  $J$  = 9.4 Hz, 1H), 5.59 (d,  $J$  = 6.4 Hz, 1H), 5.25 (dd,  $J$  = 9.8, 6.3 Hz, 1H), 5.06 (t,  $J$  = 9.2 Hz, 1H), 4.21–4.17 (m, 2H), 3.99 (dd,  $J$  = 13.9, 3.9 Hz, 1H), 2.01 (s, 3H), 2.00 (s, 3H), 1.96 (s, 3H), 1.78 (s, 3H). <sup>13</sup>C NMR (125 MHz, CDCl<sub>3</sub>):  $\delta$ 195.9, 170.4, 170.1, 169.8, 169.6, 135.7, 134.0, 128.7, 128.6, 71.9, 71.2, 70.2, 69.3, 68.4, 61.9, 20.6, 20.5, 20.3. **HRMS (ESI):** calcd for C<sub>21</sub>H<sub>24</sub>O<sub>10</sub> [M]<sup>+</sup> 436.1369, found 436.1369.

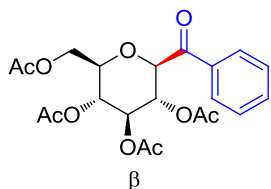

**(2*R*,3*R*,4*S*,5*R*,6*R*)-2-(Acetoxymethyl)-6-benzoyltetrahydro-2H-pyran-3,4,5-triyl triacetate ( $\beta$ -21).**

<sup>1</sup>H NMR (500 MHz, CDCl<sub>3</sub>):  $\delta$ 7.99–7.97 (m, 2H), 7.61 (t,  $J$  = 7.3 Hz, 1H), 7.48 (t,  $J$  = 7.8 Hz, 2H), 5.50 (t,  $J$  = 9.6 Hz, 1H), 5.36 (t,  $J$  = 9.4 Hz, 1H), 5.16 (t,  $J$  = 9.7 Hz, 1H), 4.75 (d,  $J$  = 9.8 Hz, 1H), 4.24 (dd,  $J$  = 12.4, 5.6 Hz, 1H), 4.15 (dd,  $J$  = 12.5, 2.4 Hz, 1H), 3.91 (ddd,  $J$  = 10.0, 5.6, 2.3 Hz, 1H), 2.07 (s, 3H), 2.06 (s, 3H), 2.02 (s, 3H), 1.84 (s, 3H). <sup>13</sup>C NMR (125 MHz, CDCl<sub>3</sub>):  $\delta$ 191.9, 170.52, 170.47, 169.4, 168.9, 134.9, 134.0, 129.3, 128.6, 77.7, 76.7, 74.2, 68.9, 68.2, 62.3, 20.69, 20.64, 20.58, 20.4. **HRMS (ESI):** calcd for C<sub>21</sub>H<sub>24</sub>O<sub>10</sub> [M]<sup>+</sup> 436.1369, found 436.1368. m.p. 127–128°C.

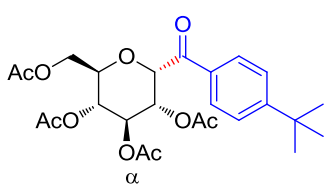

**(2*R*,3*R*,4*S*,5*R*,6*S*)-2-(Acetoxymethyl)-6-(4-(tert-butyl)benzoyl)tetrahydro-2H-pyran-3,4,5-triyl triacetate ( $\alpha$ -22).**

According to the general procedure C, this compound was obtained in (122.6 mg, 0.249 mmol) 83% yield and ratio of  $\alpha$  to  $\beta$  (2.8:1) as a white solid. Purification of the crude material was performed by column chromatography (SiO<sub>2</sub>: 30% ethyl acetate in petroleum ether). <sup>1</sup>H NMR (500 MHz, CDCl<sub>3</sub>):  $\delta$ 7.90 (d,  $J$  = 8.4 Hz, 2H), 7.49 (d,  $J$  = 8.5 Hz, 2H), 5.93 (t,  $J$  = 9.4 Hz, 1H), 5.60 (d,  $J$  = 6.3 Hz, 1H), 5.29–5.24 (m, 1H), 5.09 (t,  $J$  = 9.3 Hz, 1H), 4.22–4.18 (m, 2H), 4.00 (dd,  $J$  = 13.8, 3.4 Hz, 1H), 2.03 (s, 3H), 2.02 (s, 3H), 1.98 (s, 3H), 1.80 (s, 3H), 1.33 (s, 9H). <sup>13</sup>C NMR (125 MHz, CDCl<sub>3</sub>):  $\delta$ 195.3, 170.5, 170.2, 169.9, 169.7, 158.0, 133.2, 128.7, 125.8, 71.9, 71.2, 70.4, 69.4, 68.5, 61.9, 35.2, 31.04, 30.95, 20.69, 20.61, 20.60, 20.4. **HRMS (ESI):** calcd for C<sub>25</sub>H<sub>32</sub>O<sub>10</sub> [M]<sup>+</sup> 492.1995, found 492.1994. m.p. 139–140 °C.

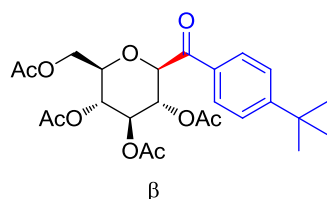

**(2*R*,3*R*,4*S*,5*R*,6*R*)-2-(Acetoxymethyl)-6-(4-(tert-butyl)benzoyl)tetrahydro-2H-pyran-3,4,5-triyl triacetate ( $\beta$ -22).**

$^1\text{H NMR}$  (500 MHz,  $\text{CDCl}_3$ ):  $\delta$ 7.91 (d,  $J$  8.5, 2H), 7.48 (d,  $J$  = 8.4 Hz, 2 H), 5.49 (t,  $J$  = 9.6 Hz, 1H), 5.35 (t,  $J$  = 9.4 Hz, 1H), 5.15 (t,  $J$  = 9.7 Hz, 1H), 4.73 (d,  $J$  = 9.9 Hz, 1H), 4.24 (dd,  $J$  = 12.3, 5.4 Hz, 1H), 4.14 (dd,  $J$  = 12.4, 2.4 Hz, 1H), 3.90 (ddd,  $J$  = 10.1, 5.5, 2.4 Hz, 2H), 2.06 (s, 3H), 2.05 (s, 3H), 2.01 (s, 3H), 1.82 (s, 3H), 1.33 (s, 9H).  $^{13}\text{C NMR}$  (125 MHz,  $\text{CDCl}_3$ ):  $\delta$ 191.3, 170.52, 170.47, 169.3, 168.9, 157.9, 132.3, 129.2, 125.5, 77.6, 76.6, 74.2, 68.9, 68.2, 62.2, 35.2, 31.0, 29.6, 20.66, 20.62, 20.56, 20.4. HRMS (ESI): calcd for  $\text{C}_{25}\text{H}_{32}\text{O}_{10}$   $[\text{M}]^+$  492.1995, found 492.1993. m.p. 128-129 °C.

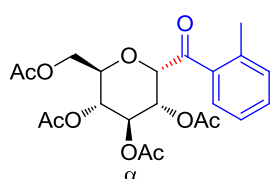

**(2*R*,3*R*,4*S*,5*R*,6*S*)-2-(Acetoxymethyl)-6-(2-methylbenzoyl)tetrahydro-2H-pyran-3,4,5-triyl triacetate ( $\alpha$ -23).**

According to the general procedure C, this compound was obtained in (102.6 mg, 0.228 mmol) 76% yield and ratio of  $\alpha$  to  $\beta$  (1.8:1) as a white solid. Purification of the crude material was performed by column chromatography ( $\text{SiO}_2$ : 30% ethyl acetate in petroleum ether).  $^1\text{H NMR}$  (500 MHz,  $\text{CDCl}_3$ ):  $\delta$ 7.55 (d,  $J$  = 7.7 Hz, 1H), 7.39 (t,  $J$  = 7.5 Hz, 1H), 7.27 (t,  $J$  = 8.1 Hz, 2H), 5.75 (t,  $J$  = 9.3 Hz, 1H), 5.51 (d,  $J$  = 6.7 Hz, 1H), 5.19 (dd,  $J$  = 9.8, 6.7 Hz, 1H), 5.09 (t,  $J$  = 9.4 Hz, 1H), 4.61 (ddd,  $J$  = 10.0, 4.8, 2.2 Hz, 1H), 4.25 (dd,  $J$  = 12.5, 4.8 Hz, 1H), 4.10 (dd,  $J$  = 12.5, 2.3 Hz, 1H), 2.51 (s, 3H), 2.05 (s, 6H), 2.02 (s, 3H), 1.63 (s, 3H).  $^{13}\text{C NMR}$  (125 MHz,  $\text{CDCl}_3$ ):  $\delta$ 201.1, 170.6, 169.82, 169.79, 169.6, 138.5, 137.2, 132.0, 128.5, 125.8, 72.8, 71.9, 70.1, 69.6, 68.3, 62.0, 20.8, 20.68, 20.67, 20.62, 20.0. HRMS (ESI): calcd for  $\text{C}_{22}\text{H}_{26}\text{O}_{10}$   $[\text{M}]^+$  450.1526, found 450.1526. m.p. 122–123 °C.

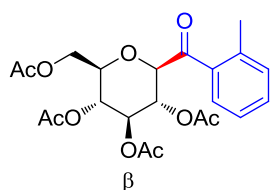

**(2*R*,3*R*,4*S*,5*R*,6*S*)-2-(Acetoxymethyl)-6-(2-methylbenzoyl)tetrahydro-2H-pyran-3,4,5-triyl triacetate ( $\beta$ -23).**

$^1\text{H NMR}$  (500 MHz,  $\text{CDCl}_3$ ):  $\delta$ 7.70 (d,  $J$  = 7.7 Hz, 1H), 7.40 (t,  $J$  = 7.3 Hz, 1H), 7.27 (t,  $J$  = 9.4 Hz, 2H), 5.40 (t,  $J$  = 9.6 Hz, 1H), 5.31 (t,  $J$  = 9.4 Hz, 1H), 5.12 (t,  $J$  = 9.7 Hz, 1H), 4.70 (d,  $J$  = 9.8 Hz, 1H), 4.21 (dd,  $J$  = 12.3, 6.1 Hz, 1H), 4.12 (dd,  $J$  = 12.4, 2.4 Hz, 1H), 3.84 (ddd,  $J$  = 10.1, 5.5, 2.4 Hz, 2H), 2.45 (s, 3H), 2.03 (s, 6H), 2.00 (s, 3H), 1.75 (s, 3H).  $^{13}\text{C NMR}$  (125 MHz,  $\text{CDCl}_3$ ):  $\delta$ 194.9, 170.5, 170.4, 169.3, 168.9, 140.0, 135.2, 132.2, 132.1, 129.4, 125.4, 78.3, 76.4, 74.2, 69.1, 68.2, 62.2, 21.3, 20.63, 20.58, 20.53, 20.2. HRMS (ESI): calcd for  $\text{C}_{22}\text{H}_{26}\text{O}_{10}$   $[\text{M}]^+$  450.1526, found 450.1526.

m.p. 109-110 °C

**(2*R*,3*R*,4*S*,5*R*,6*S*)-2-(Acetoxymethyl)-6-(4-methylbenzoyl)tetrahydro-2H-pyran-3,4,5-triyl**

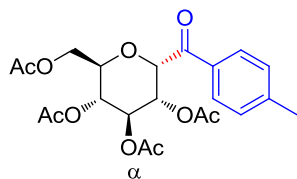

**triacetate ( $\alpha$ -24).**

According to the general procedure C, this compound was obtained in (112.1 mg, 0.249 mmol) 83% yield and ratio of  $\alpha$  to  $\beta$  (3.2:1) as a colorless oil. Purification of the crude material was performed by column chromatography (SiO<sub>2</sub>: 30% ethyl acetate in petroleum ether). <sup>1</sup>H NMR (500 MHz, CDCl<sub>3</sub>):  $\delta$ 7.83 (d,  $J$  = 8.3 Hz, 2H), 7.25 (d,  $J$  = 8.2 Hz, 2H), 5.89 (t,  $J$  = 9.3 Hz, 1H), 5.57 (d,  $J$  = 6.3 Hz, 1H), 5.24 (dd,  $J$  = 9.8, 6.4 Hz, 1H), 5.06 (t,  $J$  = 9.3 Hz, 1H), 4.21–4.15 (m, 2H), 4.00–3.96 (m, 1H), 2.39 (s, 3H), 2.00 (s, 3H) 1.99 (s, 3H), 1.97 (s, 3H), 1.79 (s, 3H). <sup>13</sup>C NMR (125 MHz, CDCl<sub>3</sub>):  $\delta$ 195.3, 170.4, 170.1, 169.8, 169.6, 145.1, 133.2, 129.4, 128.8, 71.8, 71.0, 70.3, 69.3, 68.5, 61.8, 21.6, 20.6, 20.5, 20.4. HRMS (ESI): calcd for C<sub>22</sub>H<sub>26</sub>O<sub>10</sub> [M]<sup>+</sup> 450.1526, found 450.1522.

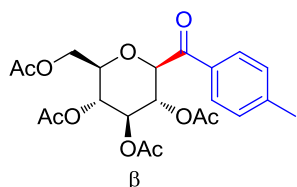

**(2*R*,3*R*,4*S*,5*R*,6*R*)-2-(Acetoxymethyl)-6-(4-methylbenzoyl)tetrahydro-2H-pyran-3,4,5-triyl triacetate ( $\beta$ -24).**

<sup>1</sup>H NMR (500 MHz, CDCl<sub>3</sub>):  $\delta$ 7.87 (d,  $J$  = 8.3 Hz, 2H), 7.26 (d,  $J$  = 8.0 Hz, 2H), 5.48 (t,  $J$  = 9.6 Hz, 1H), 5.34 (t,  $J$  = 9.4 Hz, 1H), 5.15 (t,  $J$  = 9.7 Hz, 1H), 4.71 (d,  $J$  = 9.8 Hz, 1H), 4.23 (dd,  $J$  = 12.5, 5.7 Hz, 1H), 4.14 (dd,  $J$  = 12.3, 2.2 Hz, 1H), 3.89 (ddd,  $J$  = 10.1, 5.5, 2.4 Hz, 2H), 2.41 (s, 3H), 2.06 (s, 3H), 2.05 (s, 3H), 2.01 (s, 3H), 1.83 (s, 3H). <sup>13</sup>C NMR (125 MHz, CDCl<sub>3</sub>):  $\delta$ 191.4, 170.52, 170.45, 169.3, 168.9, 145.0, 132.4, 129.4, 129.3, 77.7, 76.6, 74.2, 68.9, 68.2, 62.2, 21.7, 20.68, 20.62, 20.56, 20.4. HRMS (ESI): calcd for C<sub>22</sub>H<sub>26</sub>O<sub>10</sub> [M]<sup>+</sup> 450.1526, found 450.1523. m.p. 108–109 °C.

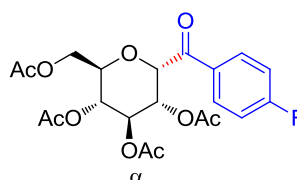

**(2*R*,3*R*,4*S*,5*R*,6*S*)-2-(Acetoxymethyl)-6-(4-fluorobenzoyl)tetrahydro-2H-pyran-3,4,5-triyl triacetate ( $\alpha$ -25).**

According to the general procedure C, this compound was obtained in (113.1 mg, 0.249 mmol) 83% yield and ratio of  $\alpha$  to  $\beta$  (3.4:1) as a white solid. Purification of the crude material was performed by column chromatography. (SiO<sub>2</sub>: 30% ethyl acetate in petroleum ether). <sup>1</sup>H NMR (500 MHz, CDCl<sub>3</sub>):  $\delta$ 8.01–7.98 (m, 2H), 7.13 (t,  $J$  = 8.6 Hz, 2H), 5.88 (t,  $J$  = 9.2 Hz, 1H), 5.54 (d,  $J$  = 6.3 Hz, 1H), 5.23 (dd,  $J$  = 9.6, 6.2 Hz, 1H), 5.06 (t,  $J$  = 9.4 Hz, 1H), 4.18 (dd,  $J$  = 12.4, 4.9 Hz, 1H), 4.10 (ddd,  $J$  = 9.9, 4.9, 2.2 Hz, 1H), 3.98 (dd,  $J$  = 12.4, 2.3 Hz, 1H), 2.03 (s, 6H), 1.97 (s, 3H), 1.83 (s, 3H). <sup>13</sup>C NMR (125 MHz, CDCl<sub>3</sub>):  $\delta$ 194.0, 170.4, 170.1, 169.8, 169.6, 167.2, 165.1, 131.99, 131.97, 131.63, 131.55, 116.0, 115.9, 72.0, 71.3, 70.1, 69.3, 68.4, 61.8, 20.61, 20.58, 20.52, 20.4. HRMS (ESI): calcd for C<sub>21</sub>H<sub>23</sub>FO<sub>10</sub> [M]<sup>+</sup> 454.1275, found 454.1274. m.p. 88–89°C.

**(2*R*,3*R*,4*S*,5*R*,6*R*)-2-(Acetoxymethyl)-6-(4-fluorobenzoyl)tetrahydro-2H-pyran-3,4,5-triyl**

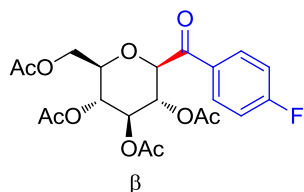

**triacetate ( $\beta$ -25).**

$^1\text{H NMR}$  (500 MHz,  $\text{CDCl}_3$ ):  $\delta$ 8.04–8.01 (m, 2H), 7.14 (t,  $J = 8.6$  Hz, 2H), 5.47 (t,  $J = 9.6$  Hz, 1H), 5.34 (t,  $J = 9.4$  Hz, 1H), 5.15 (t,  $J = 9.7$  Hz, 1H), 4.67 (d,  $J = 9.9$  Hz, 1H), 4.23 (dd,  $J = 12.5, 5.4$  Hz, 1H), 4.15 (dd,  $J = 12.4, 2.3$  Hz, 1H), 3.90 (ddd,  $J = 10.1, 5.6, 2.4$  Hz, 2H), 2.07 (s, 3H), 2.05 (s, 3H), 2.02 (s, 3H), 1.87 (s, 3H).  $^{13}\text{C NMR}$  (125 MHz,  $\text{CDCl}_3$ ):  $\delta$ 190.4, 170.44, 170.40, 169.3, 168.9, 167.2, 165.1, 132.13, 132.06, 131.20, 131.17, 115.9, 115.7, 78.1, 76.7, 74.0, 68.8, 68.1, 62.2, 20.66, 20.60, 20.5, 20.4. **HRMS (ESI)**: calcd for  $\text{C}_{21}\text{H}_{23}\text{FO}_{10}$   $[\text{M}]^+$  454.1275, found 454.1274. m.p. 128-129 °C.

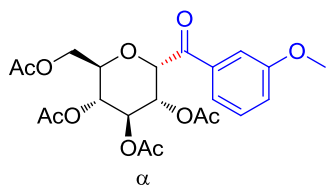

**(2R,3R,4S,5R,6S)-2-(acetoxymethyl)-6-(3-methoxybenzoyl)tetrahydro-2H-pyran-3,4,5-triyl triacetate ( $\alpha$ -26).**

According to the general procedure C, this compound was obtained in (111.9 mg, 0.24 mmol) 80% yield and ratio of  $\alpha$  to  $\beta$  (3.7:1). as a colorless oil. Purification of the crude material was performed by column chromatography ( $\text{SiO}_2$ : 30% ethyl acetate in petroleum ether).  $^1\text{H NMR}$  (500 MHz,  $\text{CDCl}_3$ ):  $\delta$ 7.51 (d,  $J = 7.8$  Hz, 1H), 7.47 (s, 1H), 7.37 (t,  $J = 7.9$  Hz, 1H), 7.14 (dd,  $J = 8.2, 2.2$  Hz, 1H) 5.89 (t,  $J = 9.4$  Hz, 1H), 5.59 (d,  $J = 6.4$  Hz, 1H), 5.29–5.24 (m, 1H), 5.07 (t,  $J = 9.4$  Hz, 1H), 4.24–4.19 (m, 2H), 4.02 (dd,  $J = 14.1, 4.0$  Hz, 1H), 3.84 (s, 3H), 2.02 (s, 3H), 2.01 (s, 3H), 1.99 (s, 3H), 1.80 (s, 3H).  $^{13}\text{C NMR}$  (125 MHz,  $\text{CDCl}_3$ ):  $\delta$ 195.8, 170.5, 170.1, 169.8, 169.6, 159.9, 137.0, 129.8, 121.3, 120.8, 112.5, 72.0, 71.3, 70.3, 69.3, 68.5, 61.9, 55.4, 20.7, 20.6, 20.4. **HRMS (ESI)**: calcd for  $\text{C}_{22}\text{H}_{26}\text{O}_{11}$   $[\text{M}]^+$  466.1475, found 466.1474.

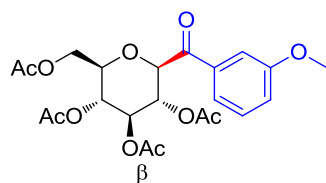

**(2R,3R,4S,5R,6R)-2-(Acetoxymethyl)-6-(3-methoxybenzoyl)tetrahydro-2H-pyran-3,4,5-triyl triacetate ( $\beta$ -26).**

$^1\text{H NMR}$  (500 MHz,  $\text{CDCl}_3$ ):  $\delta$ 7.56 (d,  $J = 7.6$  Hz, 1H), 7.5 (s, 1H), 7.38 (t,  $J = 7.8$  Hz, 1H), 7.14 (dd,  $J = 8.4, 2.6$  Hz, 1H), 5.49 (t,  $J = 9.6$  Hz, 1H), 5.35 (t,  $J = 9.4$  Hz, 1H), 5.15 (t,  $J = 9.4$  Hz, 1H), 4.72 (d,  $J = 9.8$  Hz, 1H), 4.22 (dd,  $J = 12.4, 5.6$  Hz, 1H), 4.14 (dd,  $J = 12.3, 2.4$  Hz, 1H), 3.91 (ddd,  $J = 10.0, 5.6, 2.3$  Hz, 1H), 3.84 (s, 3H), 2.06 (s, 3H), 2.05 (s, 3H), 2.02 (s, 3H), 1.86 (s, 3H).  $^{13}\text{C NMR}$  (125 MHz,  $\text{CDCl}_3$ ):  $\delta$ 191.6, 170.6, 170.5, 169.4, 168.9, 159.8, 136.1, 129.5, 121.8, 120.3, 113.7, 77.7, 76.7, 74.2, 68.9, 68.2, 62.2, 55.4, 20.63, 20.57, 20.4. **HRMS (ESI)**: calcd for  $\text{C}_{22}\text{H}_{26}\text{O}_{11}$   $[\text{M}]^+$  466.1475, found 466.1474.

m.p. 103-104 °C.

**(2R,3S,4S,5R,6S)-2-(Acetoxymethyl)-6-benzoyltetrahydro-2H-pyran-3,4,5-triyl triacetate ( $\alpha$ -**



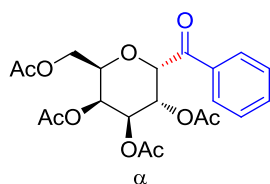

**27).**

According to the general procedure C, this compound was obtained in (109.9 mg, 0.252 mmol) 84% yield and ratio of  $\alpha$  to  $\beta$  (4.5:1) as a white solid. Purification of the crude material was performed by column chromatography (SiO<sub>2</sub>: 30% ethyl acetate in petroleum ether). <sup>1</sup>H NMR (500 MHz, CDCl<sub>3</sub>):  $\delta$  7.91 (dd,  $J$  = 8.6, 1.2 Hz, 2H), 7.59 (t,  $J$  = 7.4 Hz, 1H), 7.47 (t,  $J$  = 7.8 Hz, 2H), 5.75 (dd,  $J$  = 10.3, 3.4 Hz, 1H), 5.68 (d,  $J$  = 6.4 Hz, 1H), 5.53–5.48 (m, 2H), 4.52 (ddd,  $J$  = 7.2, 5.8, 1.7 Hz, 1H), 4.07 (qd,  $J$  = 11.5, 6.4 Hz, 2H), 2.15 (s, 3H), 1.99 (s, 3H), 1.90 (s, 3H), 1.75 (s, 3H). <sup>13</sup>C NMR (125 MHz, CDCl<sub>3</sub>):  $\delta$  196.5, 170.3, 170.0, 169.7, 136.1, 133.9, 128.7, 128.6, 71.2, 71.0, 67.9, 67.7, 66.8, 61.7, 20.63, 20.58, 20.5, 20.4. HRMS (ESI): calcd for C<sub>21</sub>H<sub>24</sub>O<sub>10</sub> [M]<sup>+</sup> 436.1369, found 436.1367. m.p. 102–103 °C.

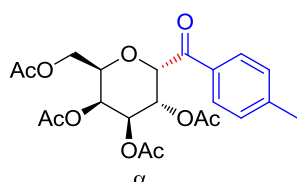

**(2R,3S,4S,5R,6S)-2-(Acetoxymethyl)-6-(4-methylbenzoyl)tetrahydro-2H-pyran-3,4,5-triyl triacetate ( $\alpha$ -28).**

According to the general procedure C, this compound was obtained in (121.5 mg, 0.27 mmol) 90% yield and ratio of  $\alpha$  to  $\beta$  (4.2:1). Colorless oil. Purification by column chromatography (SiO<sub>2</sub>: 30% ethyl acetate in petroleum ether). <sup>1</sup>H NMR (500 MHz, CDCl<sub>3</sub>):  $\delta$  7.80 (d,  $J$  = 8.3 Hz, 2H), 7.24 (d,  $J$  = 8.1 Hz, 2H), 5.75 (dd,  $J$  = 10.4, 3.4 Hz, 1H), 5.63 (d,  $J$  = 6.4 Hz, 1H), 5.51–5.45 (m, 2H), 4.50 (td,  $J$  = 6.5, 1.8 Hz, 1H), 4.08–4.00 (m, 2H), 2.39 (s, 3H), 2.13 (s, 3H), 1.97 (s, 3H), 1.89 (s, 3H), 1.75 (s, 3H). <sup>13</sup>C NMR (125 MHz, CDCl<sub>3</sub>):  $\delta$  195.9, 170.29, 170.26, 170.0, 169.6, 144.9, 133.5, 129.4, 128.7, 71.0, 70.9, 67.8, 67.7, 66.8, 61.6, 21.6, 20.57, 20.52, 20.44, 20.39. HRMS (ESI): calcd for C<sub>22</sub>H<sub>26</sub>O<sub>10</sub> [M]<sup>+</sup> 450.1526, found 450.1525.

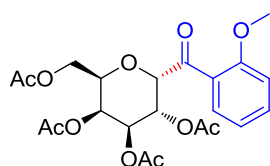

**(2R,3S,4S,5R,6S)-2-(Acetoxymethyl)-6-(2-methoxybenzoyl)tetrahydro-2H-pyran-3,4,5-triyl triacetate ( $\alpha$ -29).**

According to the general procedure C, this compound was obtained in (90.9 mg, 0.195 mmol) 65% yield and ratio of  $\alpha$  to  $\beta$  (4.5:1) as a colorless oil. Purification of the crude material was performed by column chromatography (SiO<sub>2</sub>: 30% ethyl acetate in petroleum ether). <sup>1</sup>H NMR (500 MHz, CDCl<sub>3</sub>):  $\delta$  7.58 (dd,  $J$  = 7.7, 1.8 Hz, 1H), 7.47 (ddd,  $J$  = 8.9, 7.4, 1.8 Hz, 1H), 7.00 (t,  $J$  = 7.5 Hz, 1H), 6.93 (d,  $J$  = 8.4 Hz, 1H), 5.83 (d,  $J$  = 6.6 Hz, 1H), 5.59 (dd,  $J$  = 10.1, 3.3 Hz, 1H), 5.52–5.49 (m, 2H), 4.68 (td,  $J$  = 6.5, 2.0 Hz, 1H), 4.12–4.03 (m, 2H), 3.85 (s, 3H), 2.12 (s, 3H), 1.98 (s, 3H), 1.76 (s, 3H), 1.72 (s, 3H). <sup>13</sup>C NMR (125 MHz, CDCl<sub>3</sub>):  $\delta$  199.5, 170.4, 170.0, 169.9, 169.7, 158.2, 134.3, 130.6, 127.6, 121.0, 111.5, 74.0, 70.8, 68.1, 67.9, 66.6, 61.7, 55.6, 20.64, 20.60, 20.58, 20.3. HRMS (ESI): calcd for C<sub>22</sub>H<sub>26</sub>O<sub>11</sub> [M]<sup>+</sup> 466.1475, found 466.1472.

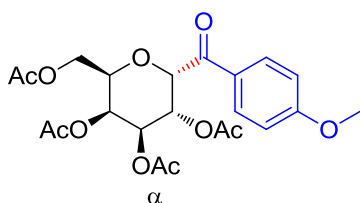

**(2*R*,3*S*,4*S*,5*R*,6*S*)-2-(Acetoxymethyl)-6-(4-methoxybenzoyl)tetrahydro-2*H*-pyran-3,4,5-triyl triacetate ( $\alpha$ -30).**

According to the general procedure C, this compound was obtained in (104.9 mg, 0.225 mmol) 75% yield and ratio of  $\alpha$  to  $\beta$  (3.6:1) as a white solid. Purification of the crude material was performed by column chromatography (SiO<sub>2</sub>: 30% ethyl acetate in petroleum ether). <sup>1</sup>H NMR (500 MHz, CDCl<sub>3</sub>):  $\delta$ 7.92–7.90 (m, 2H), 6.93–6.91 (m, 2H), 5.79 (dd,  $J = 10.4, 3.4$  Hz, 1H), 5.62 (d,  $J = 6.4$  Hz, 1H), 5.50 (dd,  $J = 3.4, 1.5$  Hz, 1H), 5.46 (dd,  $J = 10.1, 6.3$  Hz, 1H), 4.50 (td,  $J = 6.4, 1.7$  Hz, 1H), 4.08–4.00 (m, 2H), 3.85 (s, 3H), 2.13 (s, 3H), 1.98 (s, 3H), 1.90 (s, 3H), 1.79 (s, 3H). <sup>13</sup>C NMR (125 MHz, CDCl<sub>3</sub>):  $\delta$ 194.5, 170.4, 170.3, 170.0, 169.7, 164.1, 132.2, 131.1, 128.9, 113.9, 70.8, 67.9, 67.7, 66.9, 61.7, 55.5, 20.6, 20.55, 20.50, 20.48. HRMS (ESI): calcd for C<sub>22</sub>H<sub>26</sub>O<sub>11</sub> [M]<sup>+</sup> 466.1475, found 466.1477. m.p. 145–146 °C

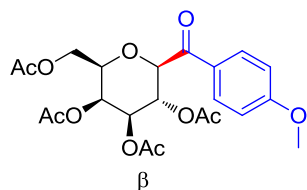

**(2*R*,3*S*,4*S*,5*R*,6*R*)-2-(Acetoxymethyl)-6-(4-methoxybenzoyl)tetrahydro-2*H*-pyran-3,4,5-triyl triacetate ( $\beta$ -30).**

<sup>1</sup>H NMR (500 MHz, CDCl<sub>3</sub>):  $\delta$ 8.02–8.00 (m, 2H), 6.95–6.93 (m, 2H), 5.67 (t,  $J = 10.0$  Hz, 1H), 5.50 (d,  $J = 3.3$  Hz, 1H), 5.19 (dd,  $J = 10.1, 3.4$  Hz, 1H), 4.63 (d,  $J = 9.8$  Hz, 1H), 4.16–4.08 (m, 2H), 3.88 (s, 3H), 2.19 (s, 3H), 2.05 (s, 3H), 2.00 (s, 3H), 1.86 (s, 3H). <sup>13</sup>C NMR (125 MHz, CDCl<sub>3</sub>):  $\delta$ 194.5, 170.4, 170.3, 170.1, 169.7, 164.1, 132.2, 131.1, 129.0, 113.9, 70.9, 67.9, 67.8, 66.9, 61.7, 55.5, 20.6, 20.55, 20.51, 20.48. HRMS (ESI): calcd for C<sub>22</sub>H<sub>26</sub>O<sub>11</sub> [M]<sup>+</sup> 466.1475, found 466.1474.

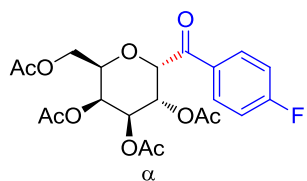

**(2*R*,3*S*,4*S*,5*R*,6*S*)-2-(Acetoxymethyl)-6-(4-fluorobenzoyl)tetrahydro-2*H*-pyran-3,4,5-triyl triacetate ( $\alpha$ -31).**

According to the general procedure C, this compound was obtained in (110.4 mg, 0.243 mmol) 81% yield and ratio of  $\alpha$  to  $\beta$  (5.8:1) as a white solid. Purification of the crude material was performed by column chromatography (SiO<sub>2</sub>: 30% ethyl acetate in petroleum ether). <sup>1</sup>H NMR (500 MHz, CDCl<sub>3</sub>):  $\delta$ 7.98–7.95 (m, 2H), 7.13 (t,  $J = 8.5$  Hz, 2H), 5.74 (dd,  $J = 10.2, 3.4$  Hz, 1H), 5.60 (d,  $J = 6.2$  Hz, 1H), 5.50–5.45 (m, 2H), 4.40 ((td,  $J = 6.2, 1.6$  Hz, 1H), 4.11–3.98 (m, 2H), 2.13 (s, 3H), 1.98 (s, 3H), 1.89 (s, 3H), 1.80 (s, 3H). <sup>13</sup>C NMR (125 MHz, CDCl<sub>3</sub>):  $\delta$ 194.6, 170.34, 170.3, 170.0, 169.7, 167.2, 165.1, 132.34, 132.31,

131.64, 131.57, 116.0, 115.9, 71.4, 71.1, 67.8, 67.7, 66.9, 61.6, 20.65, 20.60, 20.54, 20.51. HRMS  
(ESI): calcd for C<sub>21</sub>H<sub>23</sub>FO<sub>10</sub> [M]<sup>+</sup> 454.1275, found 454.1271. m.p. 107–108 °C.

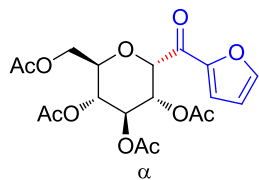

(2*R*,3*R*,4*S*,5*R*,6*S*)-2-(Acetoxymethyl)-6-(furan-2-carbonyl)tetrahydro-2*H*-pyran-3,4,5-triyl triacetate ( $\alpha$ ).

Following the general procedure C except that Ni(ClO<sub>4</sub>)<sub>2</sub> (20 mol%), 4b (20 mol%) and furan-2-carbonyl chloride (150 mol%) were used.

Purification of the crude material was performed by column chromatography (SiO<sub>2</sub>: 30% ethyl acetate in petroleum ether). The yield of the title compound was estimated to be 25% (for  $\alpha$  product only) due to inseparable impurities using trimehtyl(phenyl)silane as the internal standard. For the same reason, the ratio of  $\alpha$  to  $\beta$  was not determined. <sup>1</sup>H NMR (500 MHz, Chloroform-*d*) for the  $\alpha$  anomer:  $\delta$  7.65 (s, 1H), 7.31 (d, *J* = 14.0 Hz, 1H), 6.58(s, 1H), 5.79 (t, *J* = 9.2 Hz, 1H), 5.42 (d, *J* = 6.6 Hz, 1H), 5.30 (t, *J* = 8.0 Hz, 1H), 5.09 (t, *J* = 9.3 Hz, 1H), 4.57-4.55 (m, 1H), 4.27 (dd, *J* = 25.9, 9.0 Hz, 1H), 4.22 (dd, *J* = 4.6 Hz, 1H), 4.08 (d, *J* = 12.6 Hz, 1H), 2.10 (s, 3H), 2.04 (s, 3H), 2.02(s, 3H), 1.83 (s, 3H), 1.25 (s, 3H).

## References

- (1) Battilocchio, C.; Baumann, M.; Baxendale, IR.; Kitching, MO.; Ley, S. V.; Tappin, N. D. C.; Biava, M. *Synthesis*. **2012**, *44*, 635.
- (2) Redlich, M.; Hossain, M. M. *Tetrahedron Letters*. **2004**, *45*, 8987–8990.
- (3) (a) Nishiyama, H.; Kondo, M.; Nakamura, T.; Itoh, K. *Organometallics*. **1991**, *10*, 500. (b)

- Nishiyama, H.; Soeda, N.; Naito, T.; Motoyama, Y. *Tetrahedron Asymm.* **1998**, *9*, 2865. (c)  
Müller, P.; Chappellet, S. *Helv. Chim. Acta* . **2005**, *88*, 1010.
- (4) Kawashima, T.; Takao, T.; Suzuki, H. *J. Am. Chem. Soc.* **2007**, *129*, 11006.
- (5) De Crisci, A.; Chung, K.; Oliver, A.; Waymouth, R. *Organometallics*. **2013**, *32*, 2257.
- (6) Bandgar, B. P.; Pandit, S. S. *Tetrahedron Letters*. **2003**, *44*, 2331.
- (7) (a) Bartoli, G.; Bosco, M.; Carlone, A. *Synthesis* **2007**, *22*, 3489. (b) Cirriez, V.; Rasson, C.; Riant, O. *Adv. Synth. Catal.* **2013**, *355*, 3137.
- (8) (a) Yin, H.; Zhao, C.; You, H.; Lin, K.; Gong, H. G. *Chem. Commun.* **2012**, *48*, 7034–7036. (b) Wu, F.; Lu, W.; Qian, Q.; Ren, Q.; Gong, H. G. *Org. Lett.* **2012**, *14*, 3044-3047.
- (9) Kondo, T. *J. Org. Chem.* 1990, *55*, 1286.

## **Spectral Data for New Compounds**

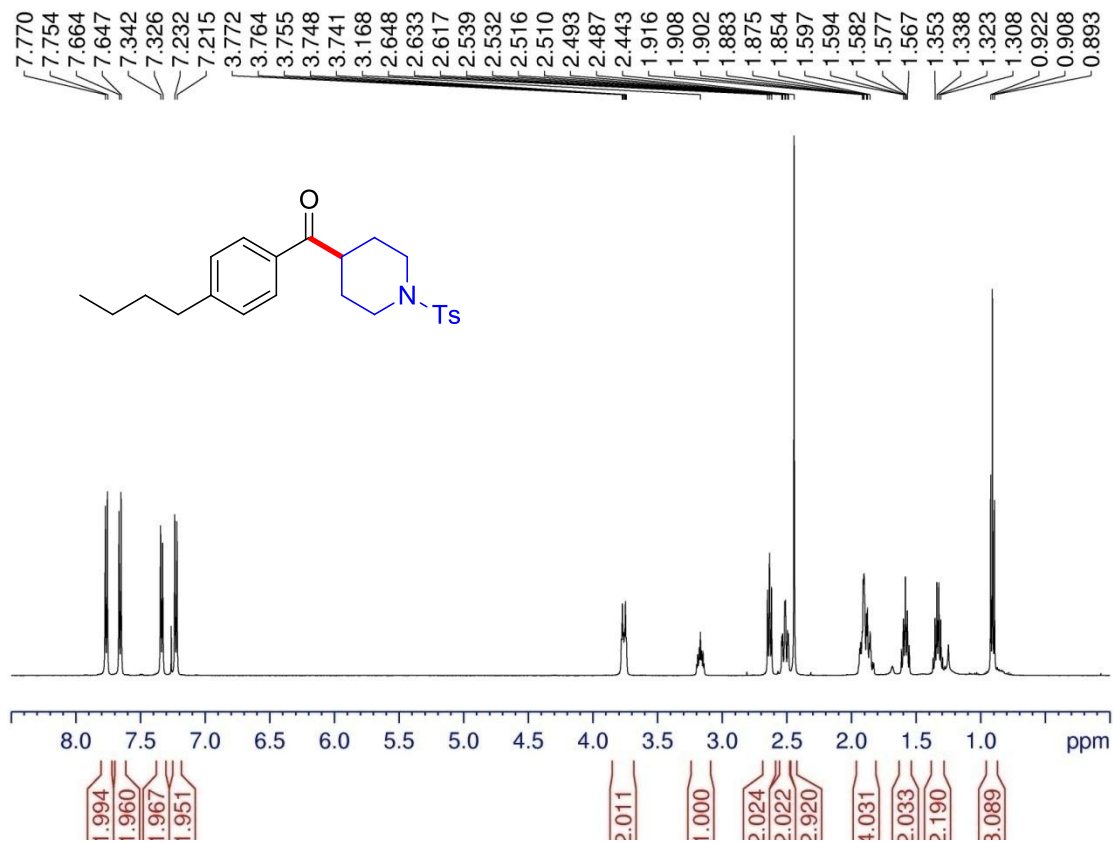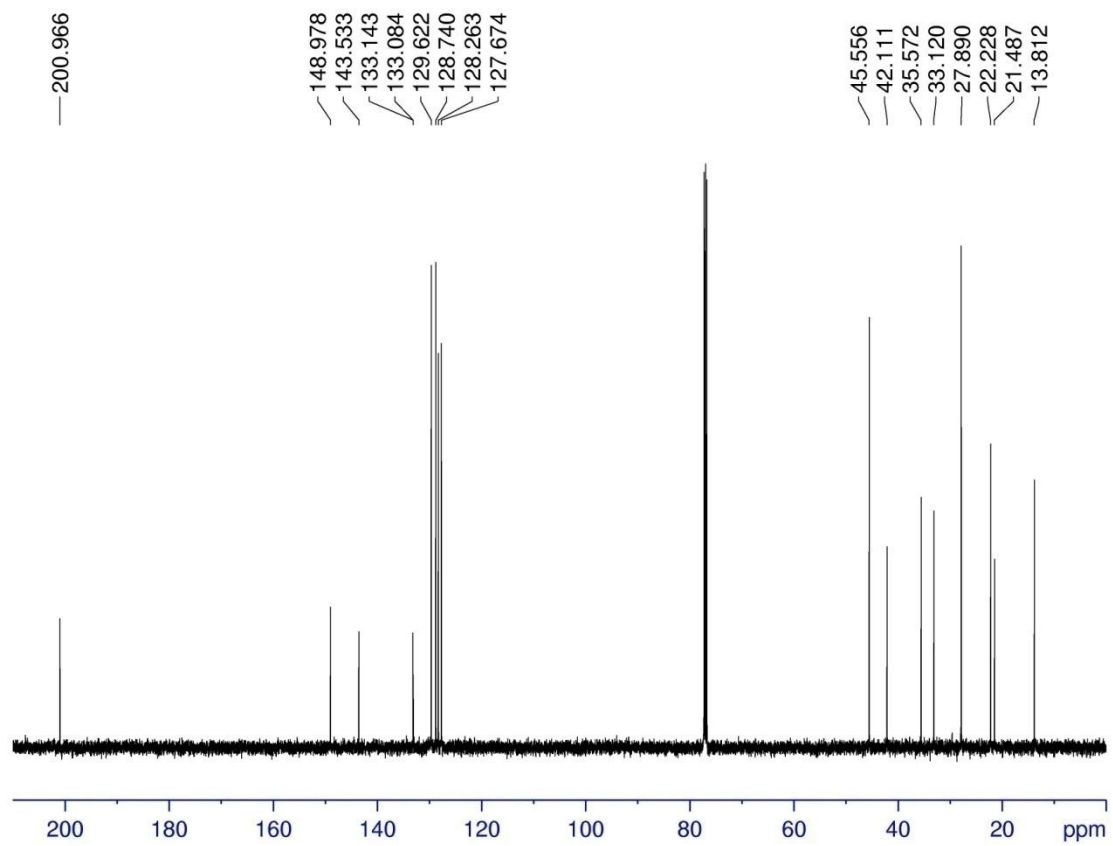

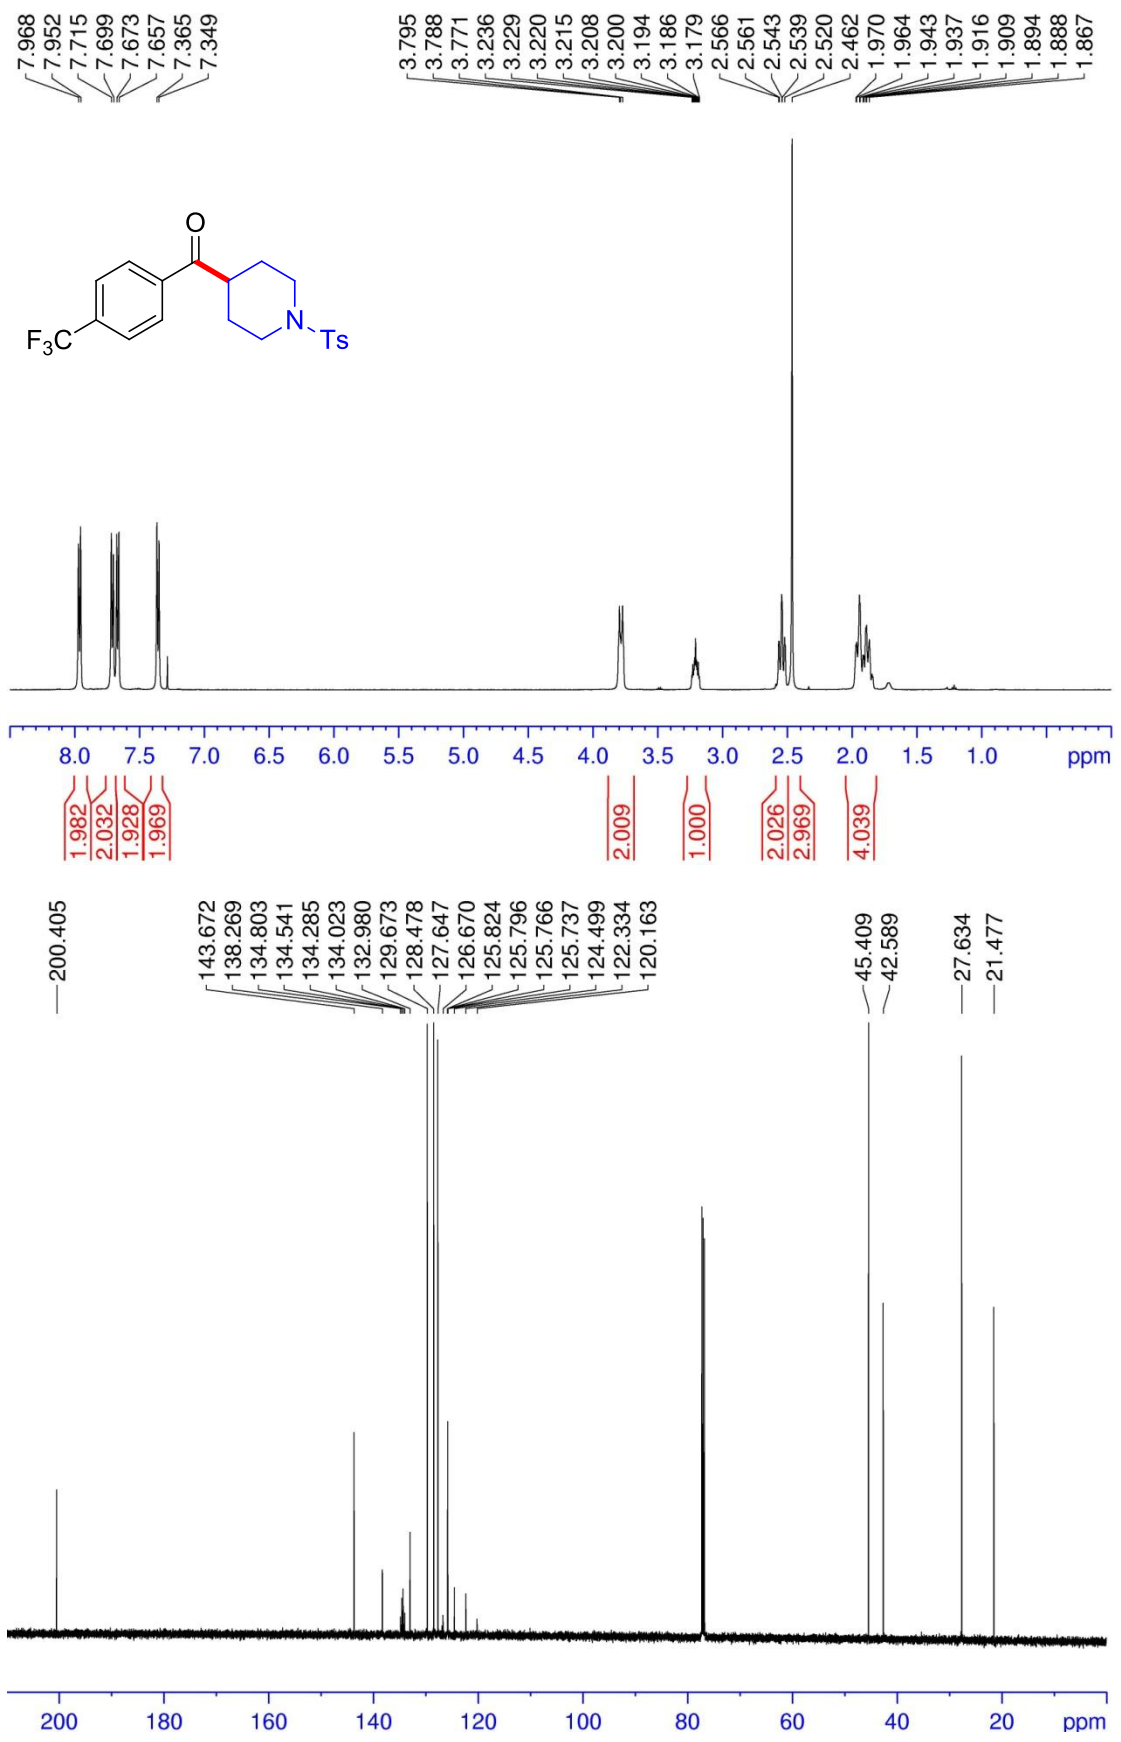

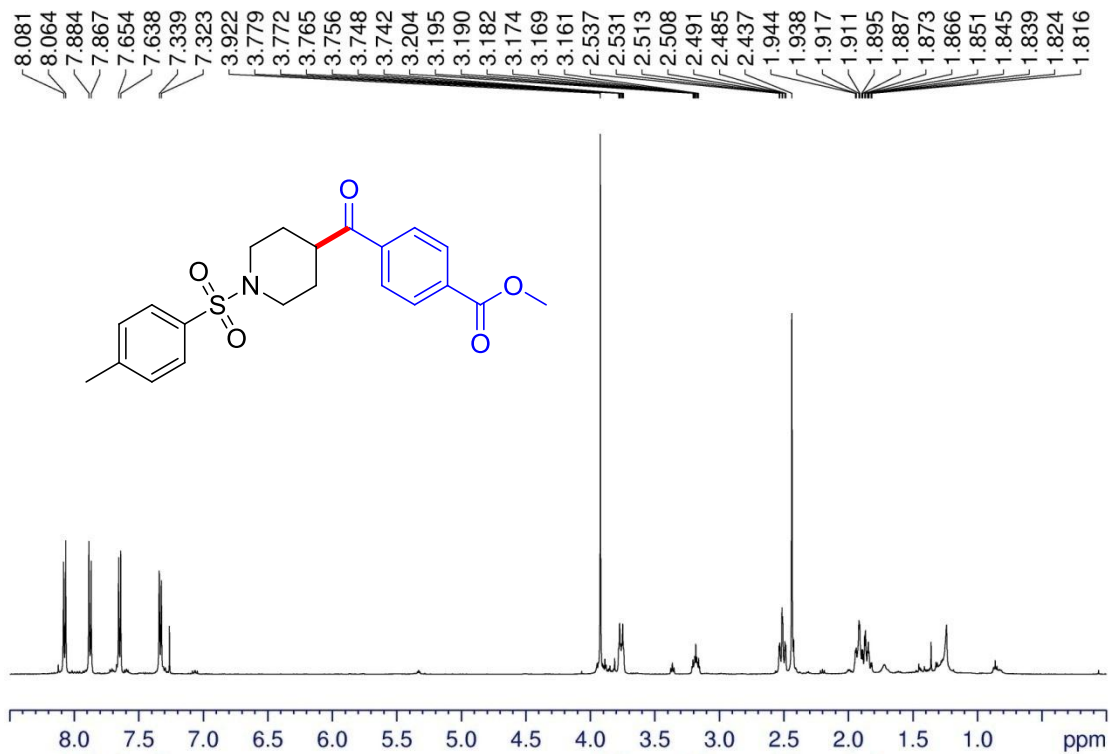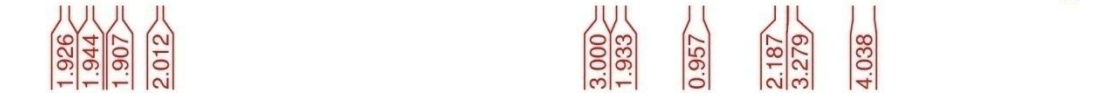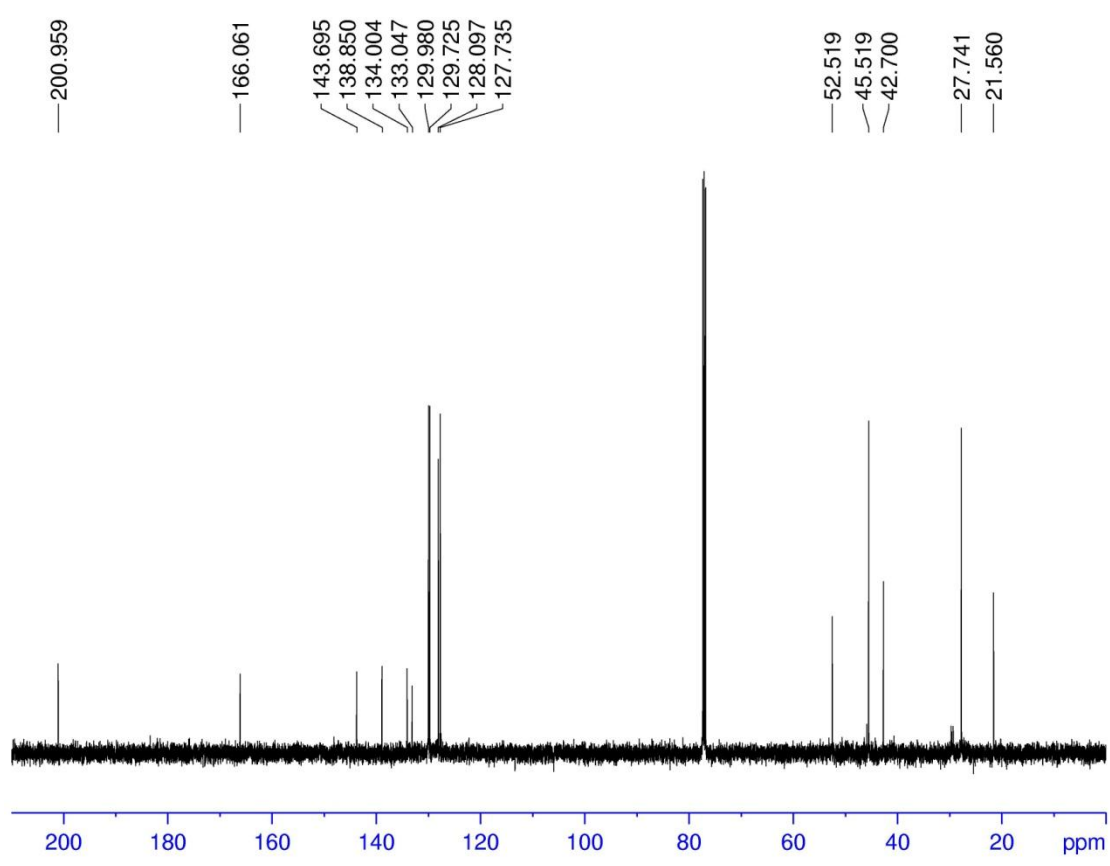

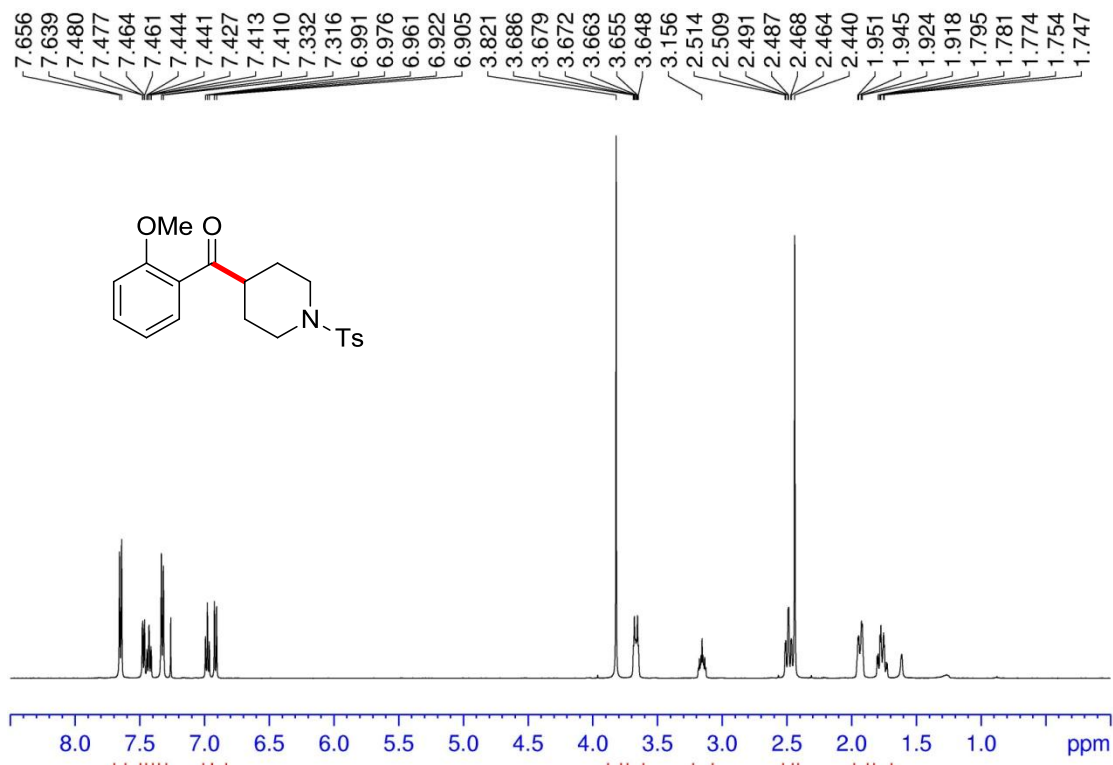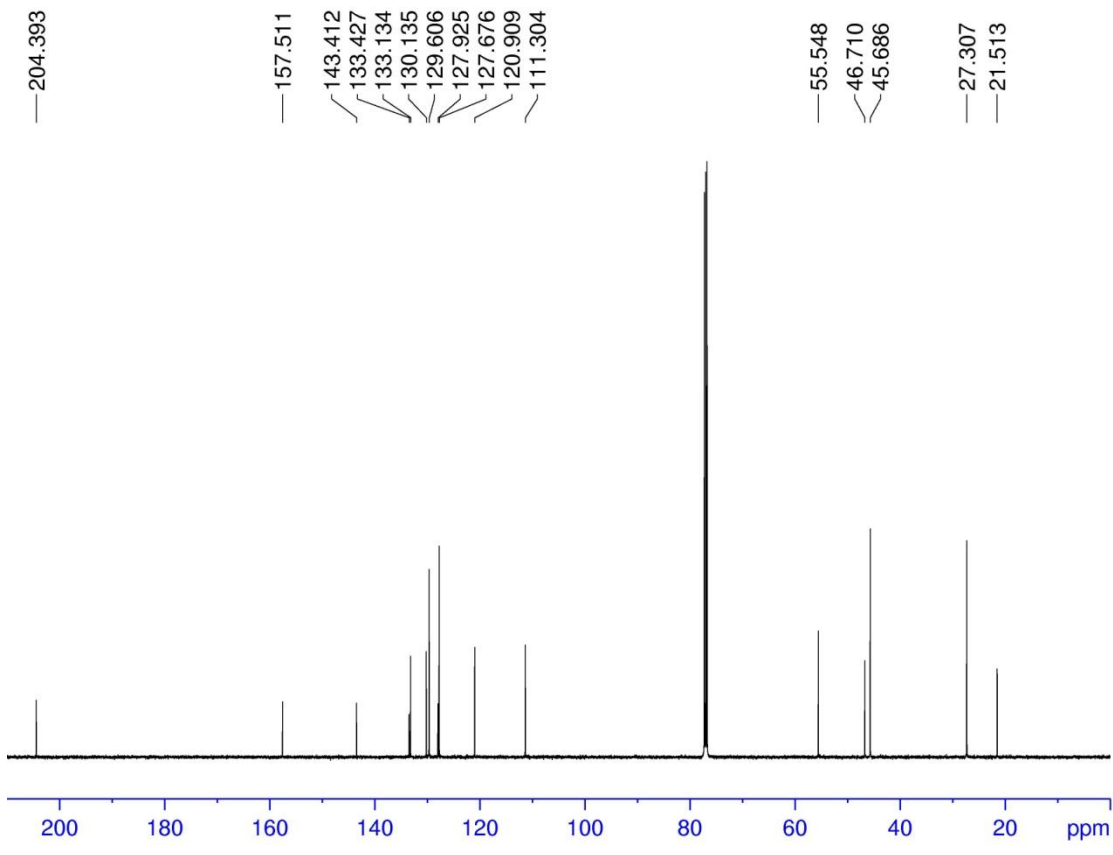



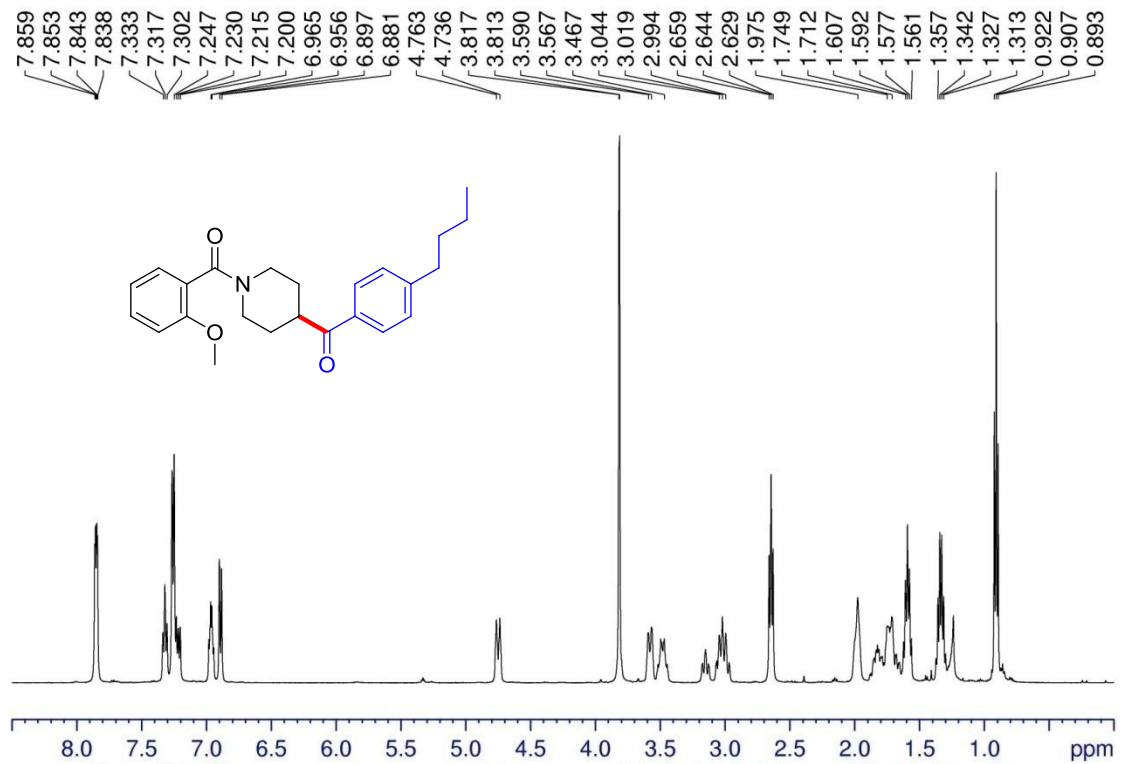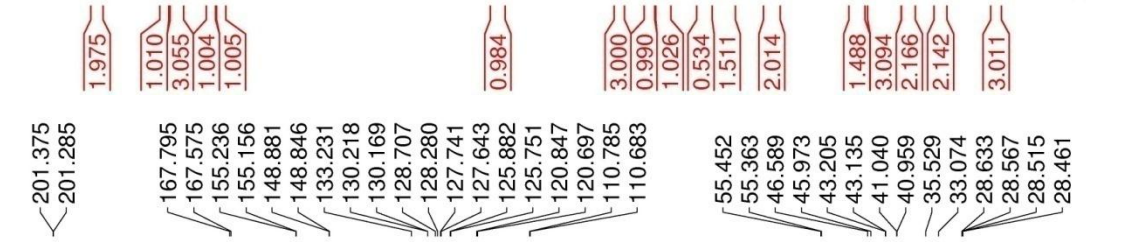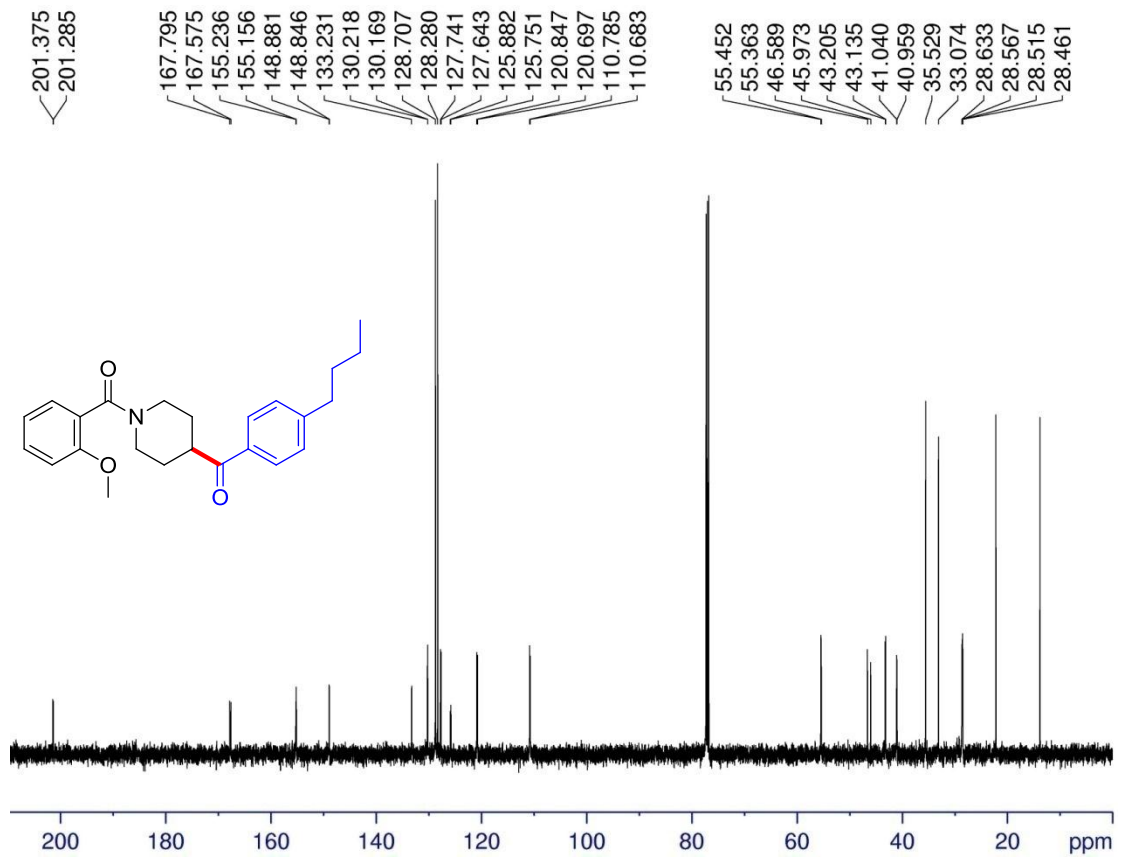

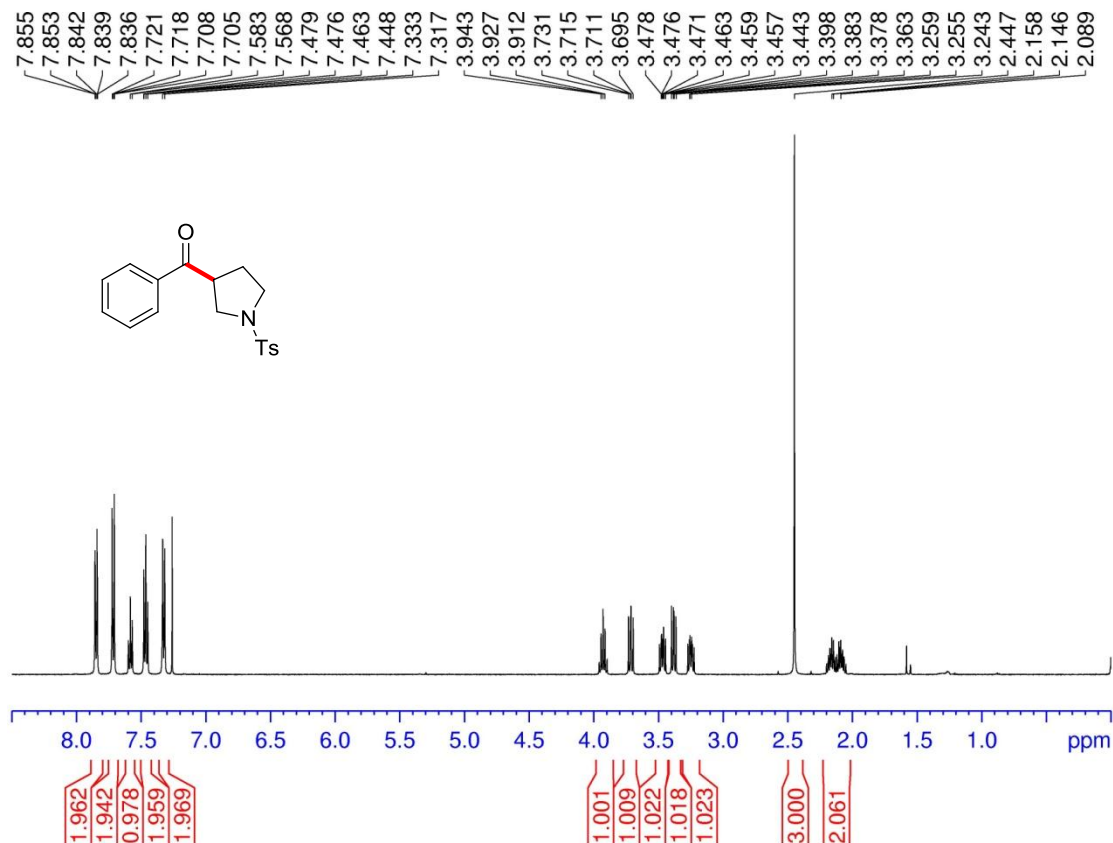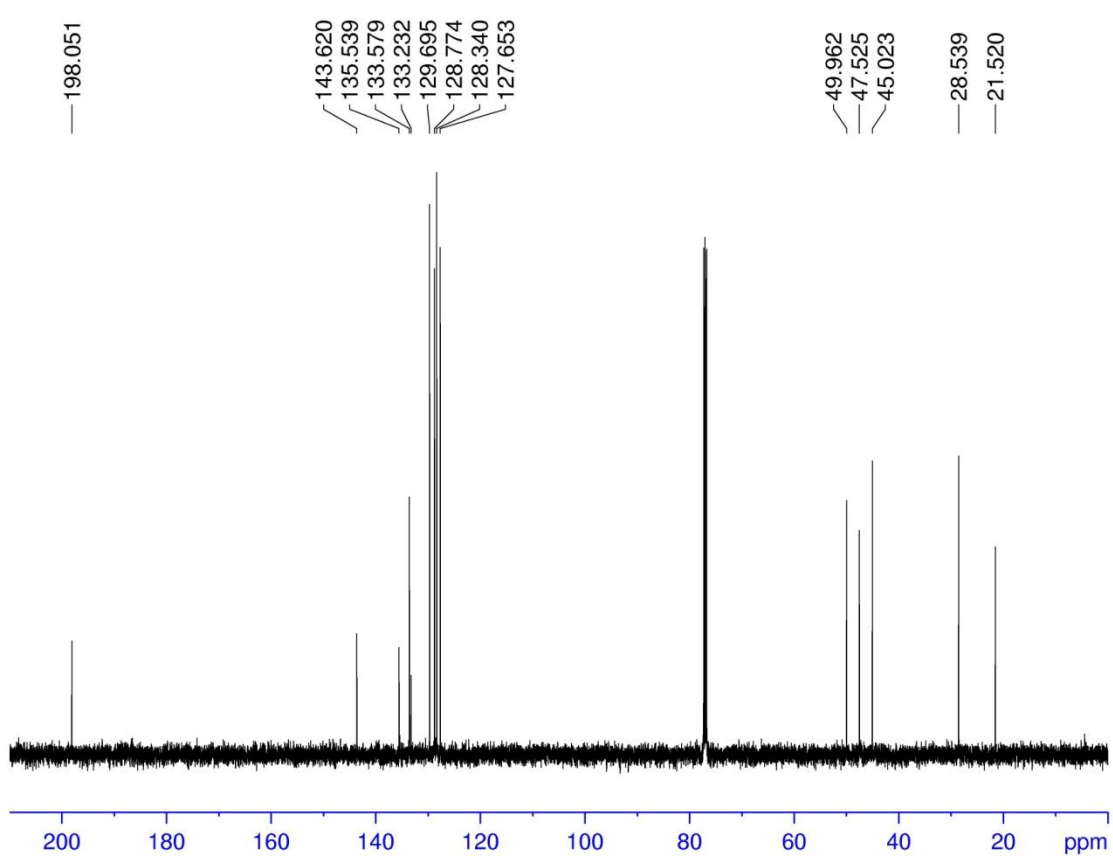

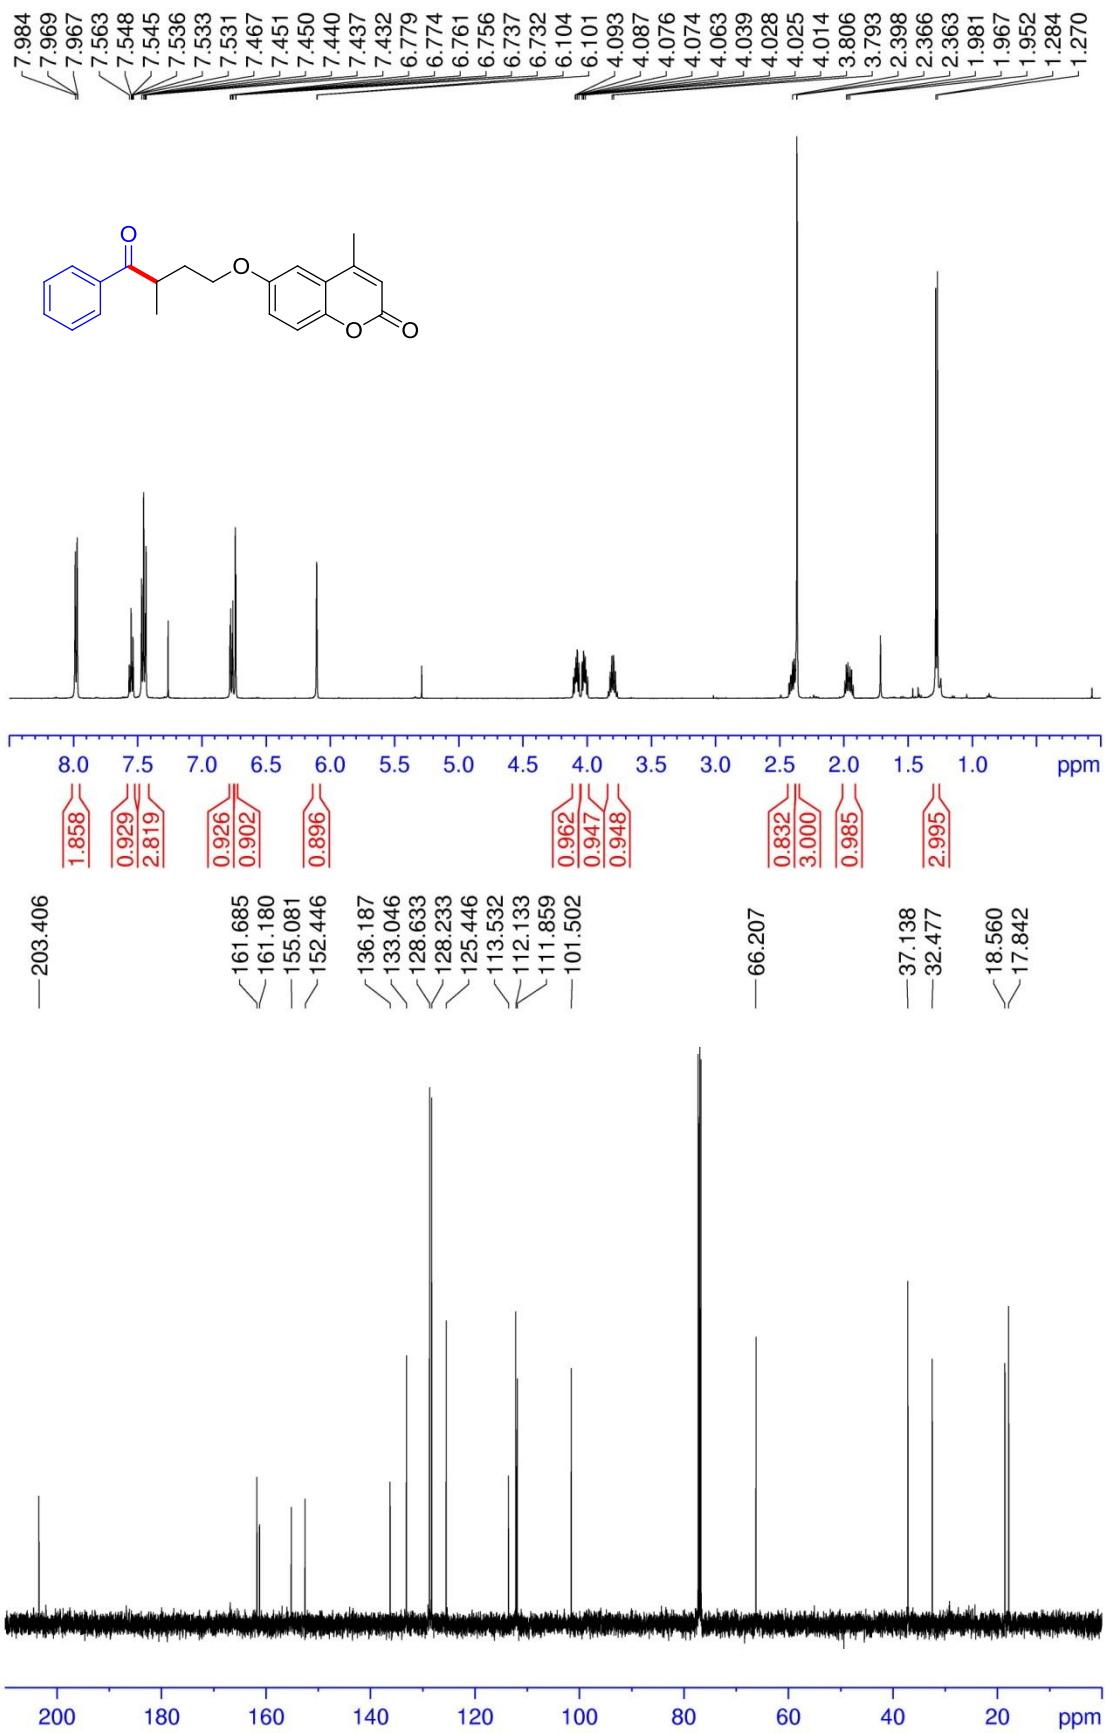

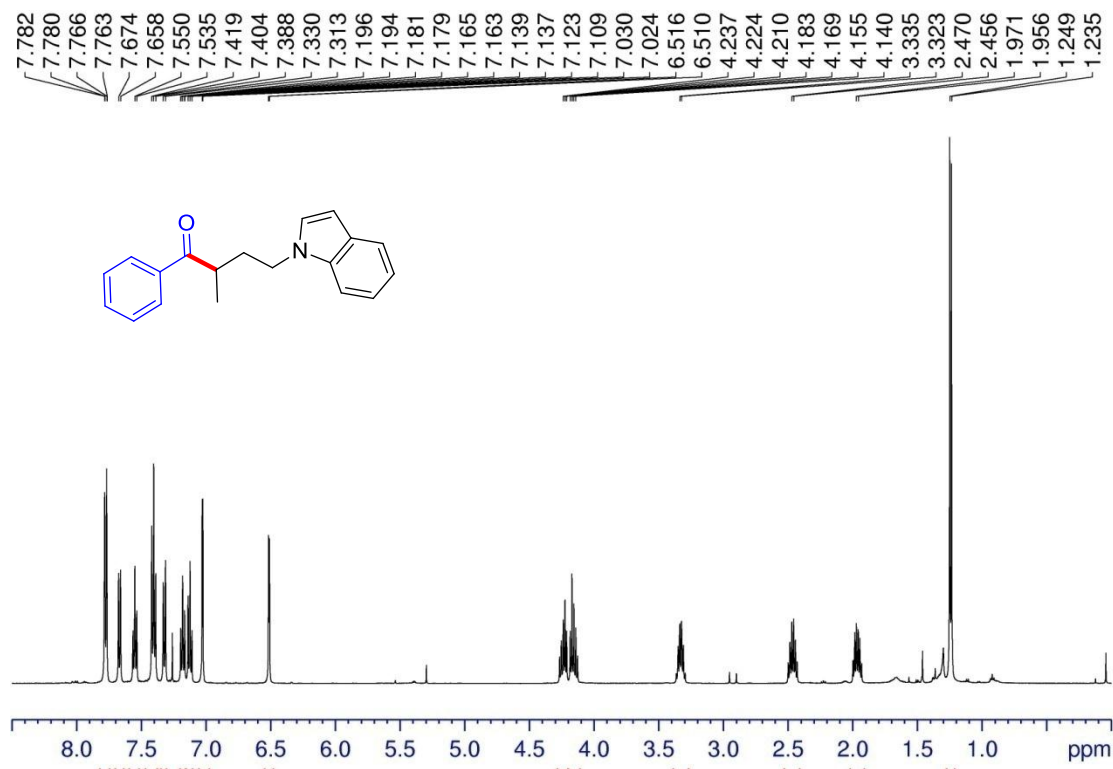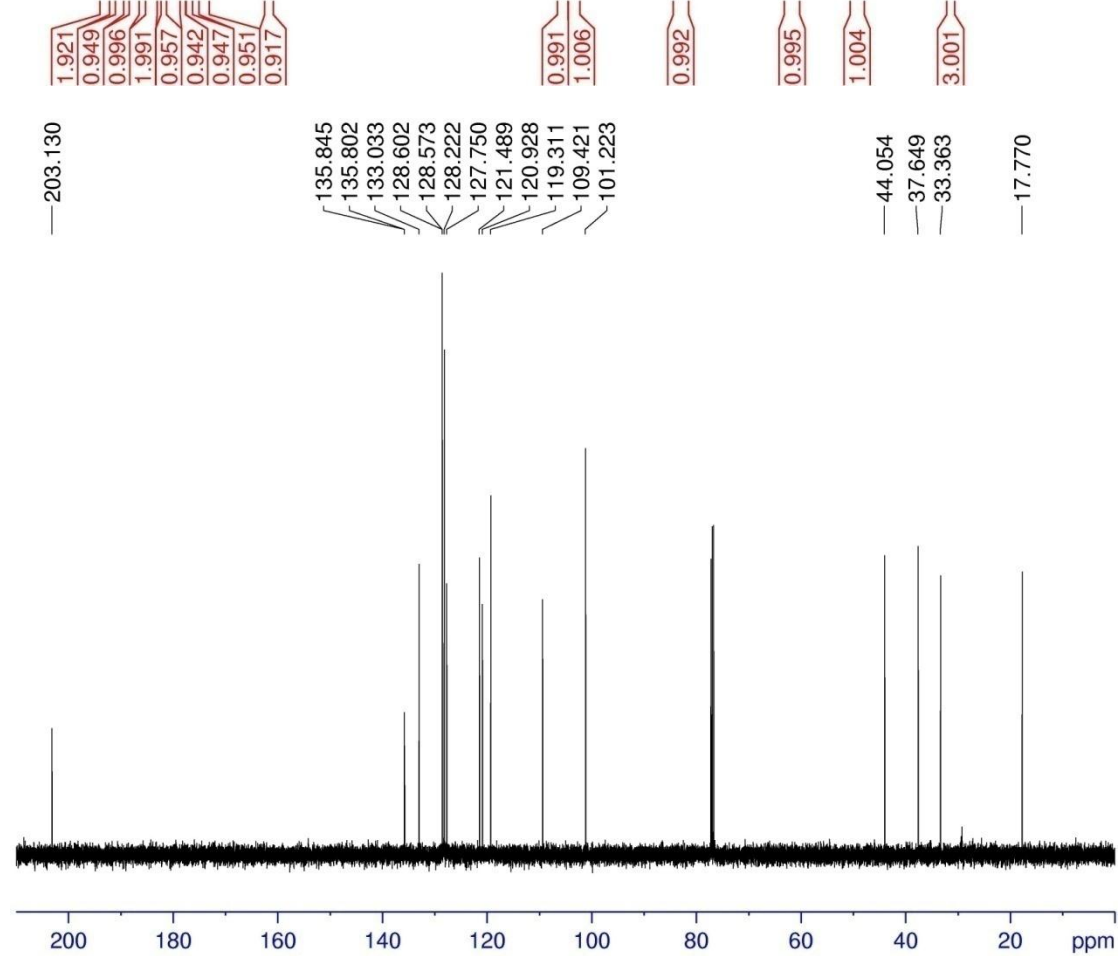

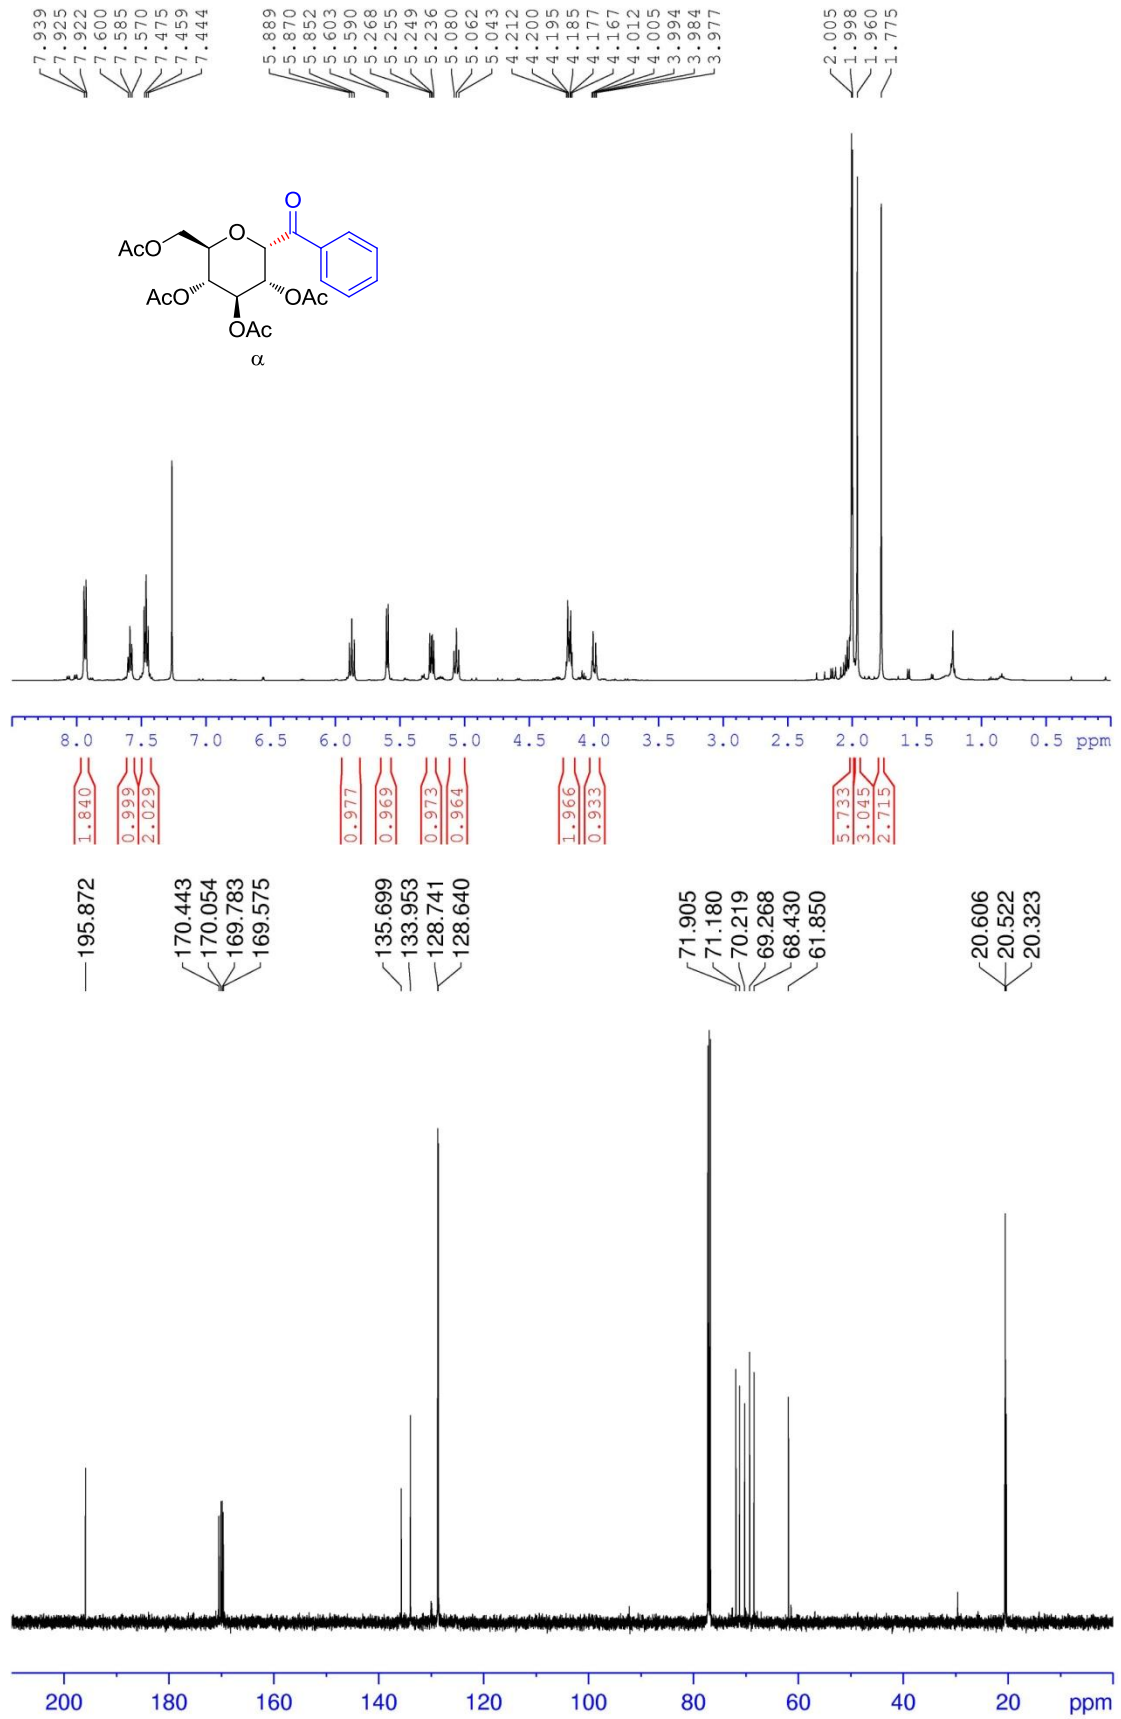

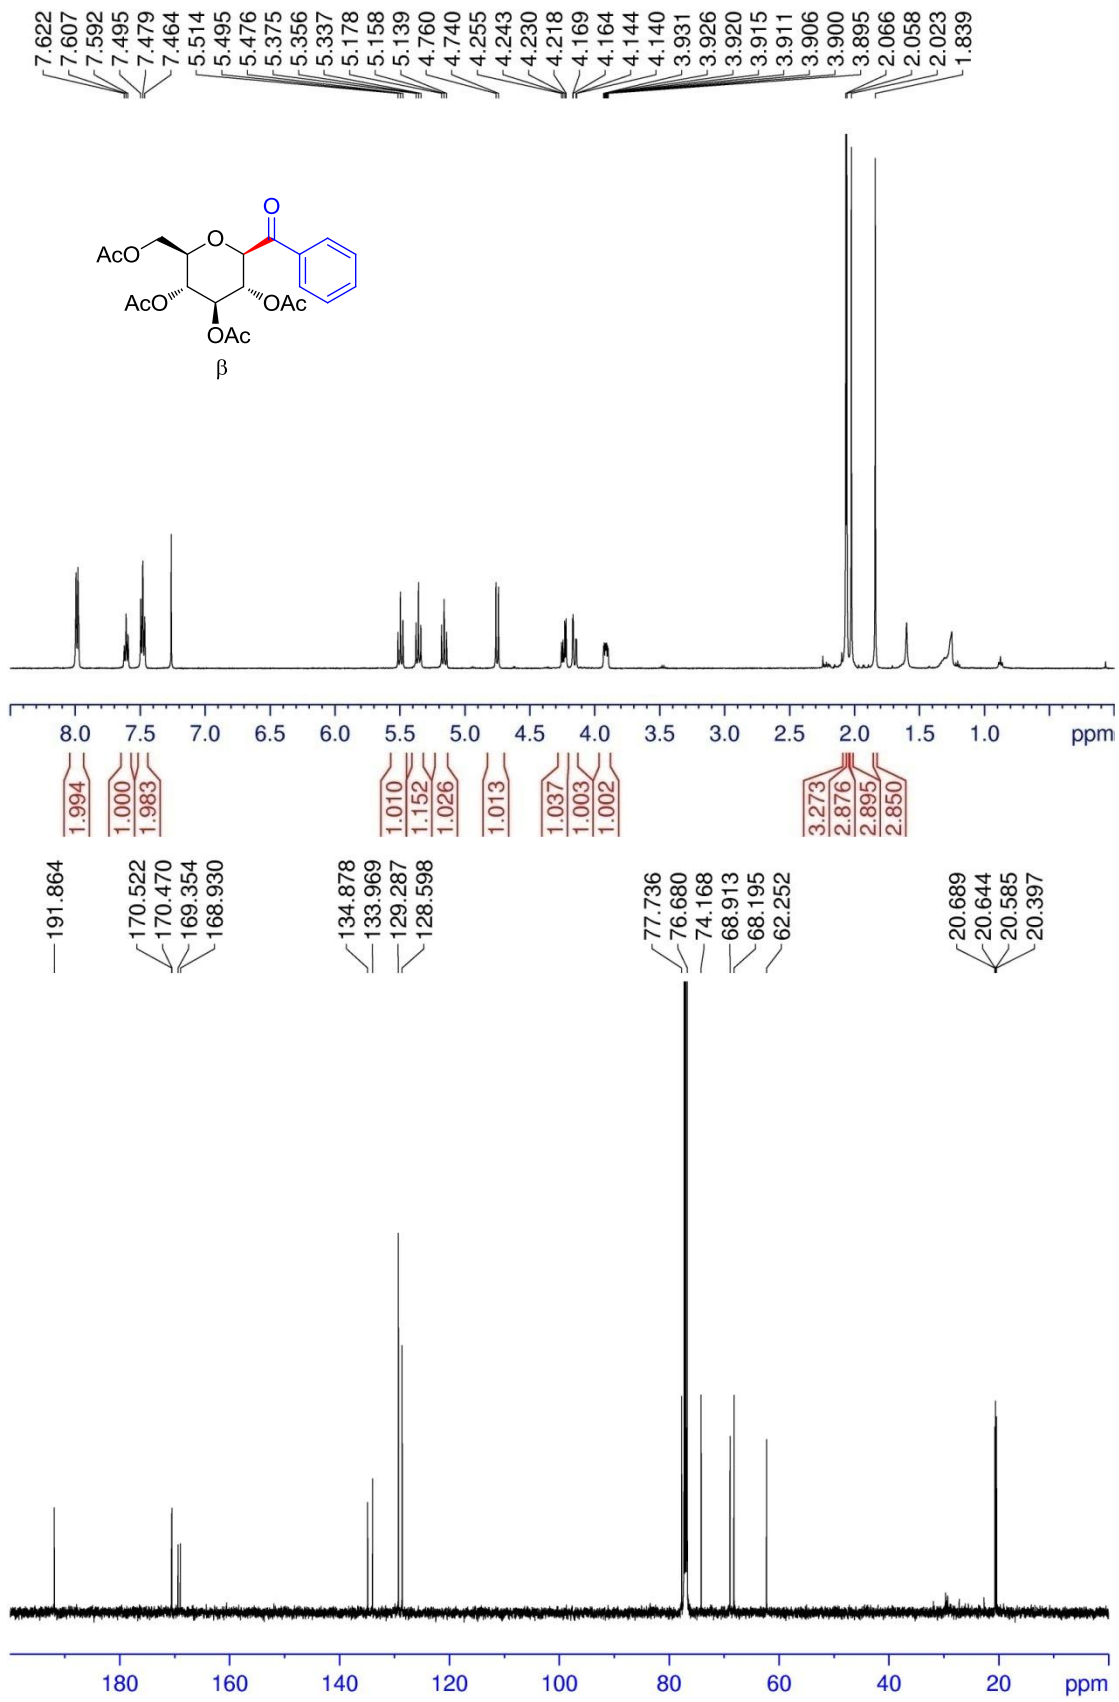

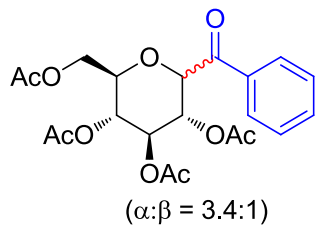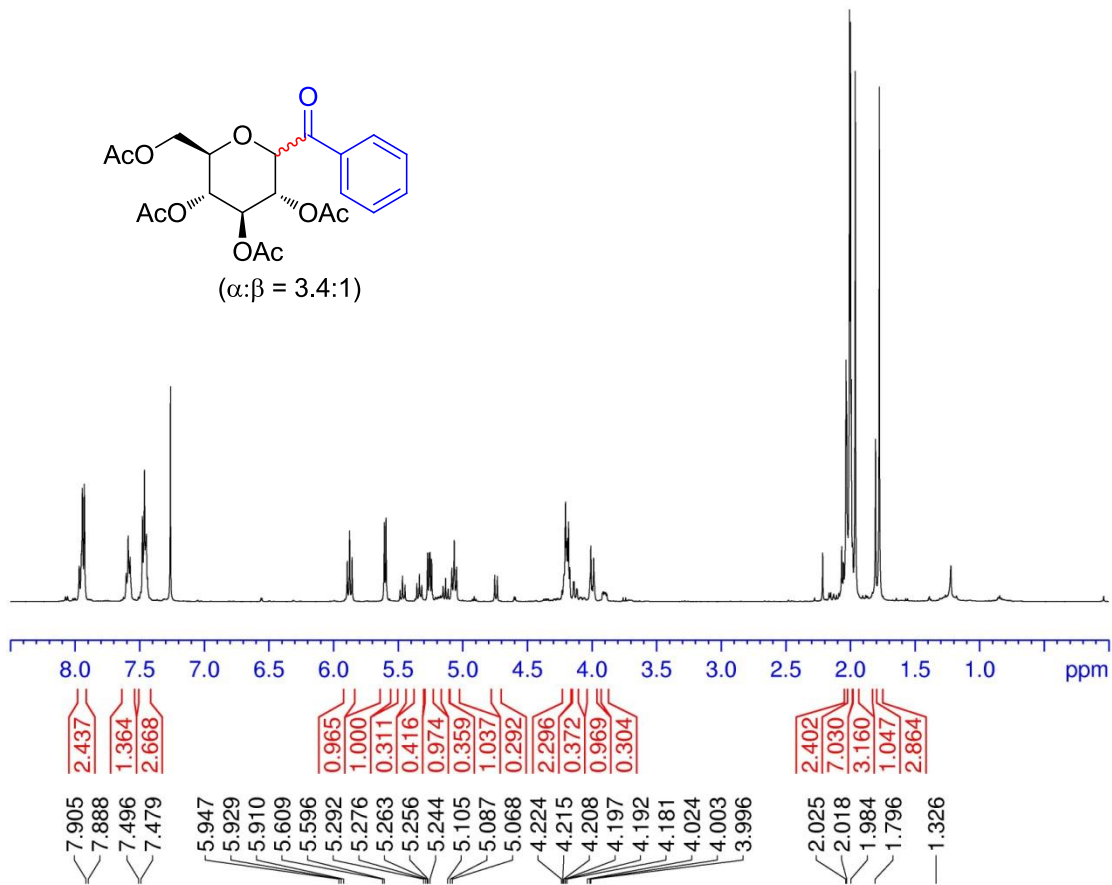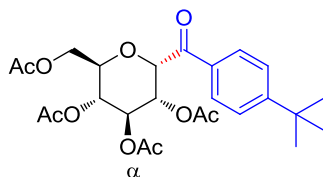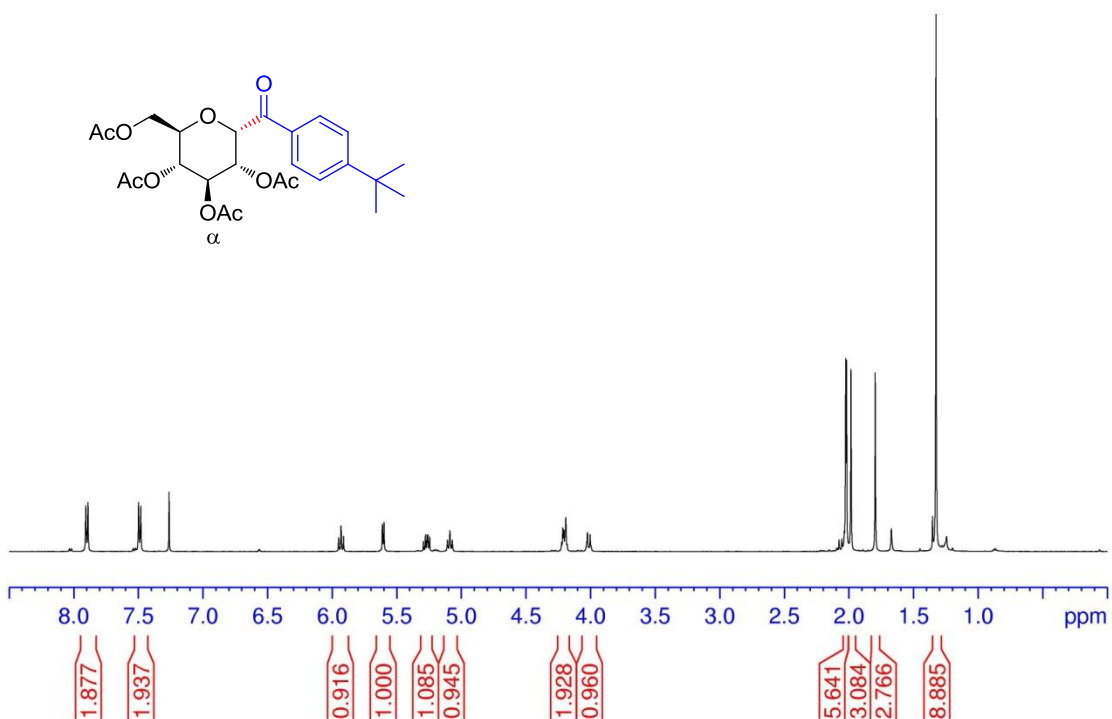



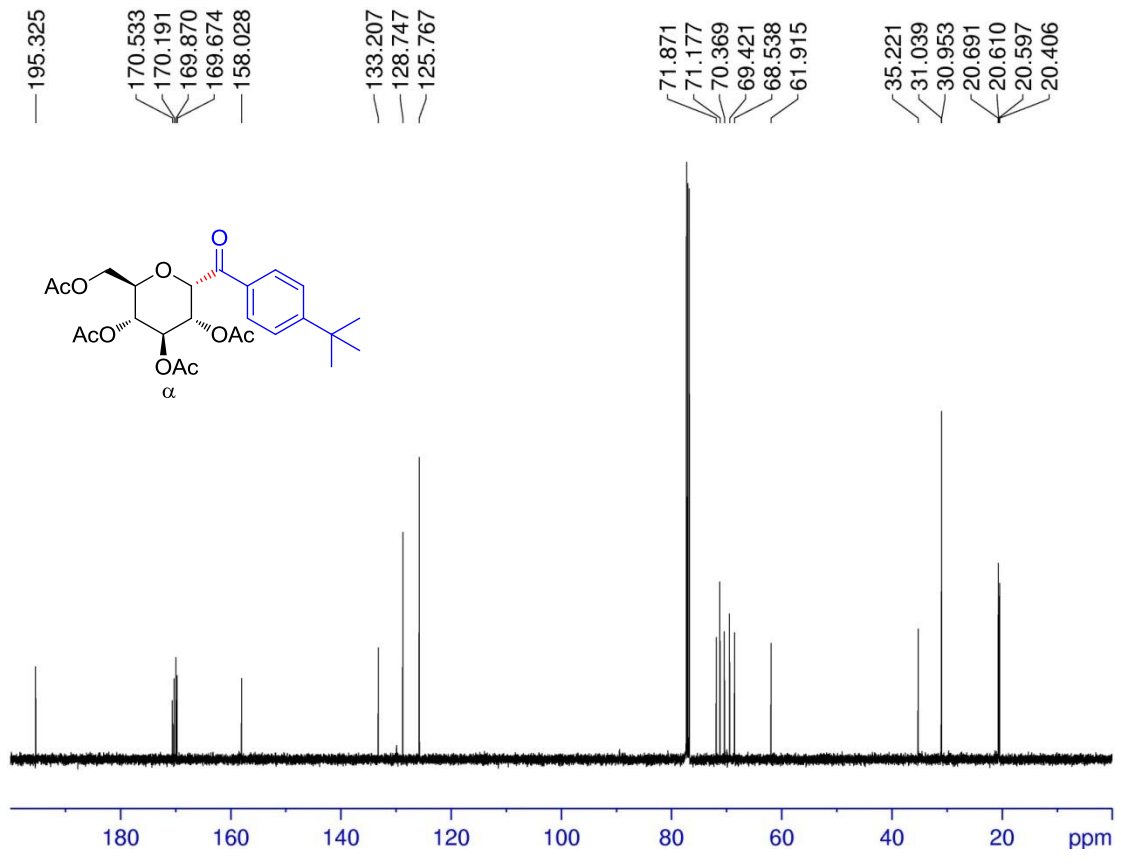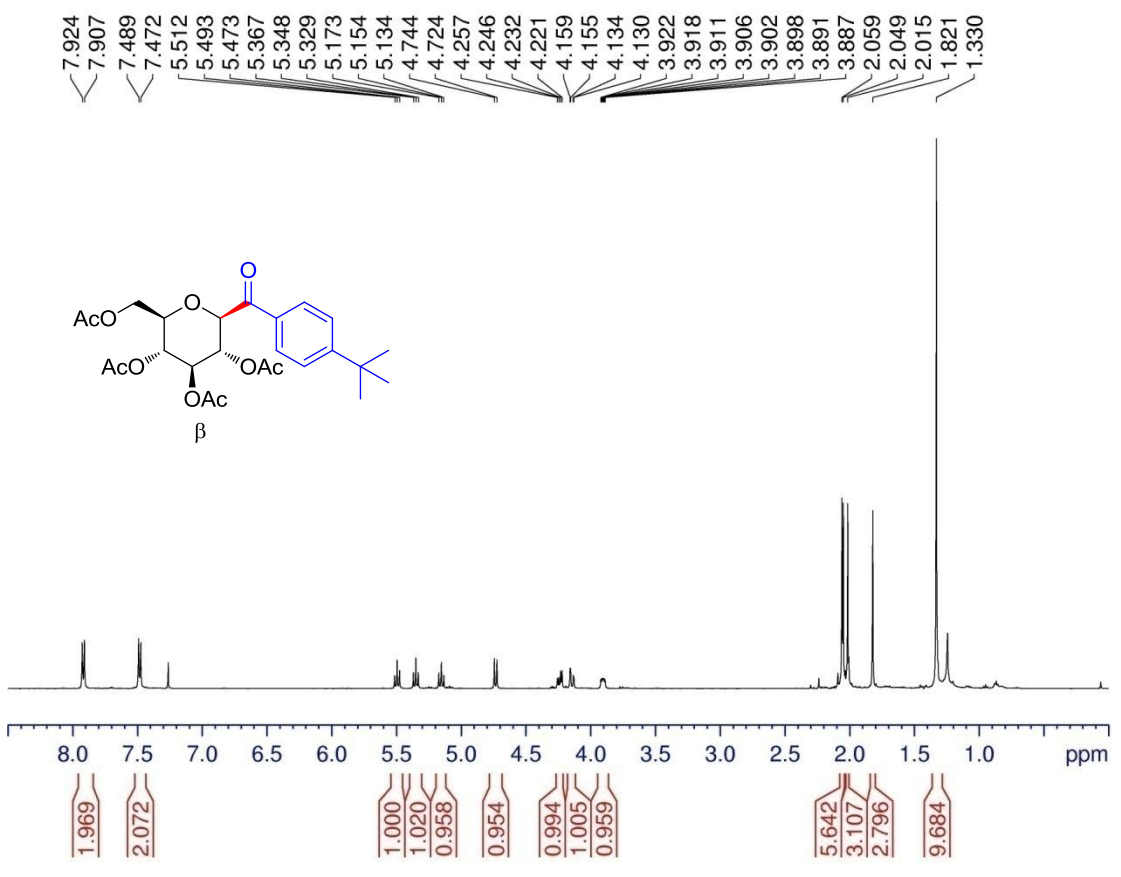



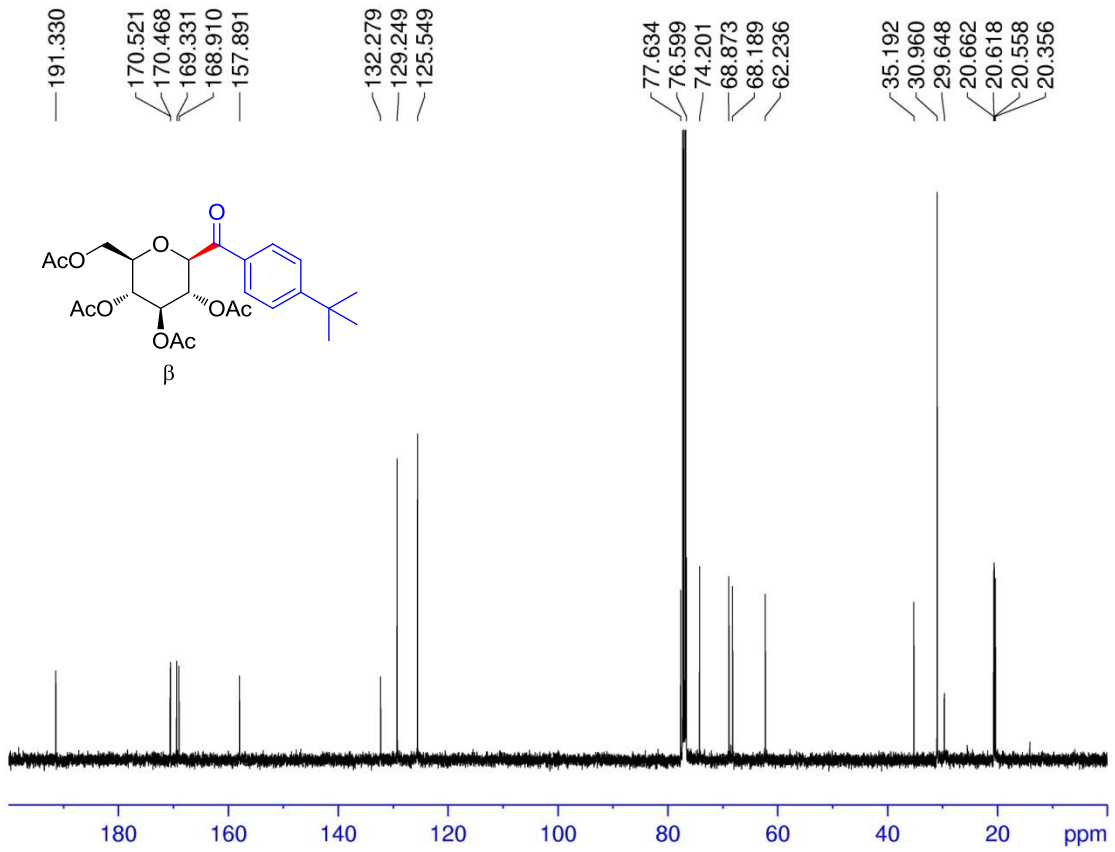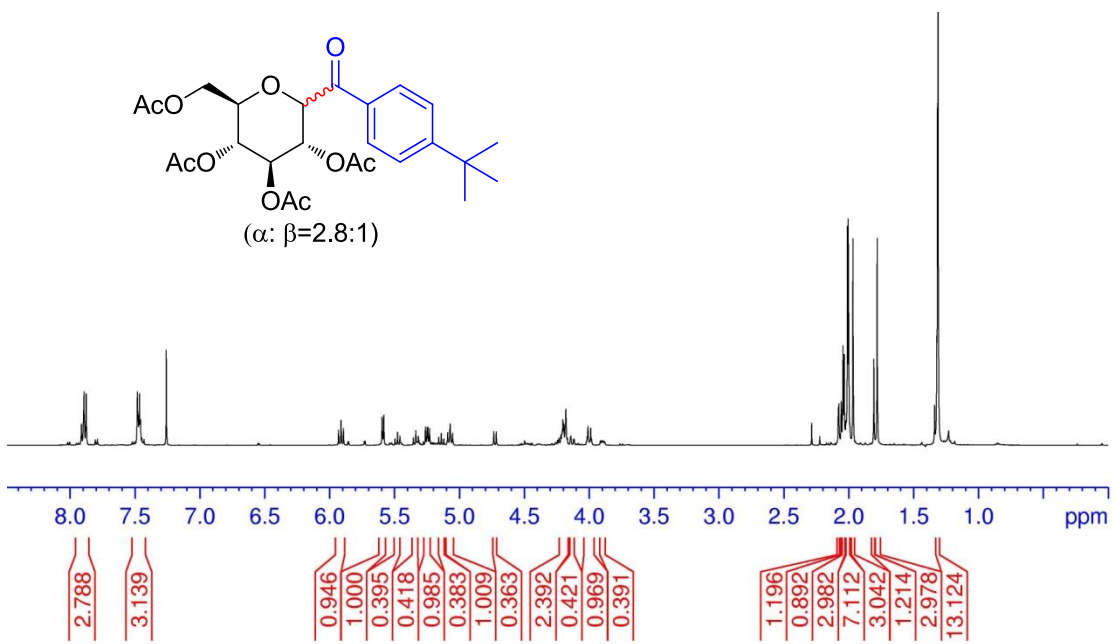

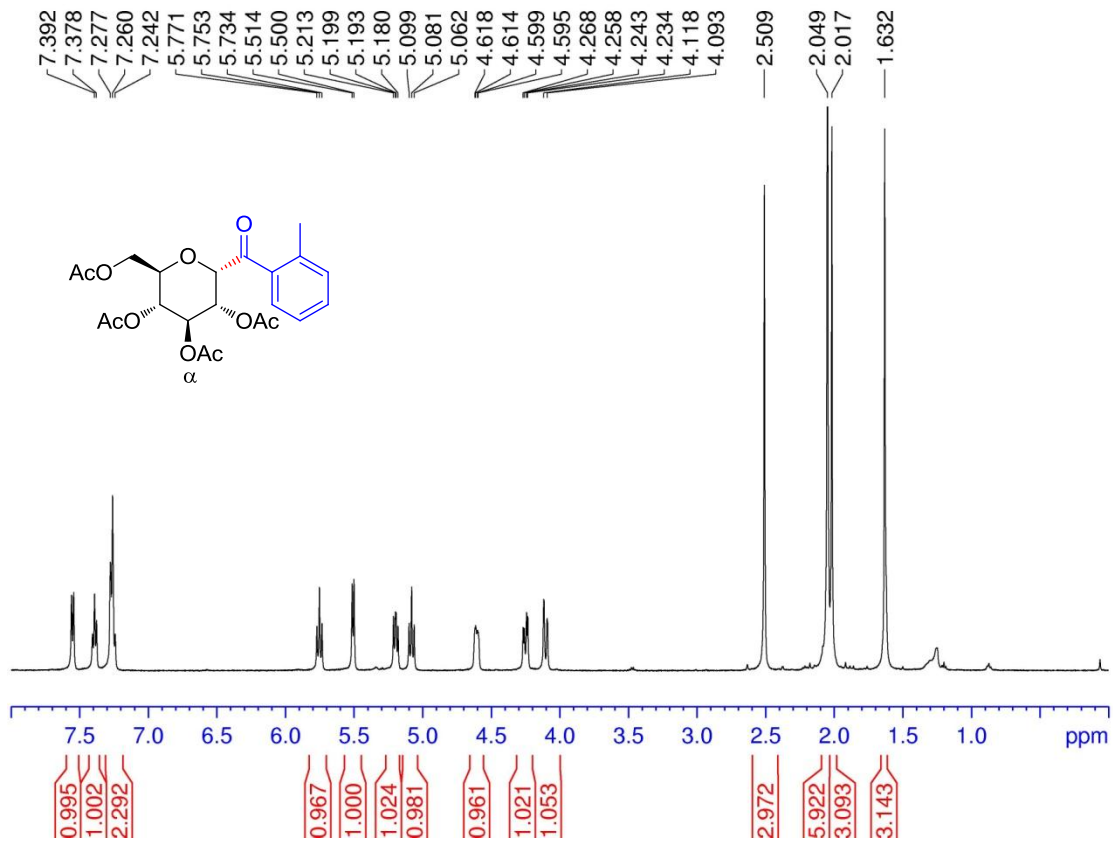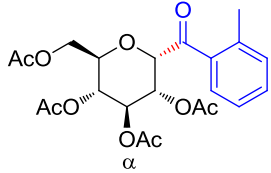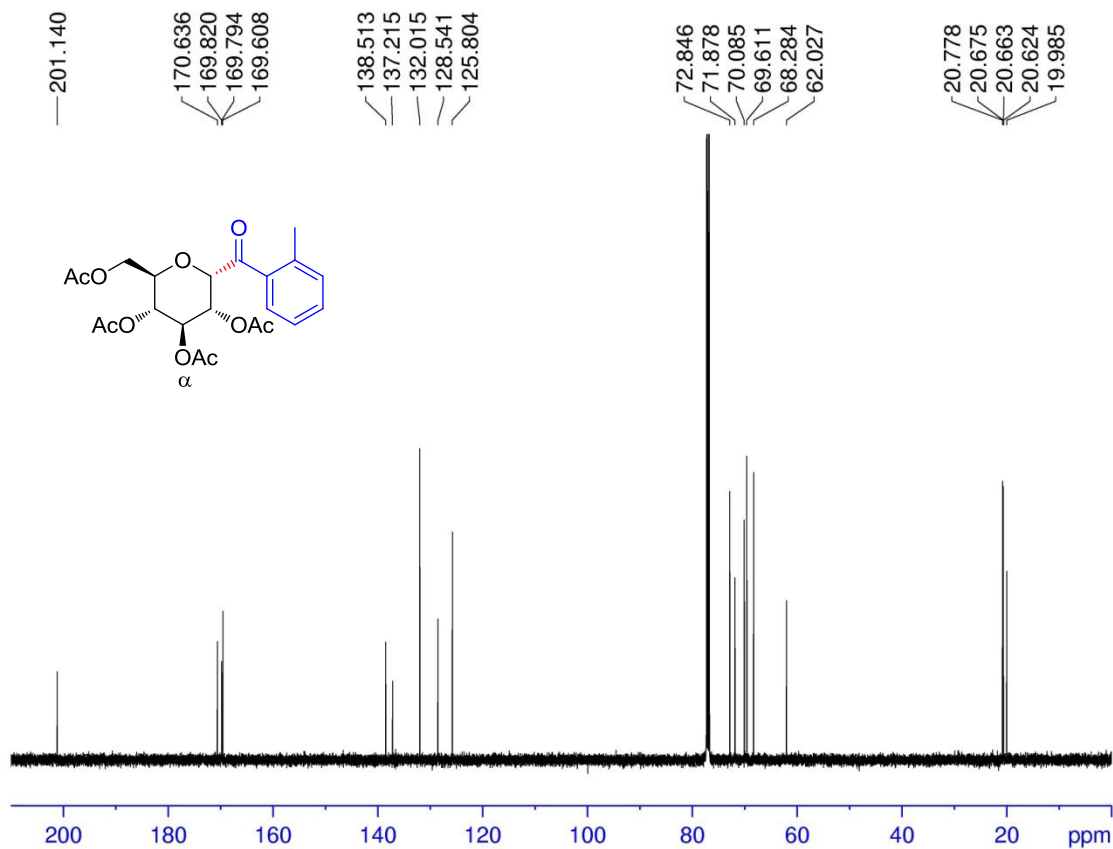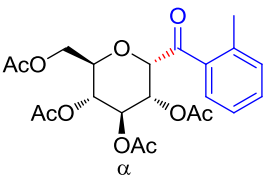

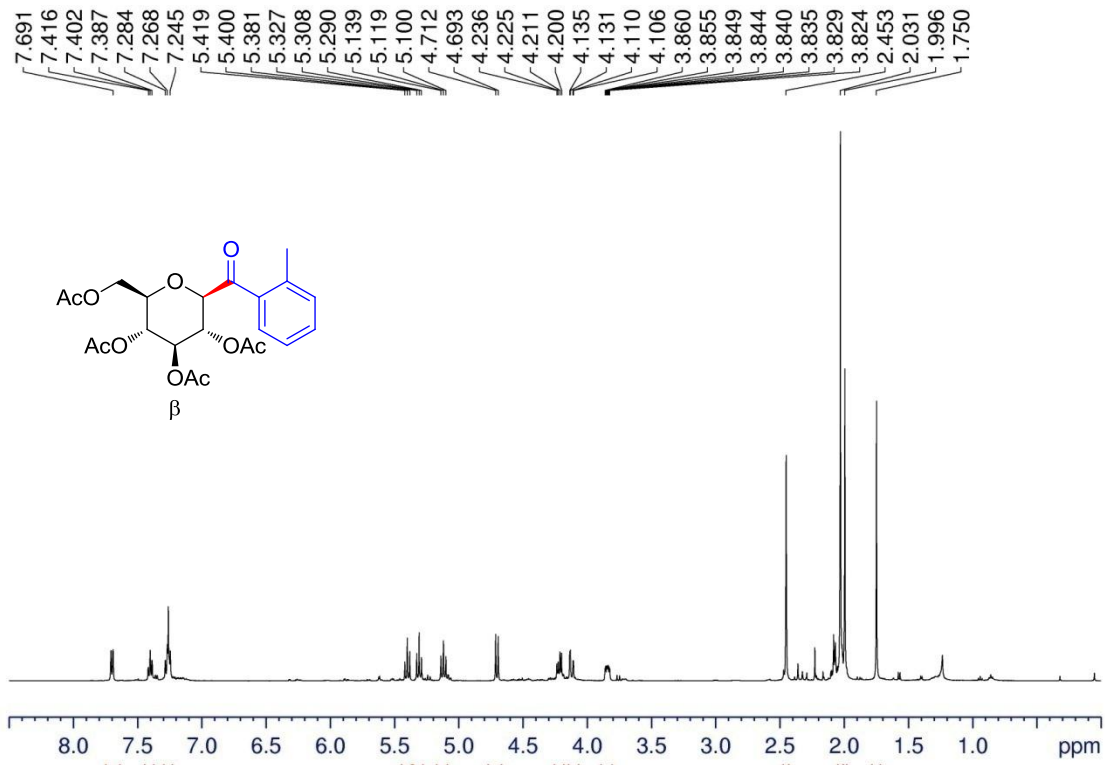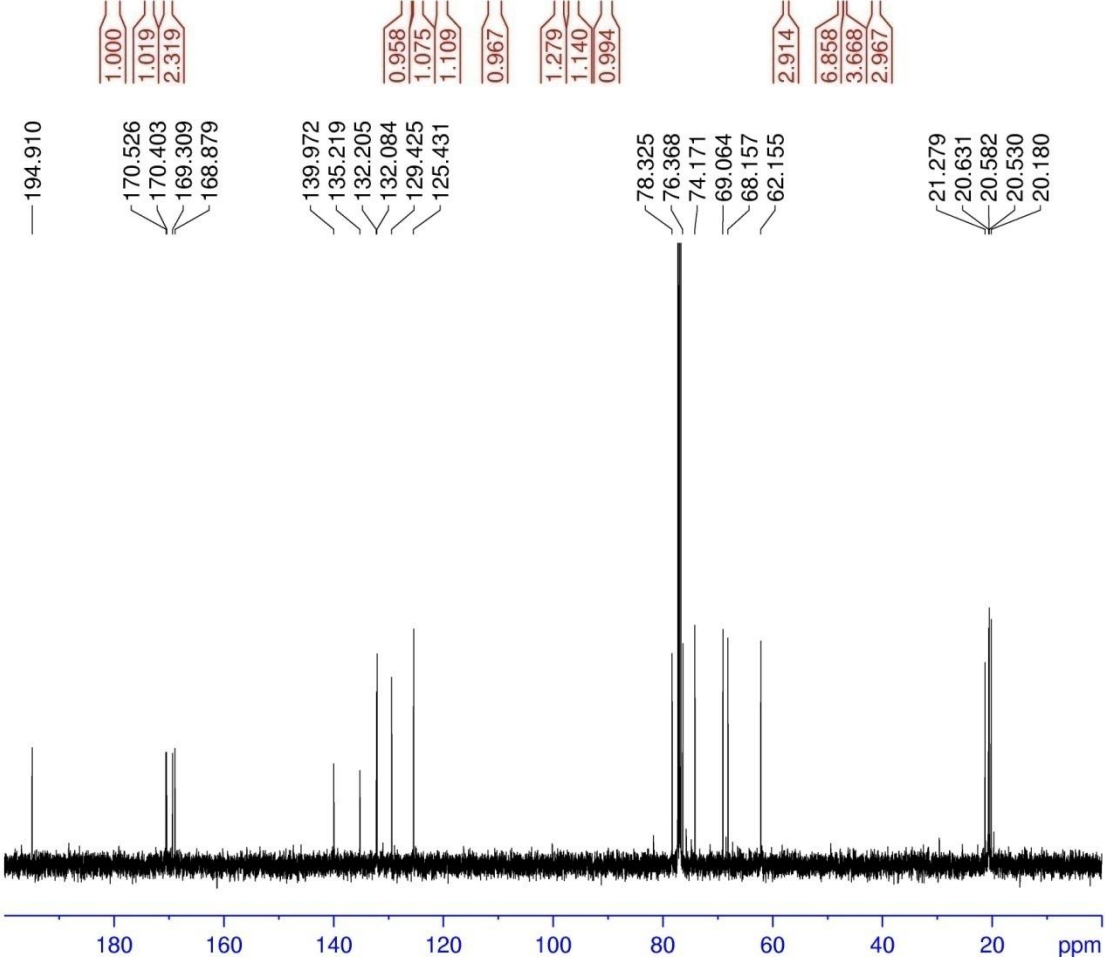

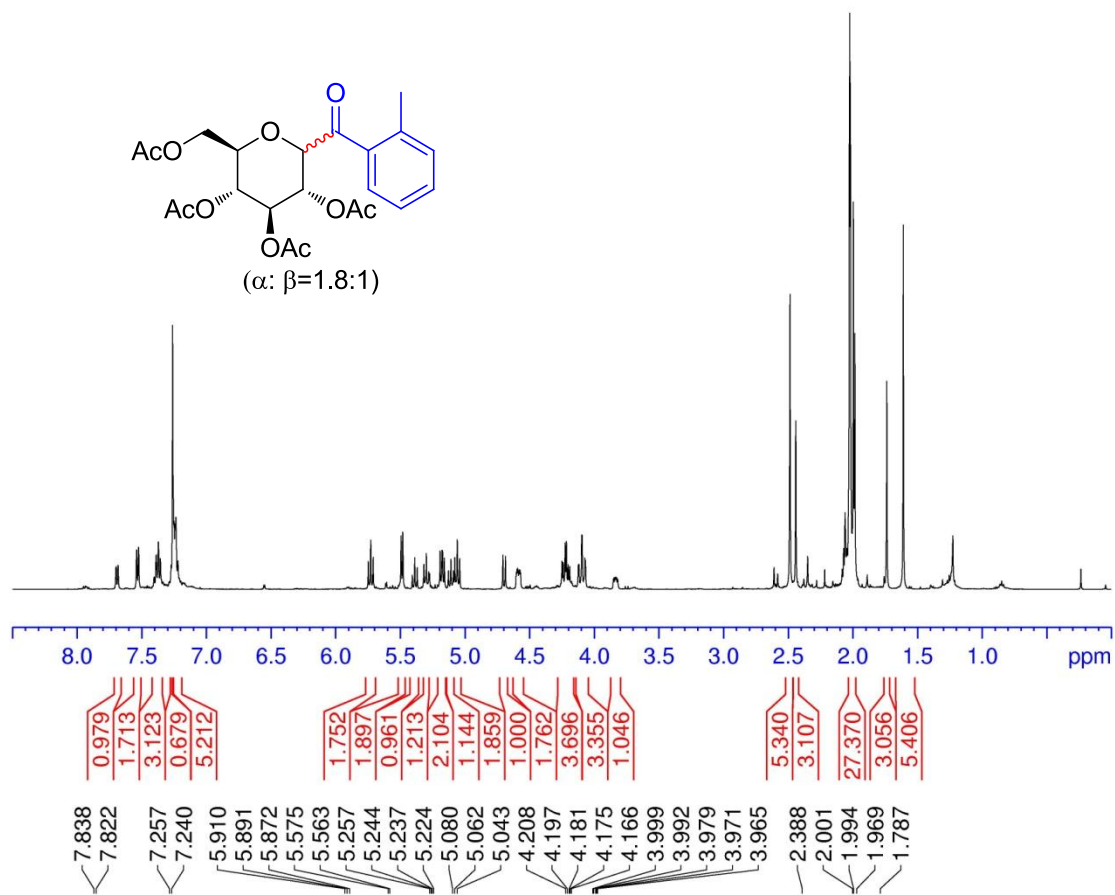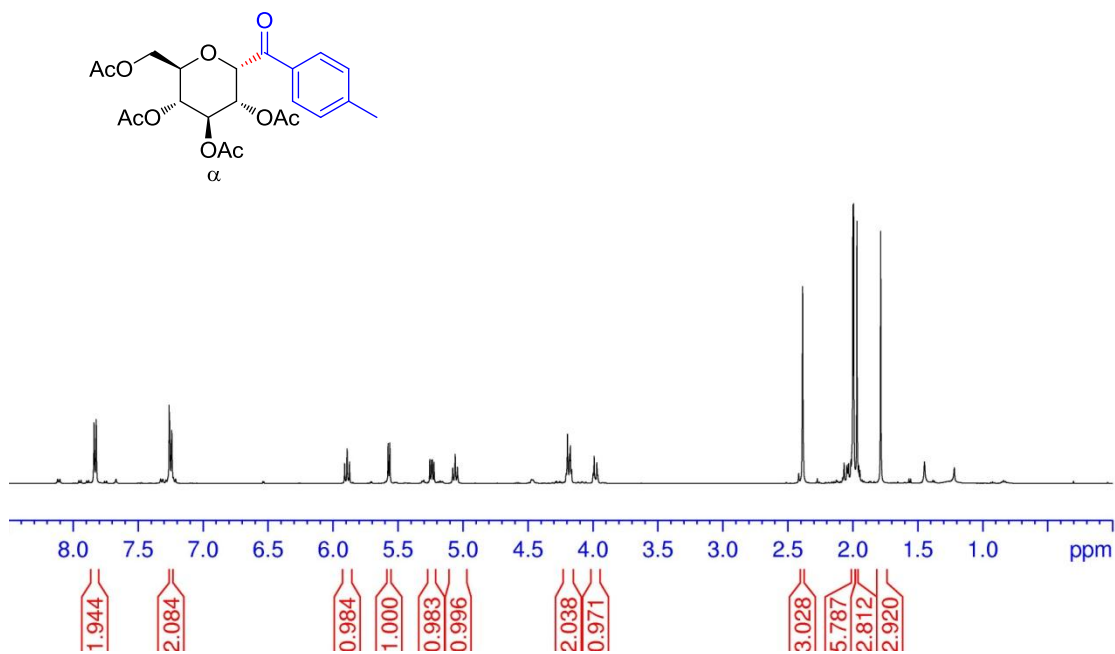

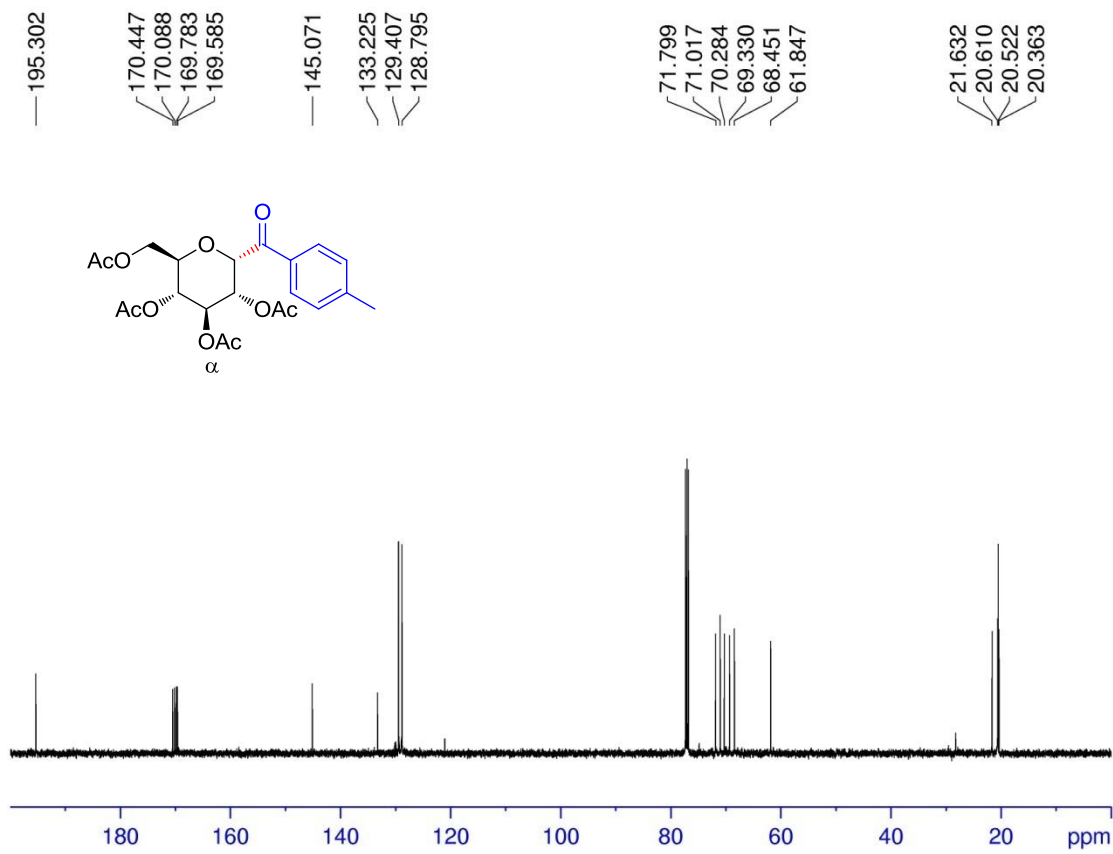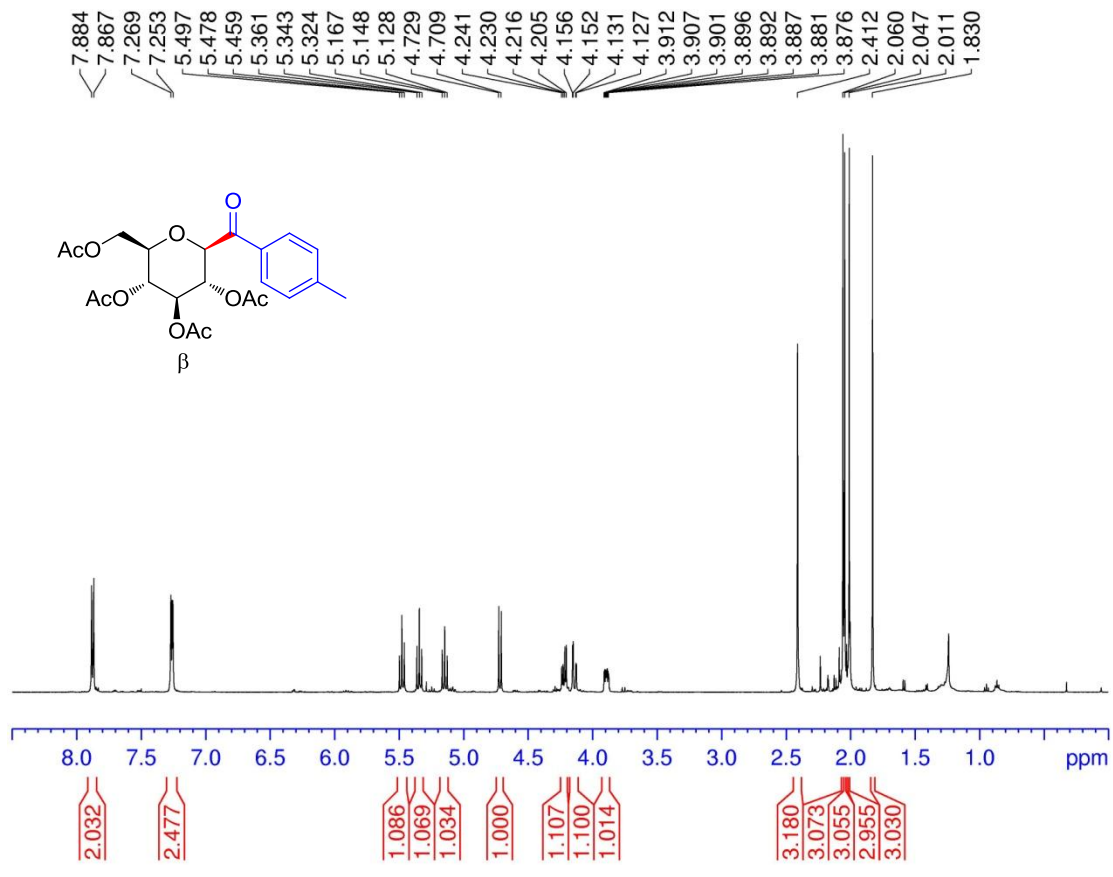

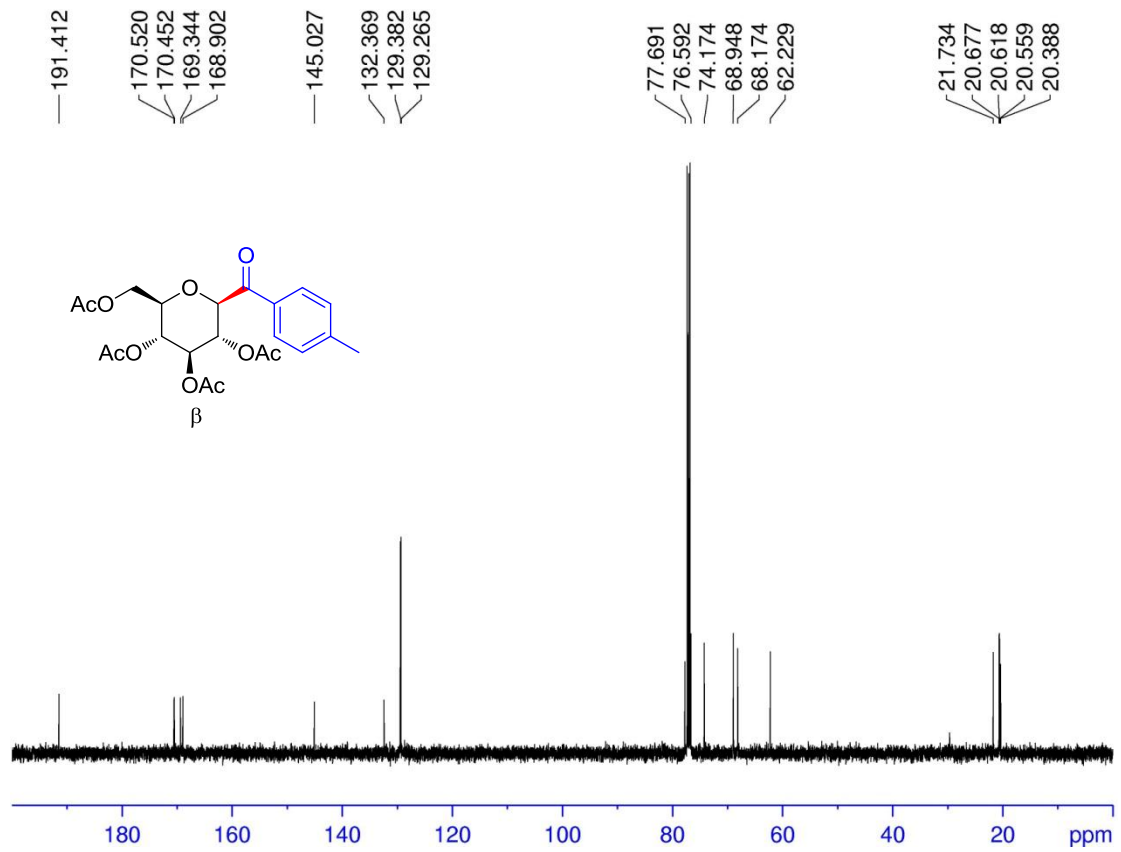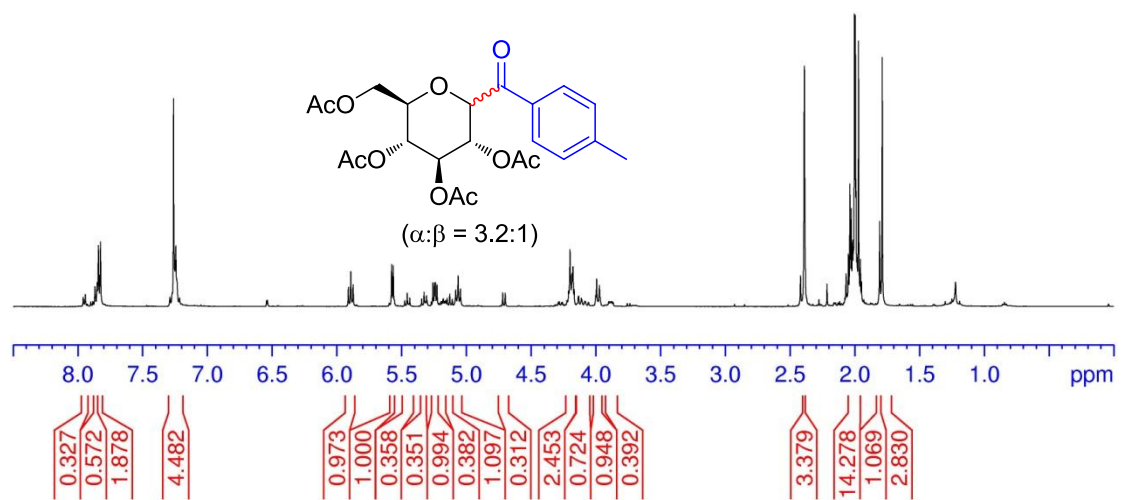

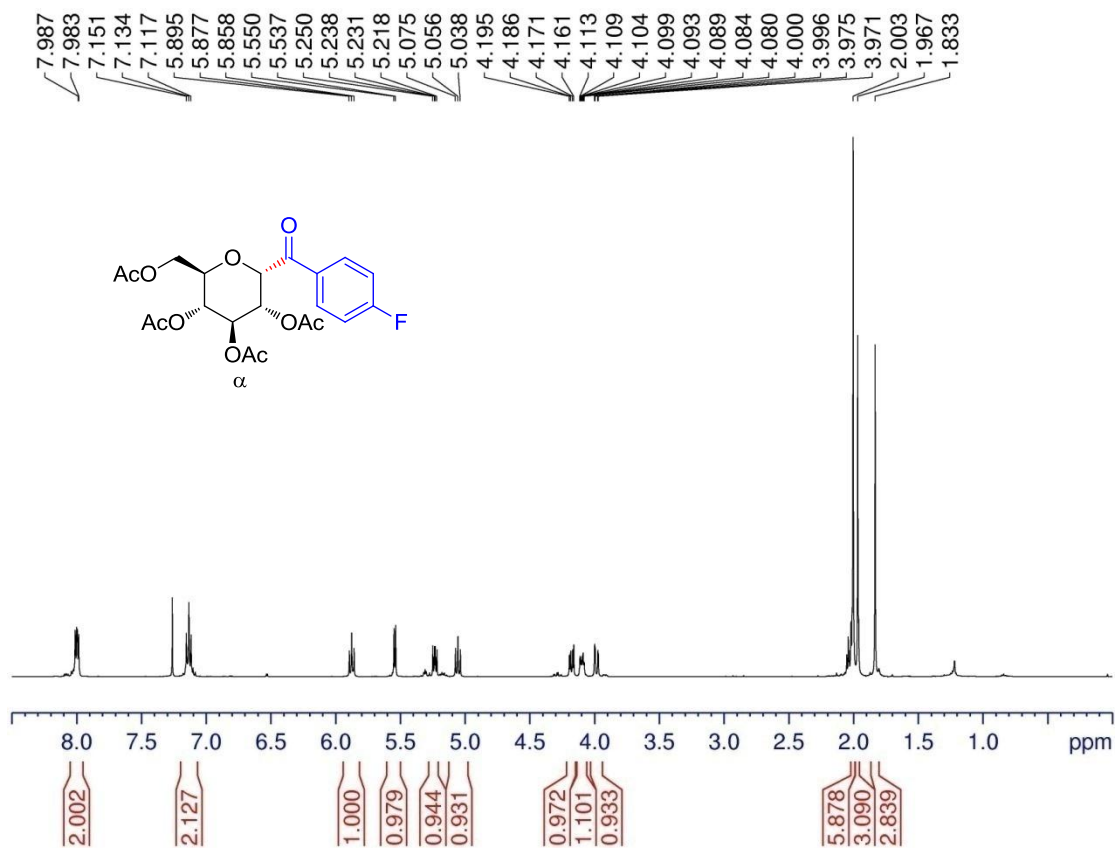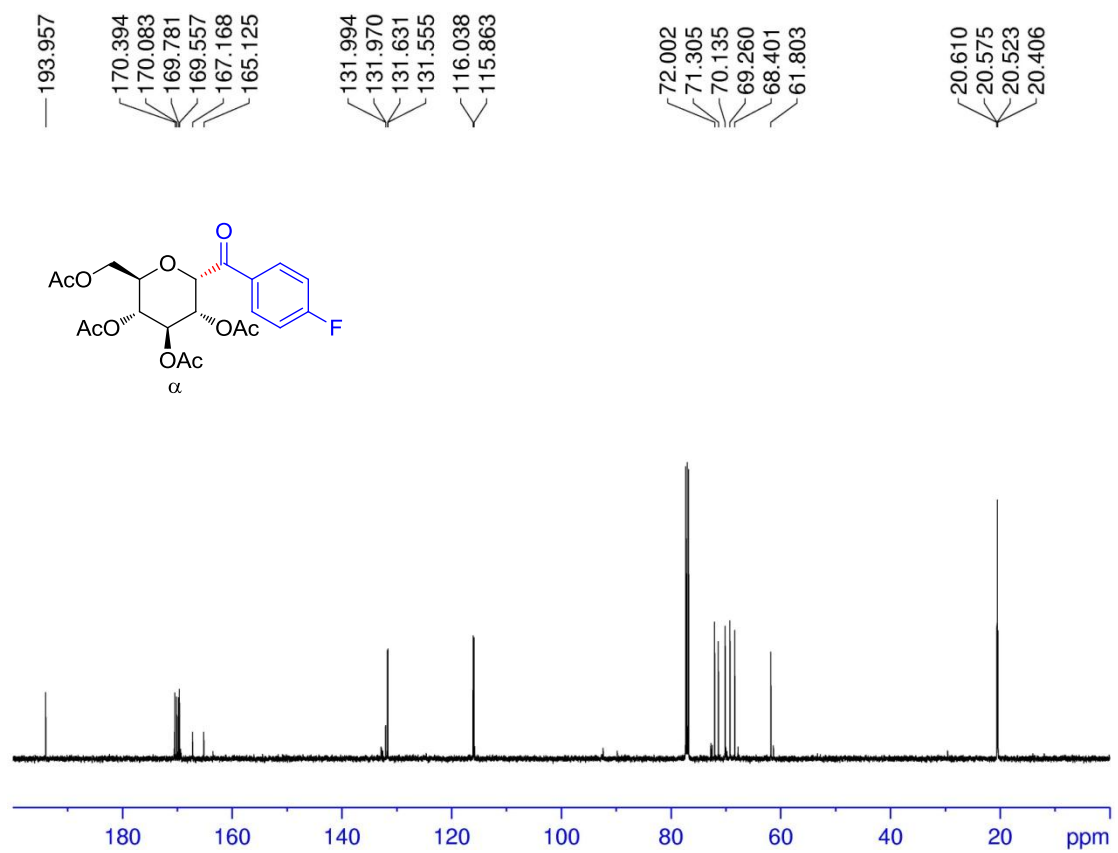

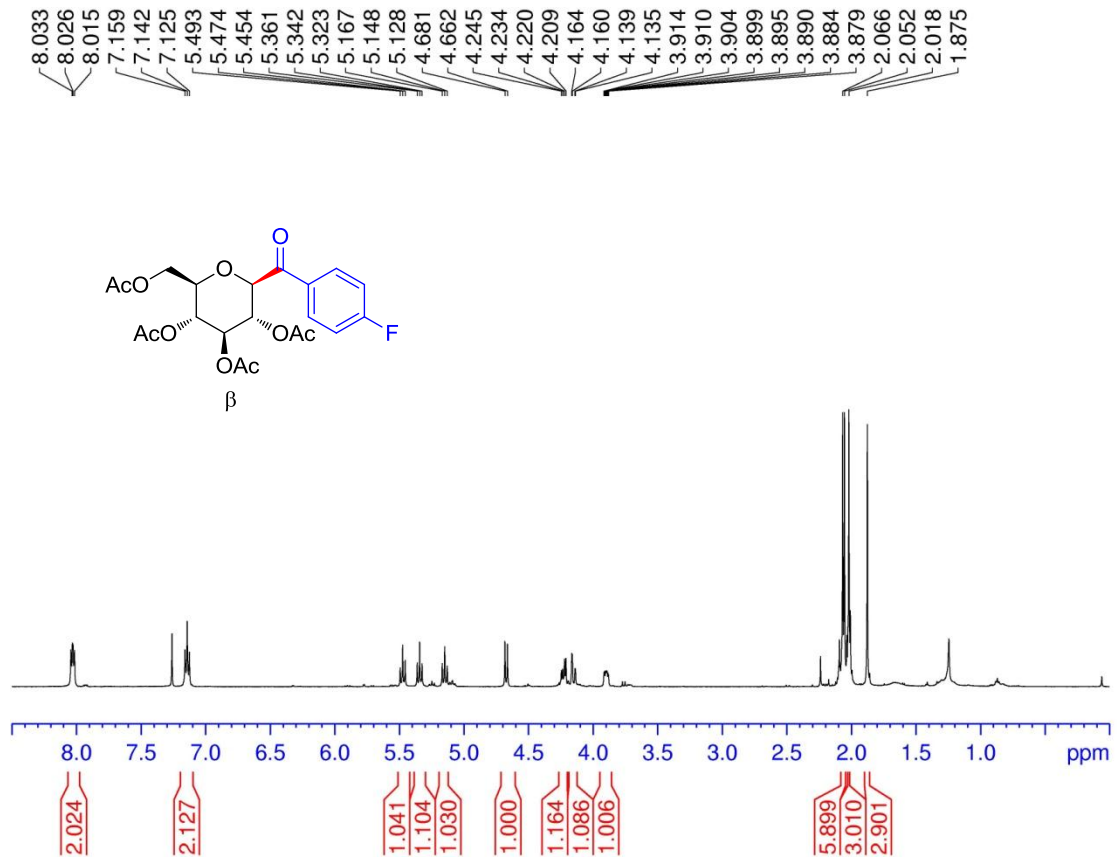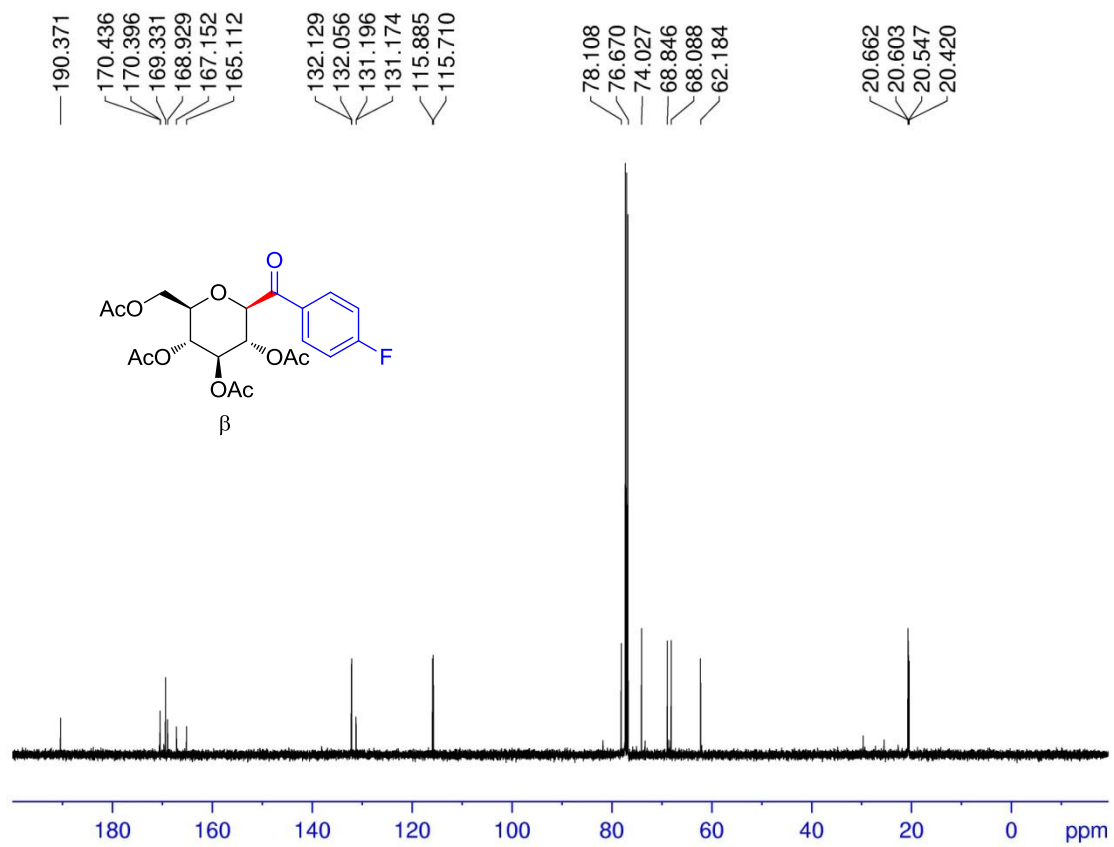



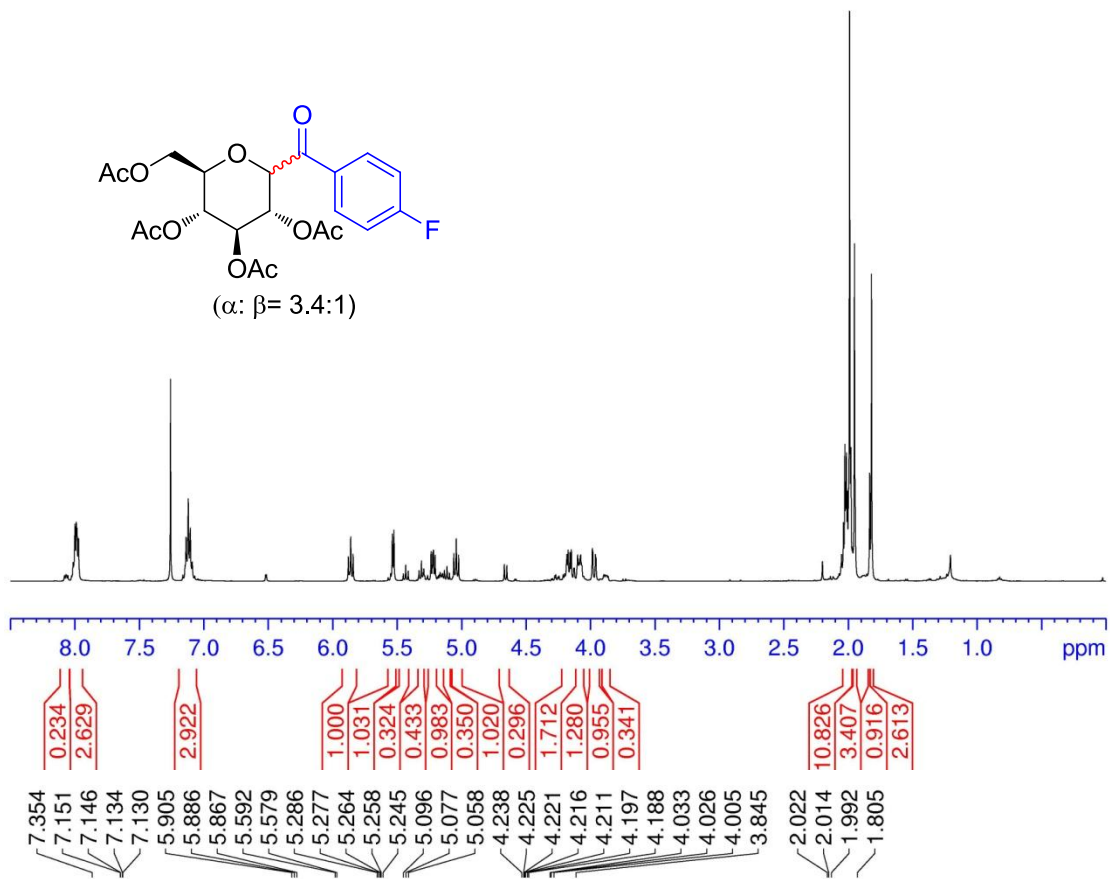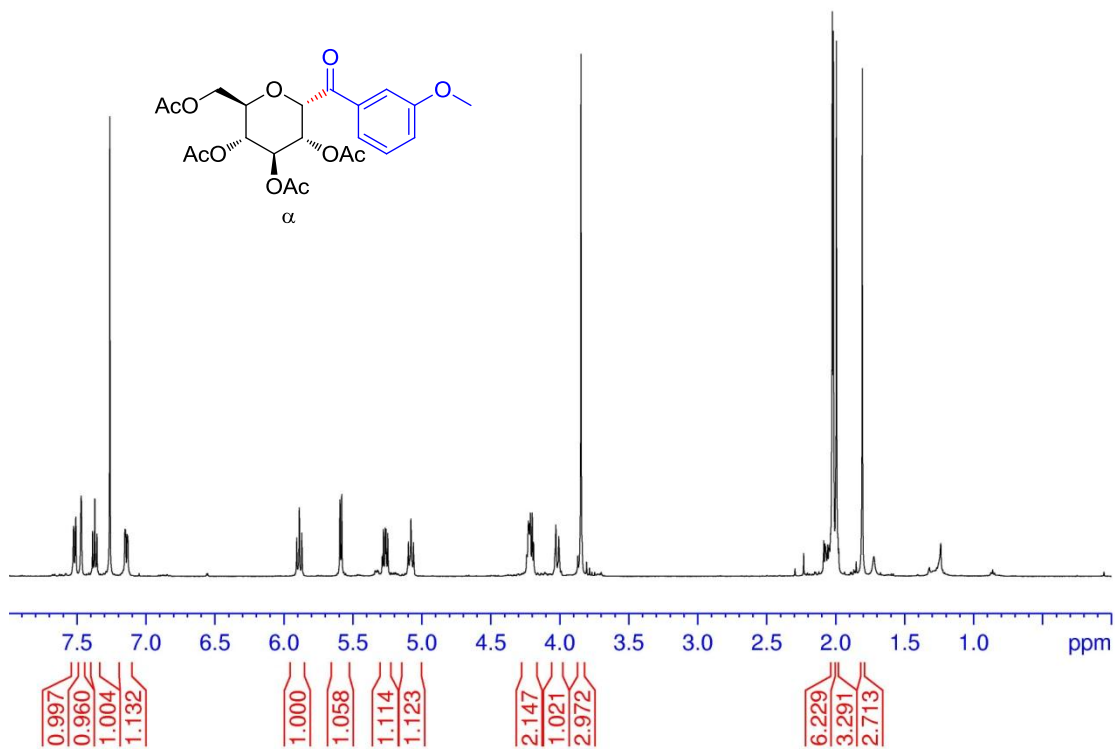

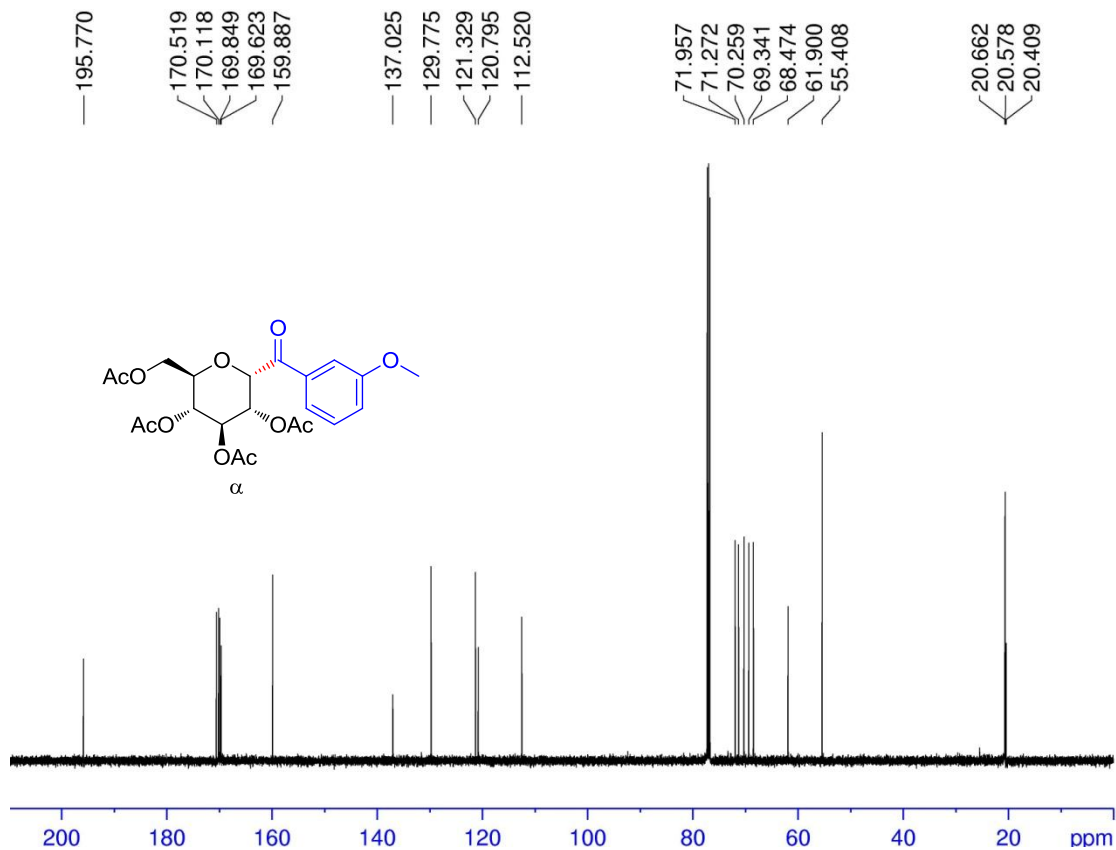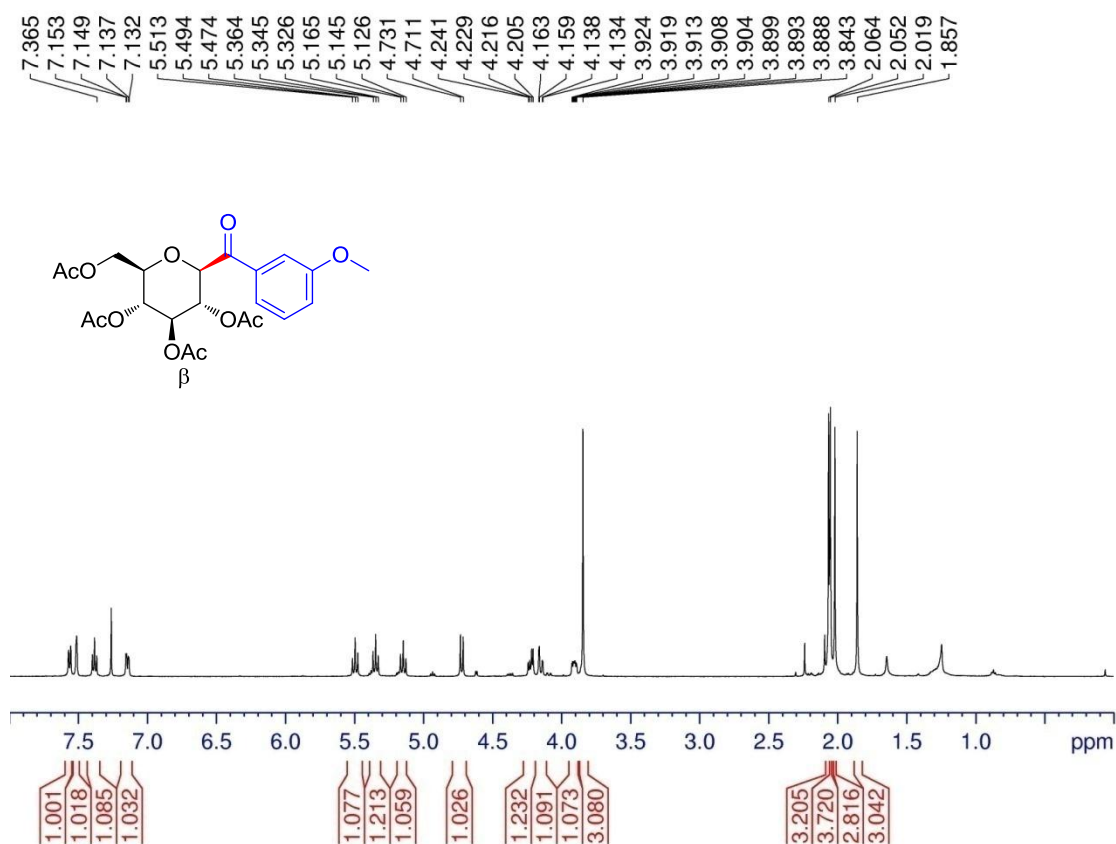

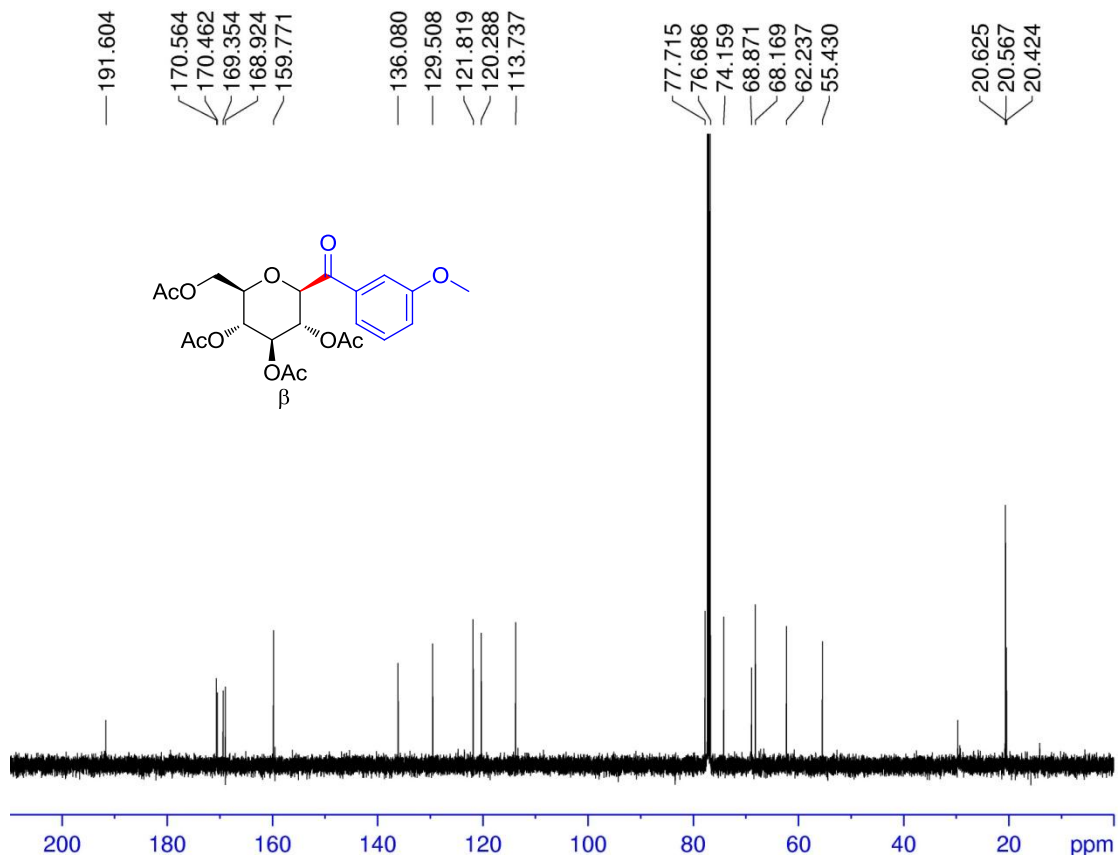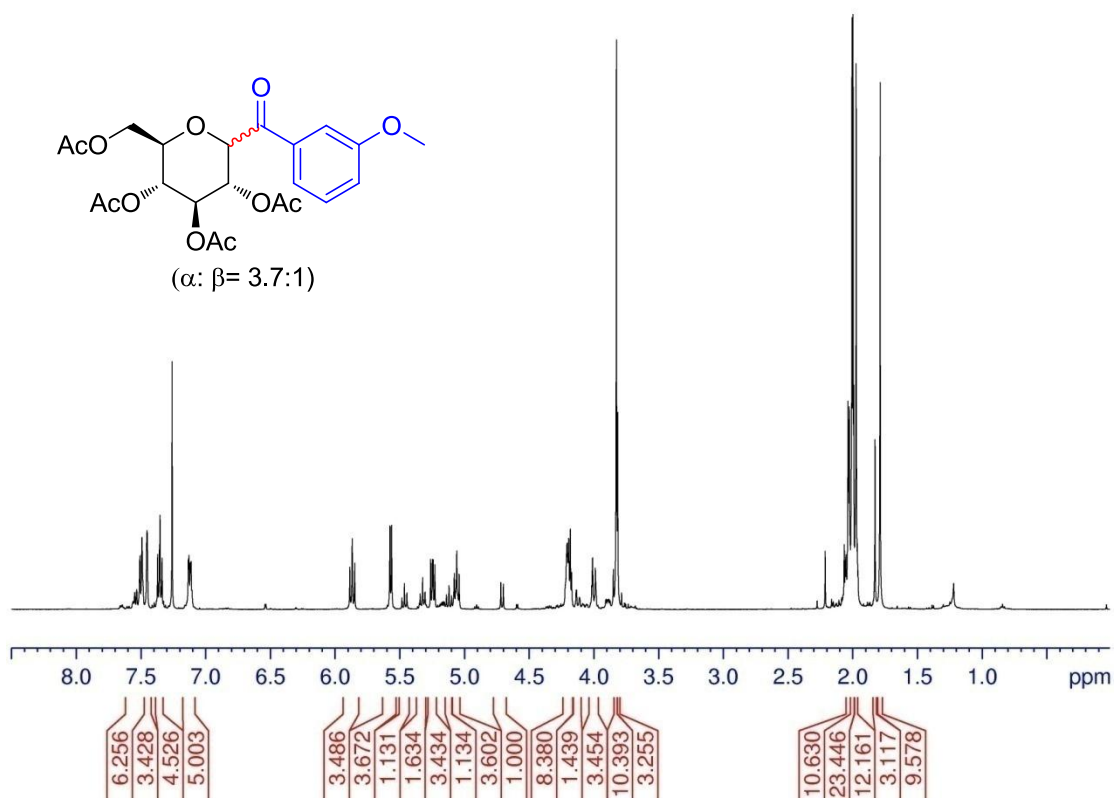

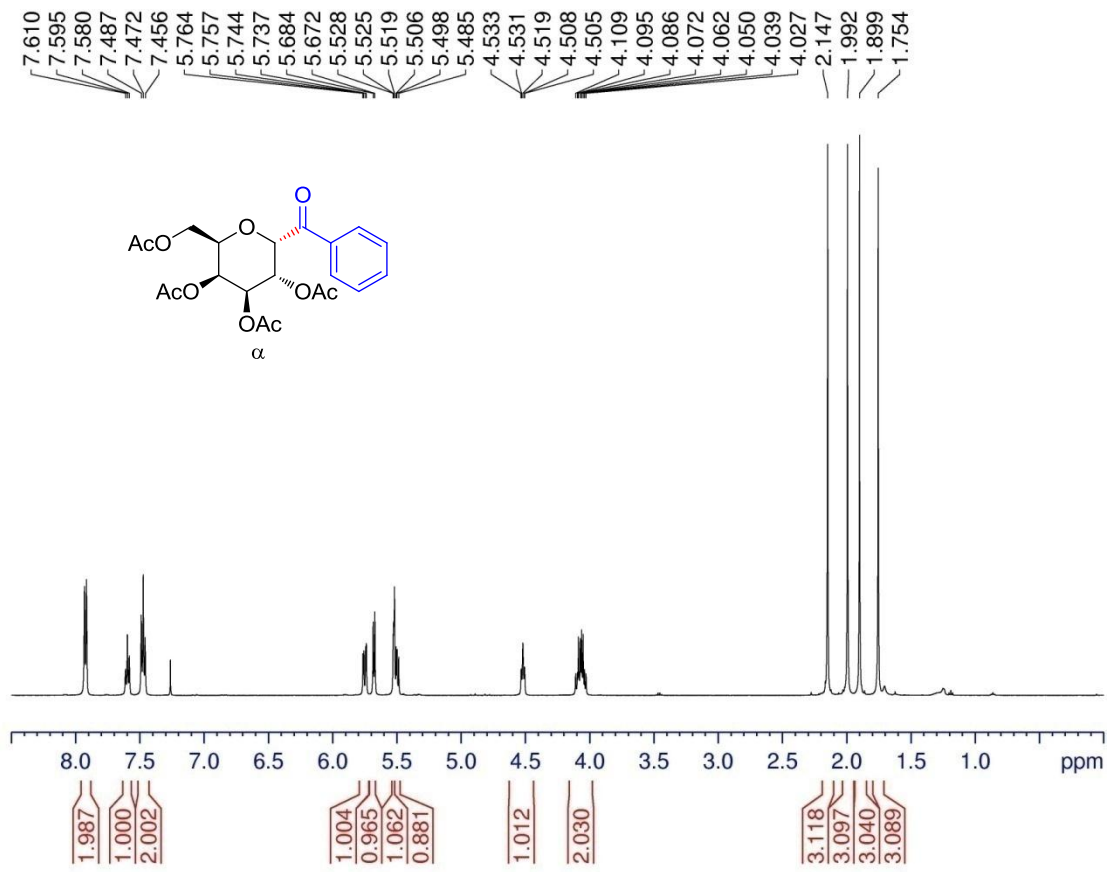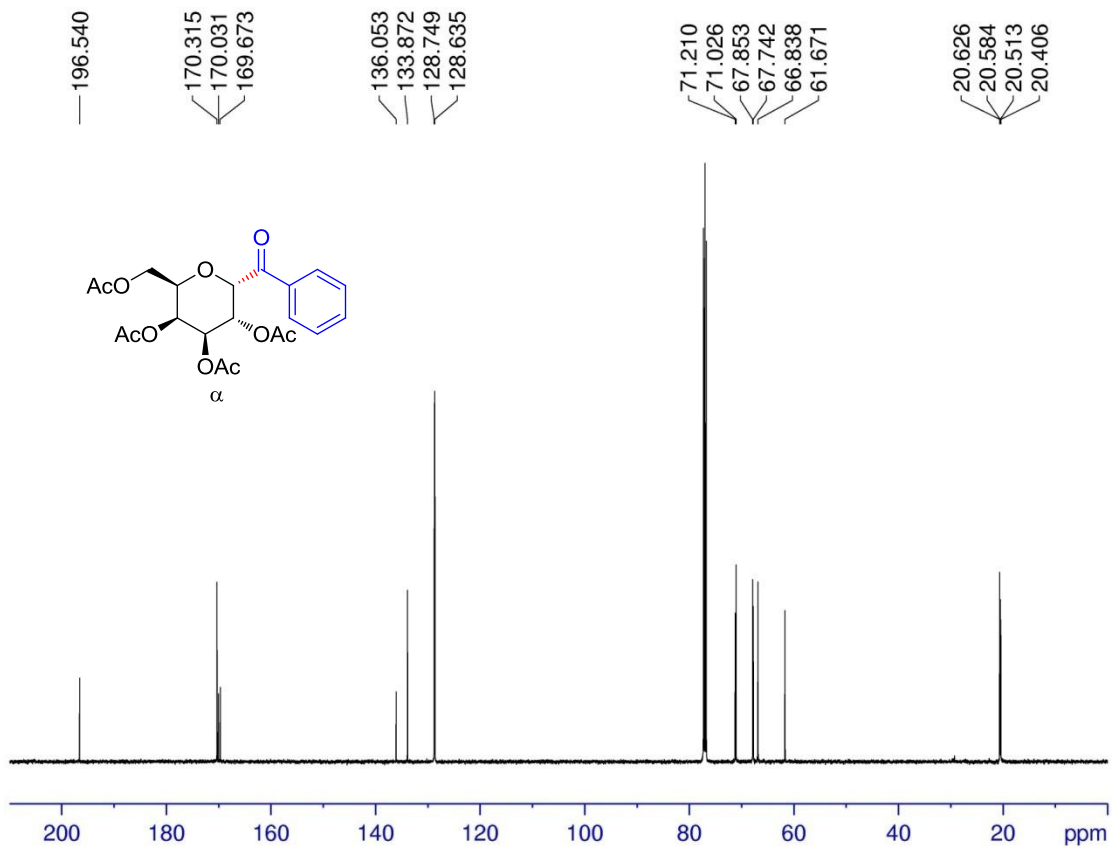

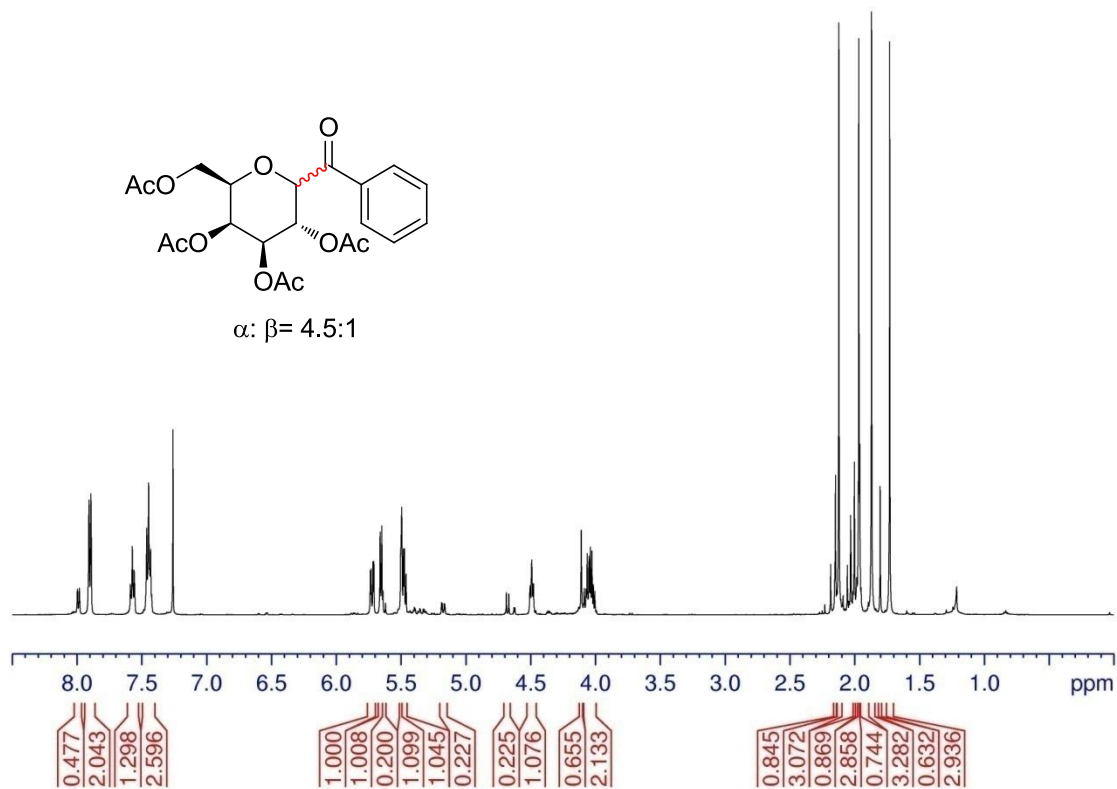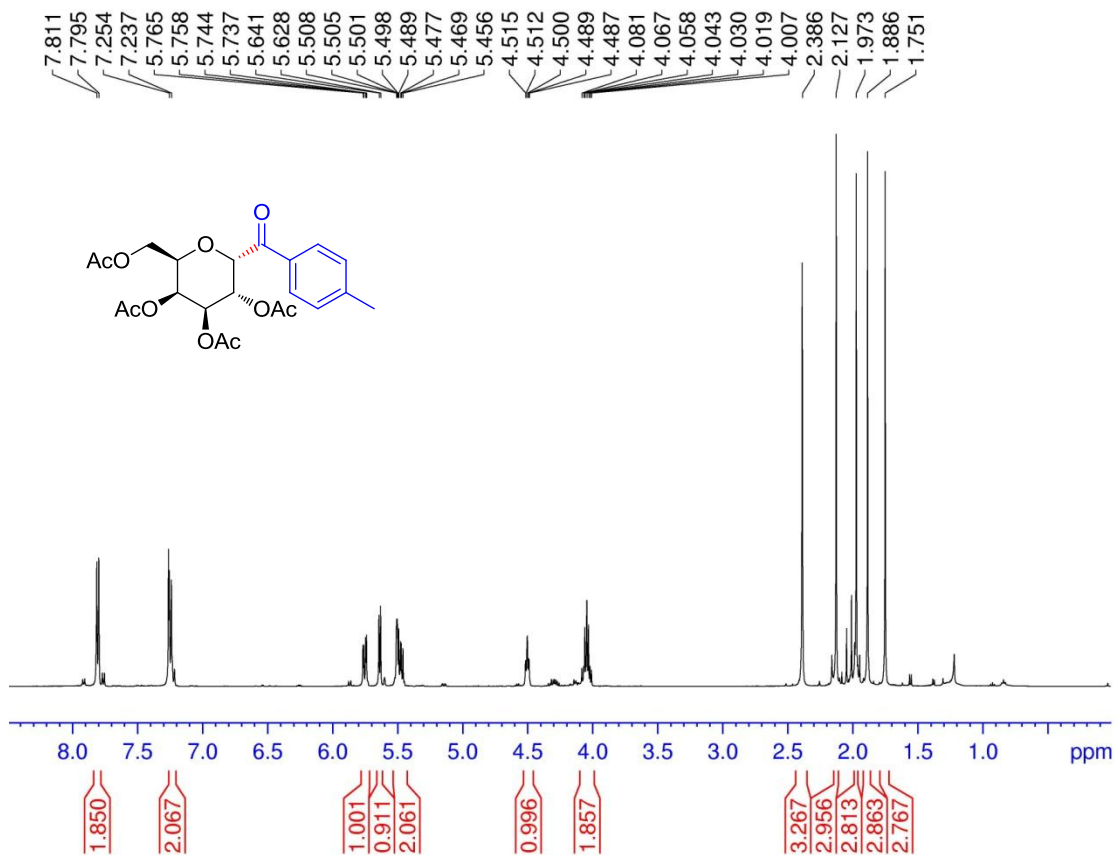

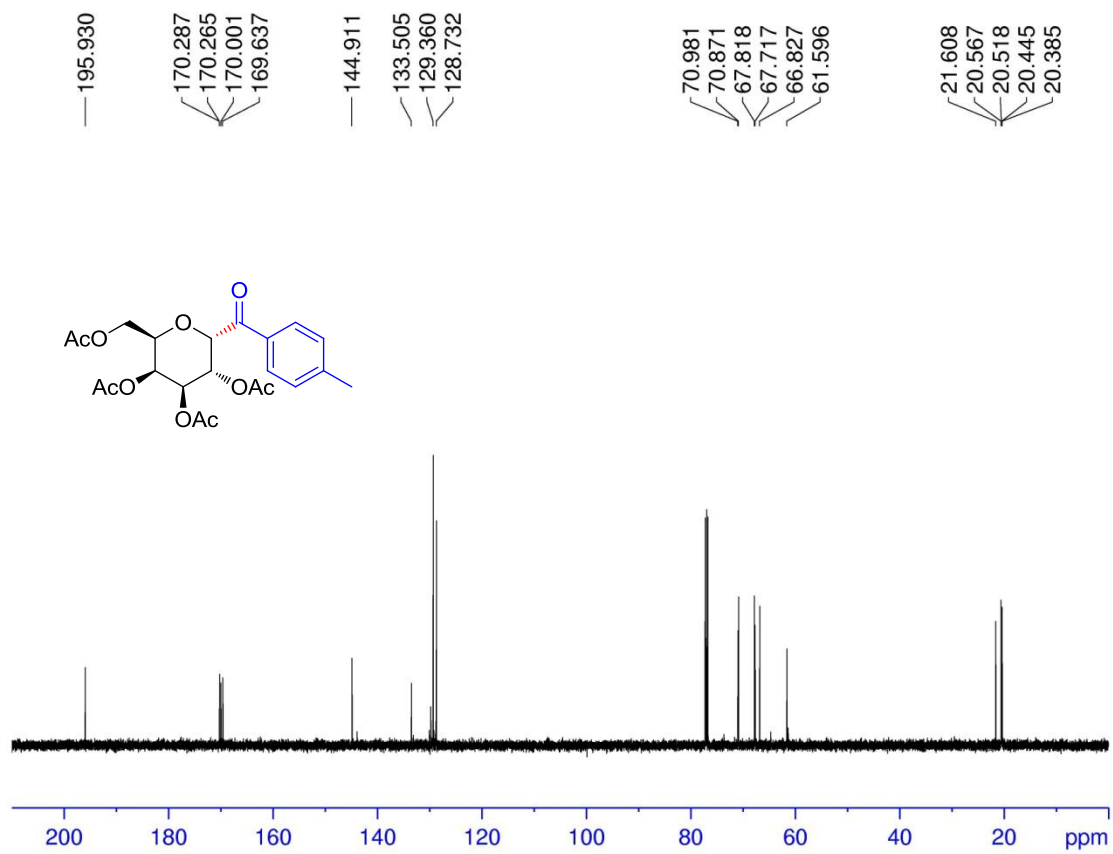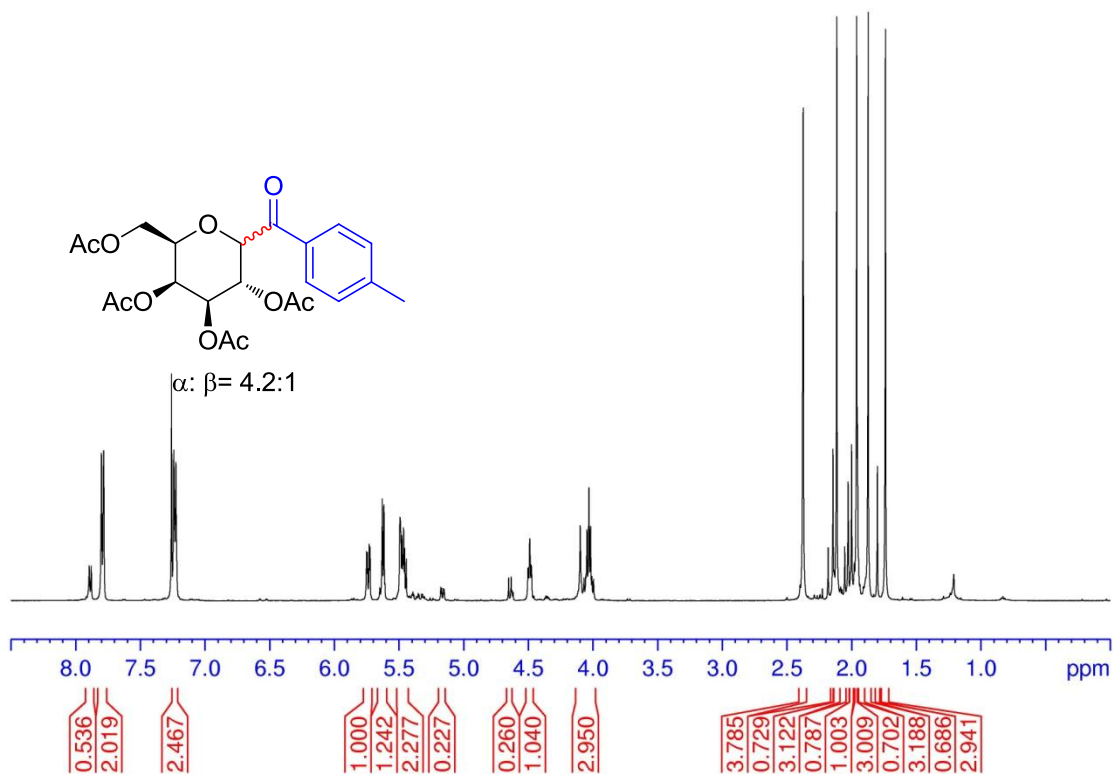

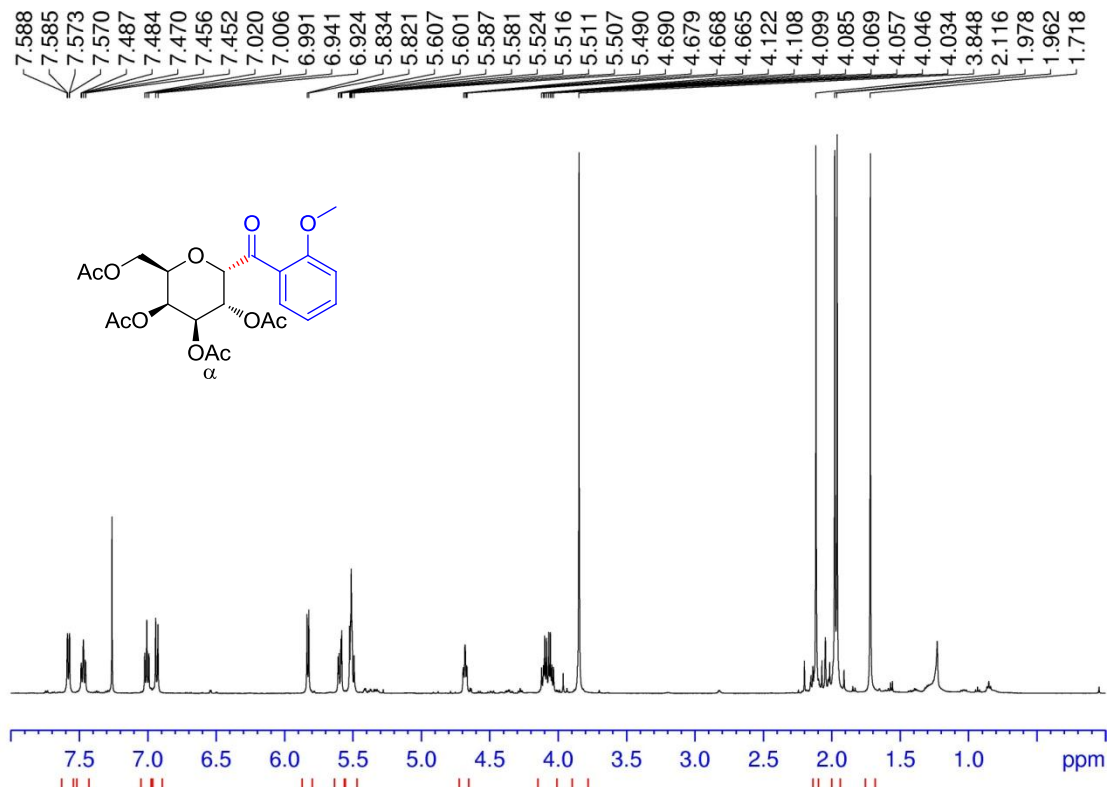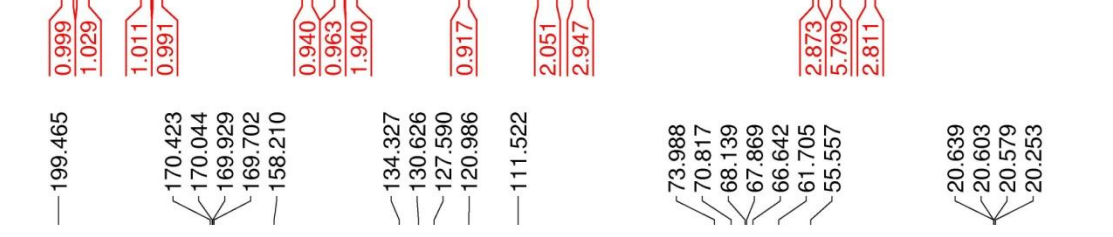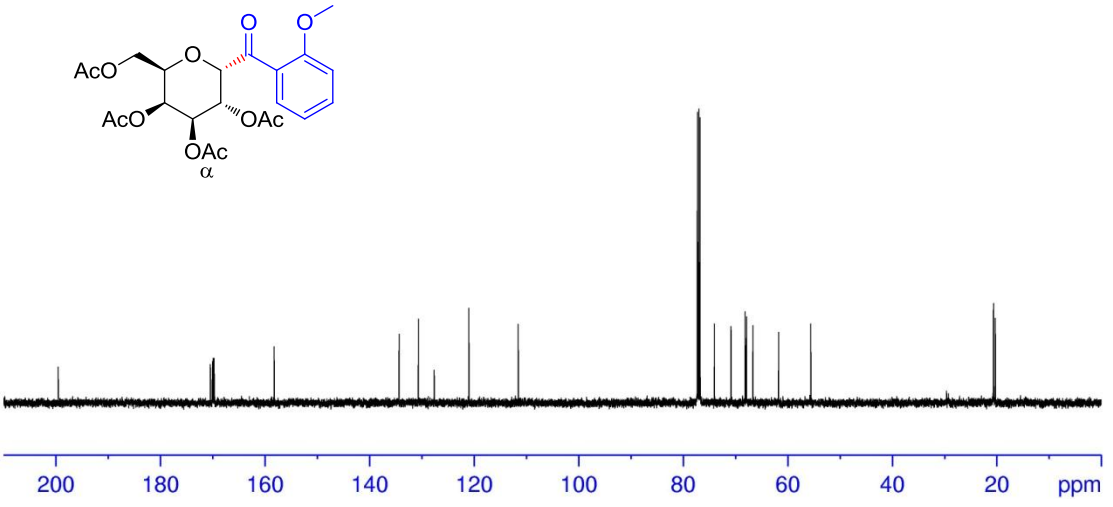

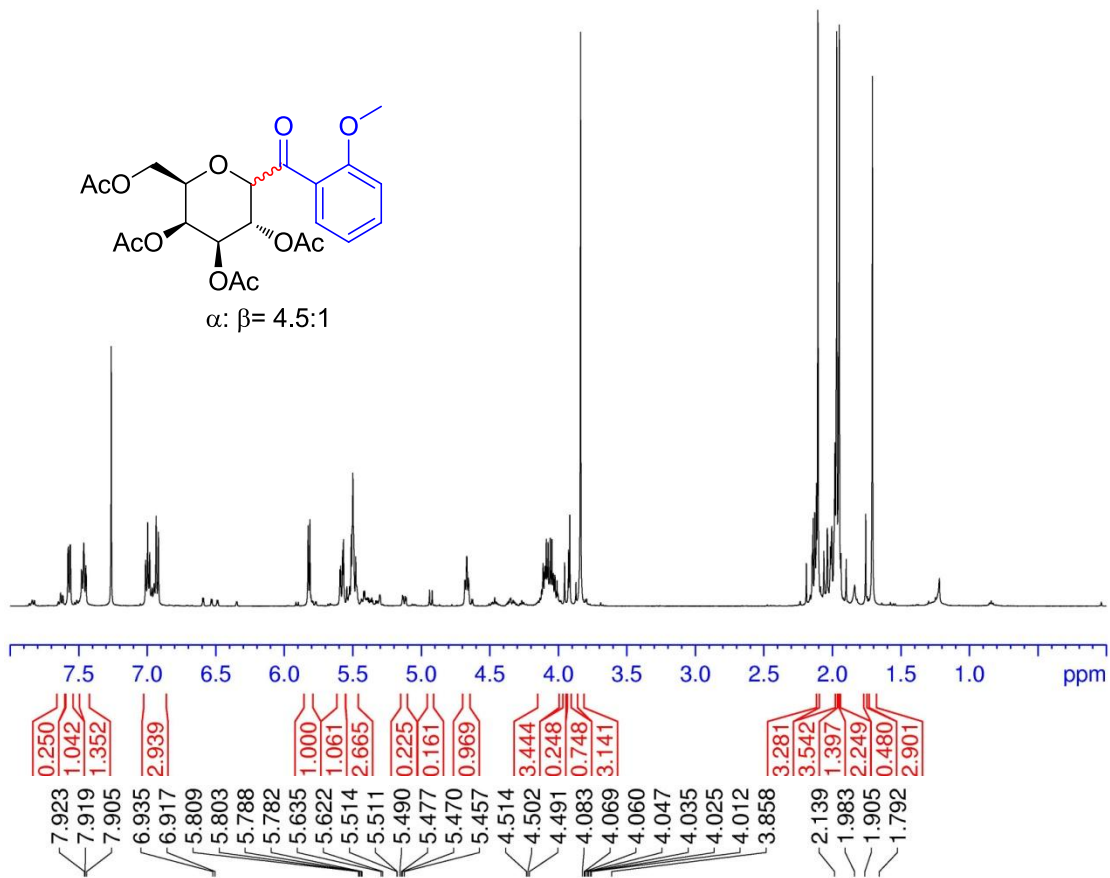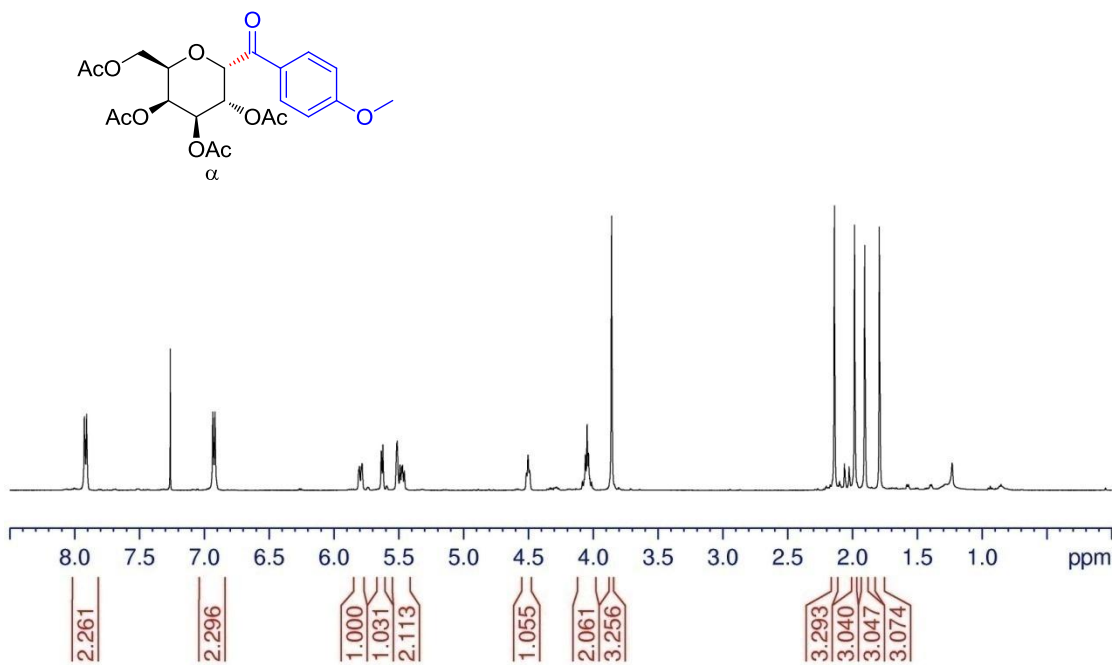



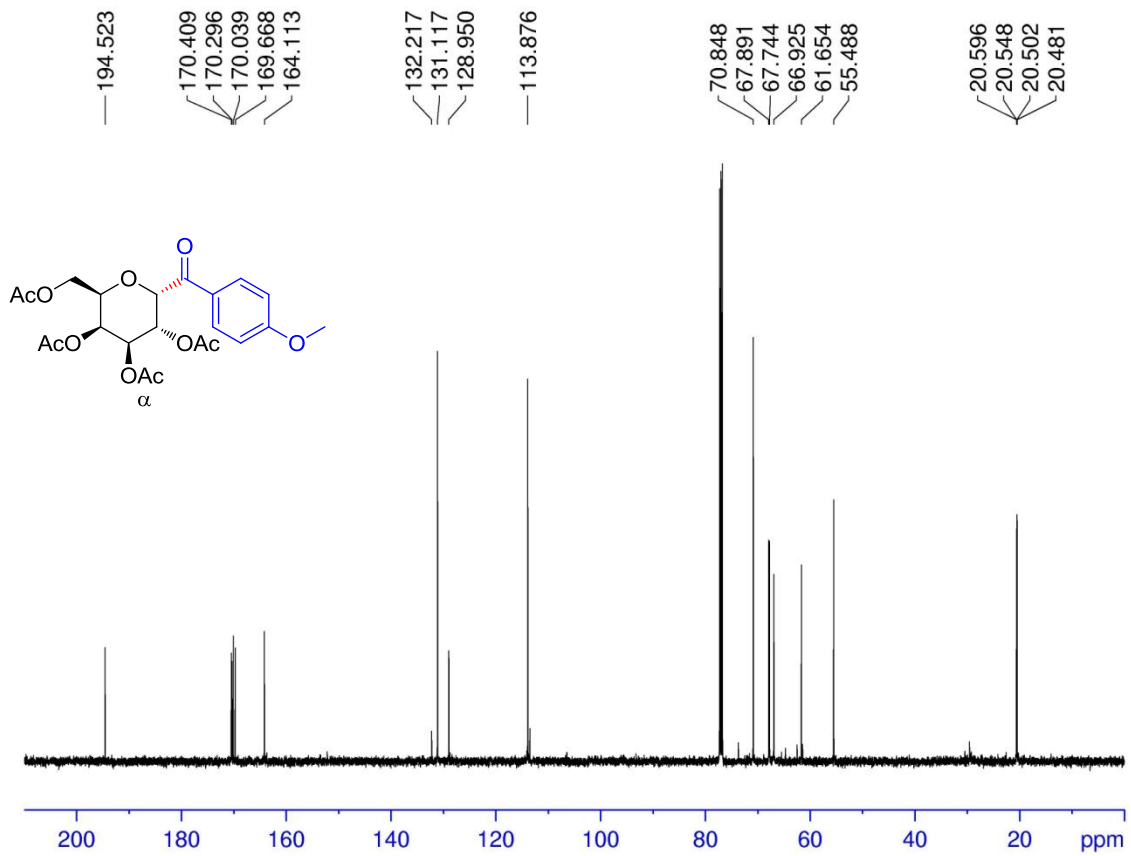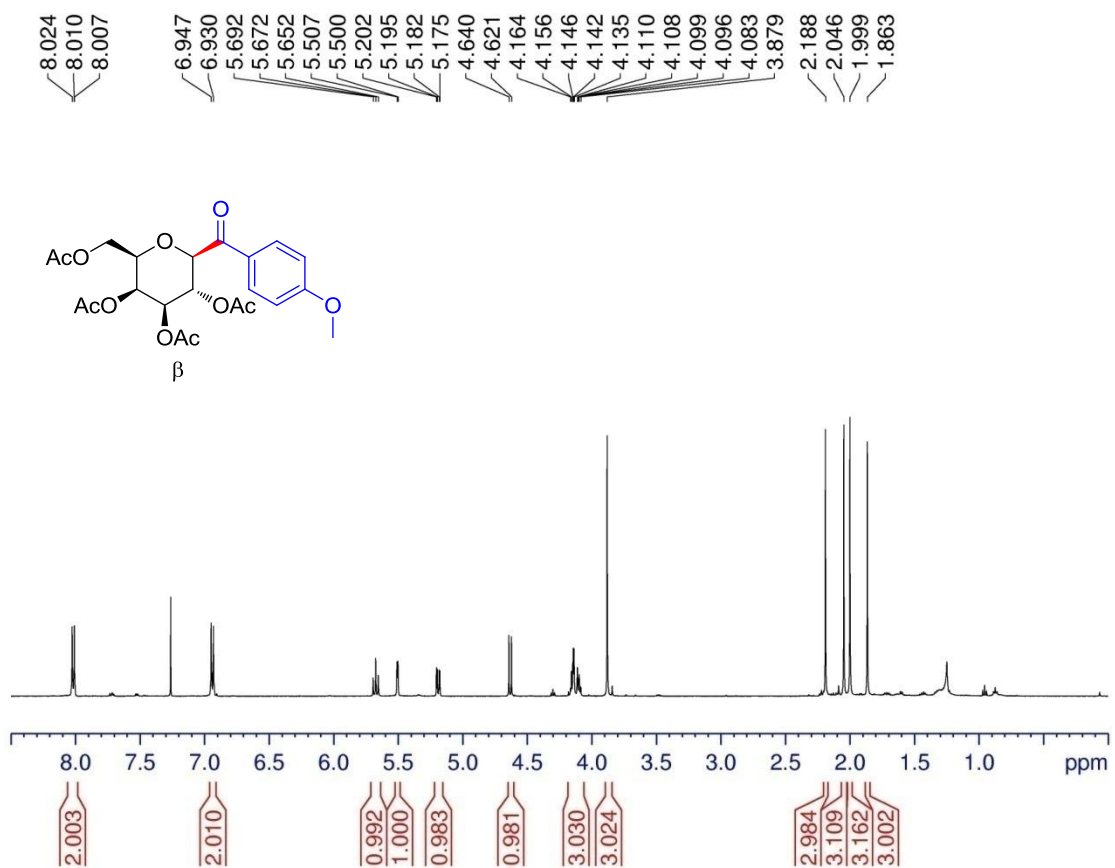

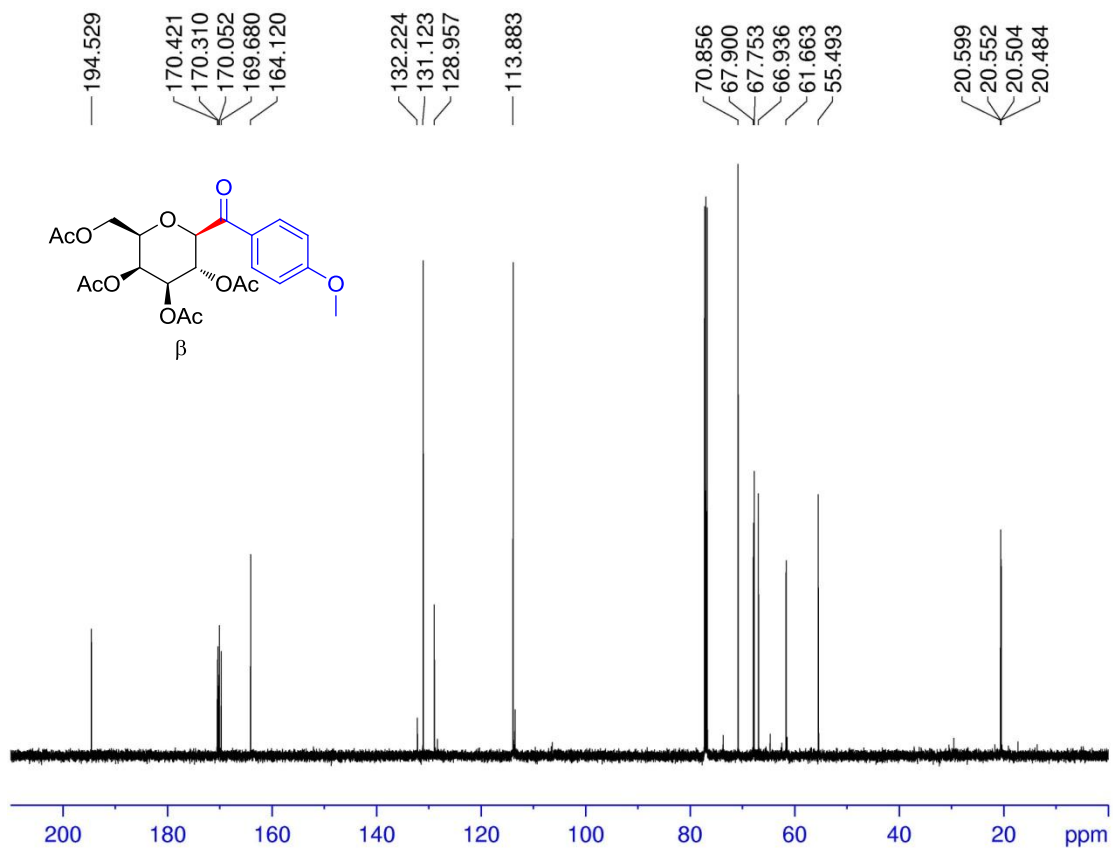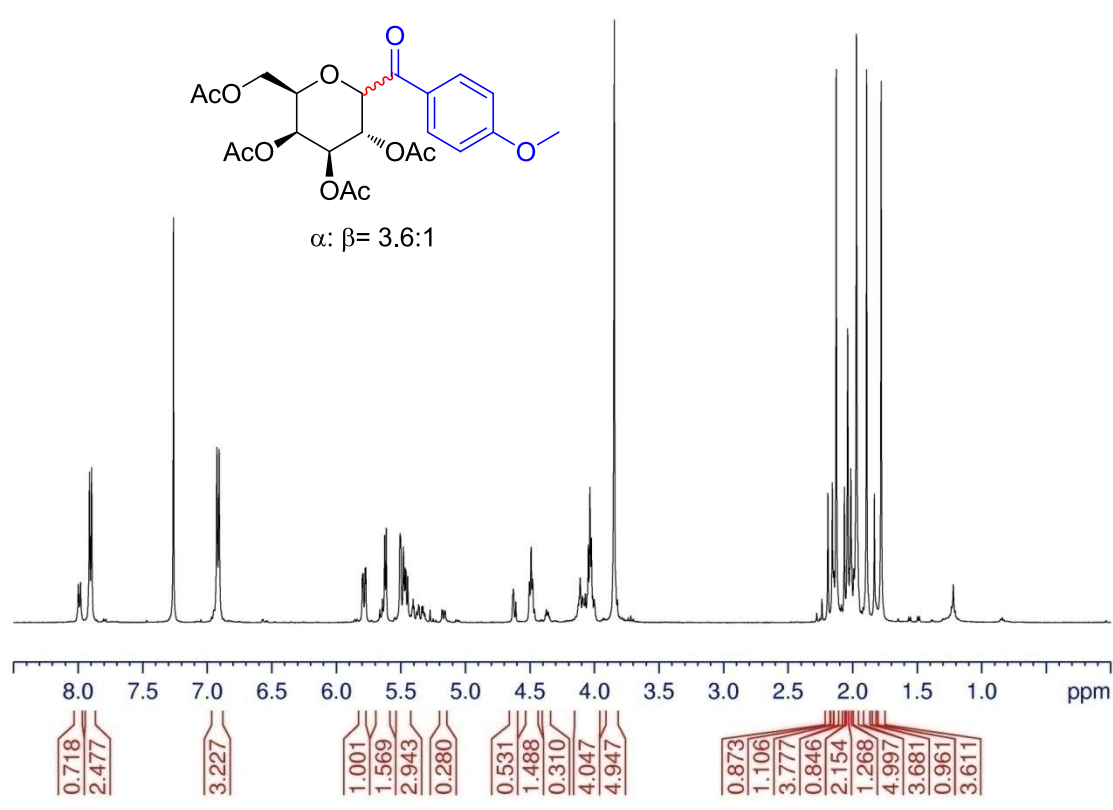

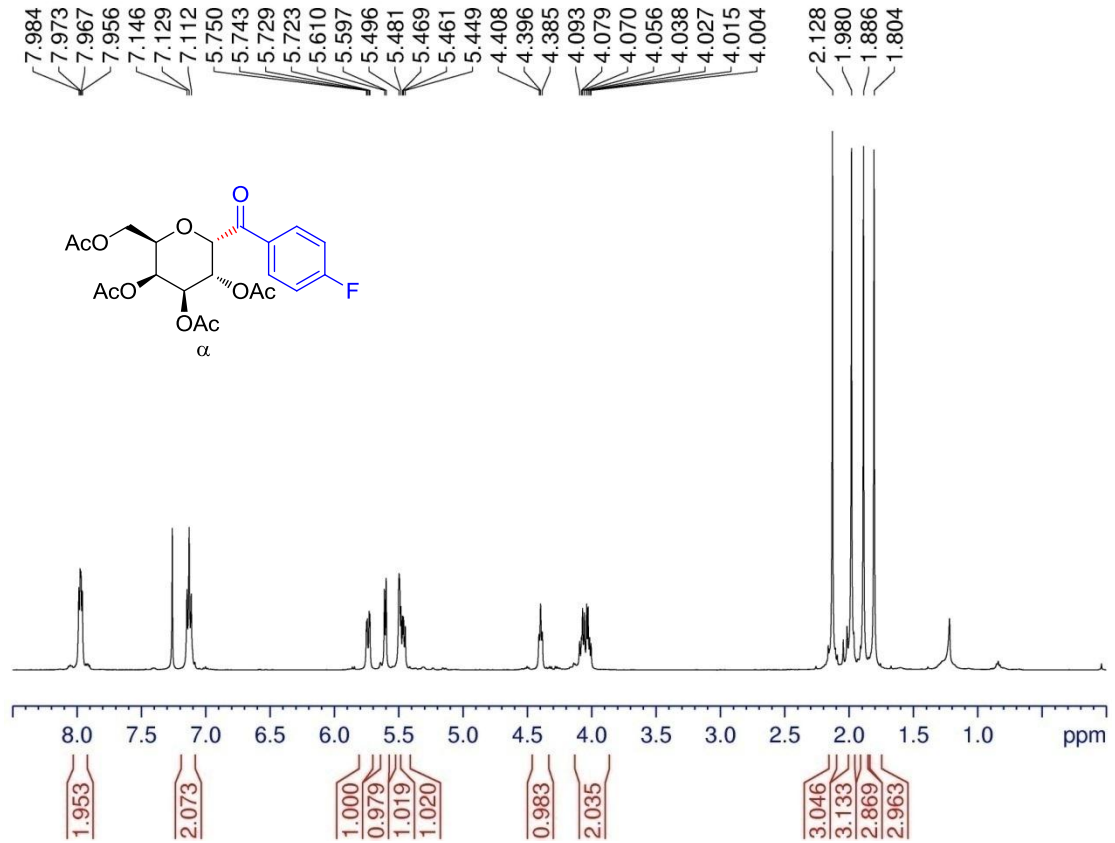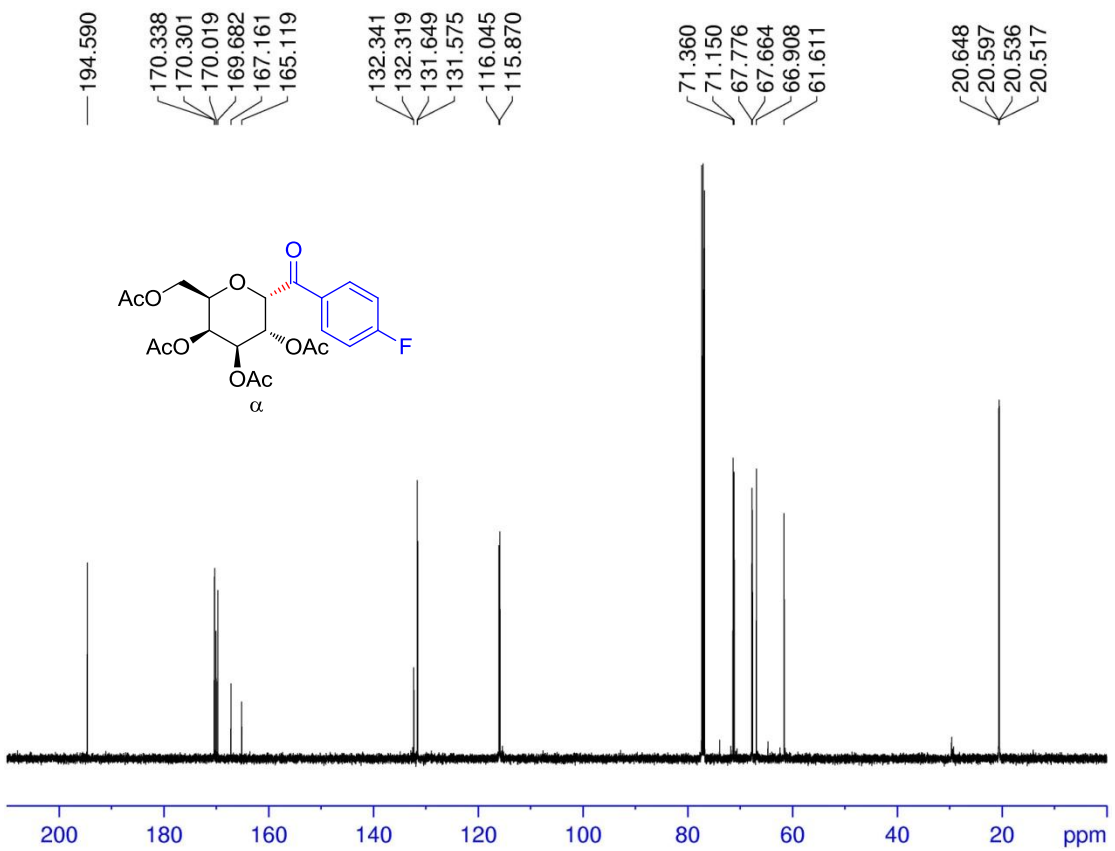

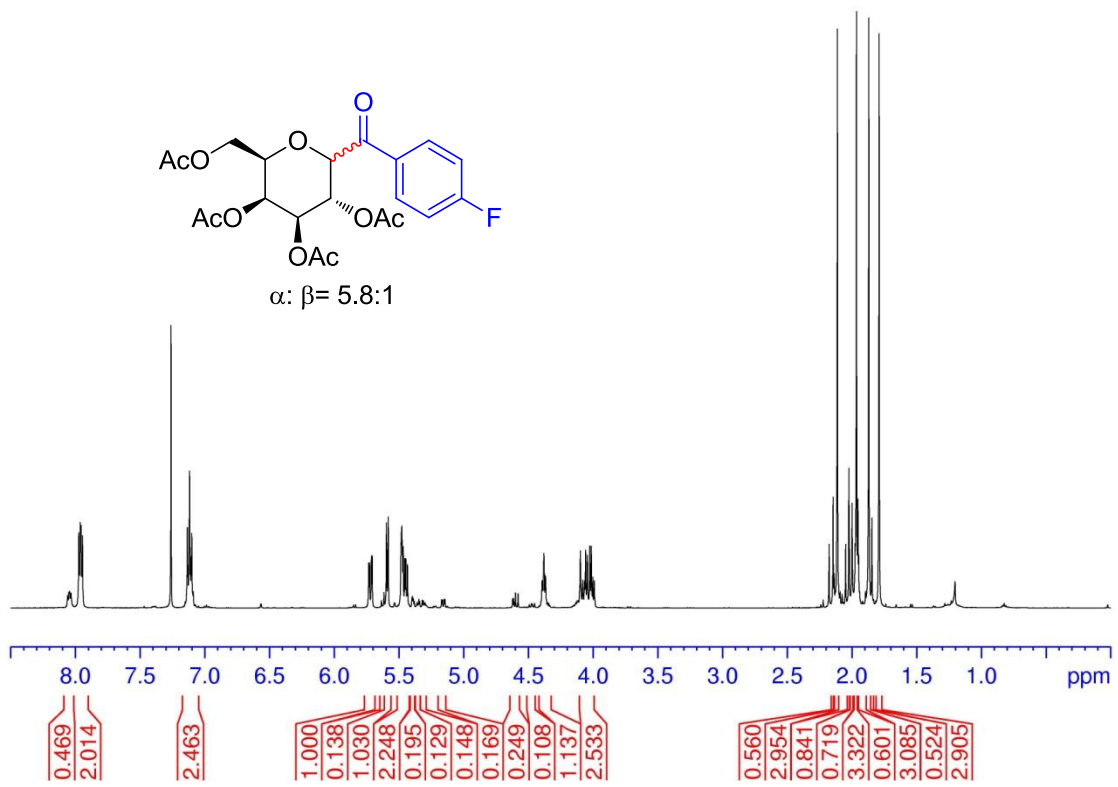

7.649  
 7.306  
 7.300  
 6.584  
 5.805  
 5.787  
 5.768  
 5.432  
 5.419  
 5.312  
 5.294  
 5.279  
 5.110  
 5.091  
 5.072  
 4.573  
 4.556  
 4.248  
 4.240  
 4.223  
 4.215  
 4.089  
 4.066  
 2.060  
 2.043  
 2.017  
 1.833

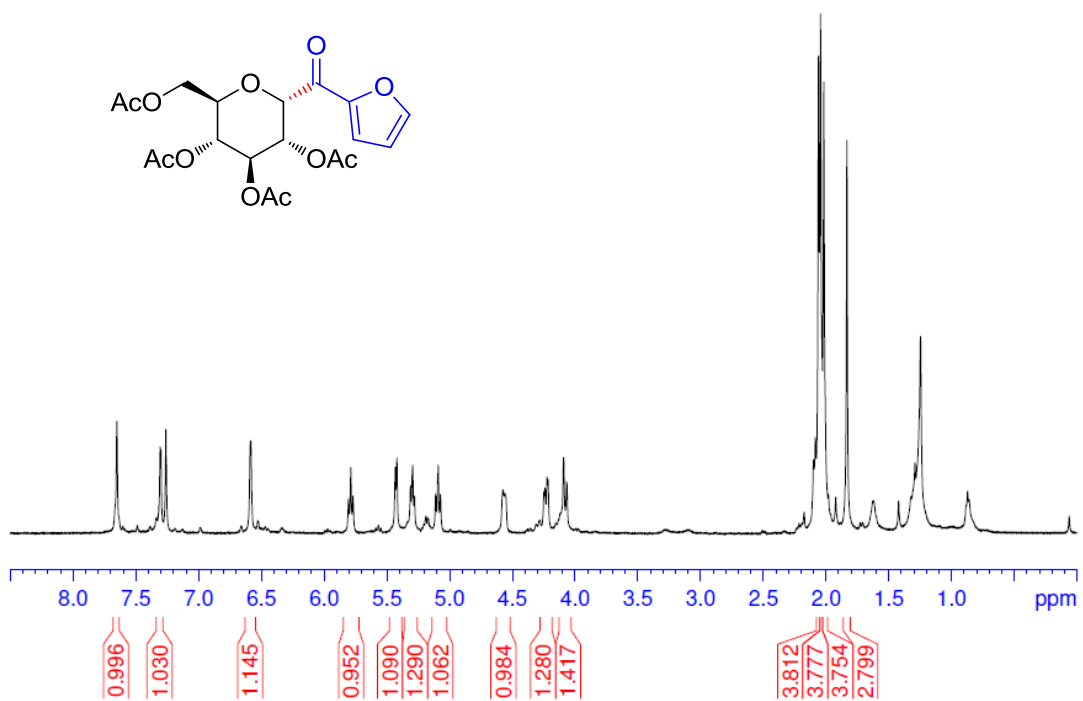

Supplement: c5cc03113c1.pdf [file c5cc03113c1.pdf]
